# Supplementary material for: Meta-analysis of anti-Saccharomyces cerevisiae antibodies as diagnostic markers of Behçet’s disease with gastrointestinal involvement
Source: PubMed Central journal article supplement — BMJ Open. 2020 Oct 6;10(10):e033880. doi: 10.1136/bmjopen-2019-033880 (PMC7539584; doi:10.1136/bmjopen-2019-033880), 2020-10-06

# BMJ Open

BMJ Open is committed to open peer review. As part of this commitment we make the peer review history of every article we publish publicly available.

When an article is published we post the peer reviewers' comments and the authors' responses online. We also post the versions of the paper that were used during peer review. These are the versions that the peer review comments apply to.

The versions of the paper that follow are the versions that were submitted during the peer review process. They are not the versions of record or the final published versions. They should not be cited or distributed as the published version of this manuscript.

BMJ Open is an open access journal and the full, final, typeset and author-corrected version of record of the manuscript is available on our site with no access controls, subscription charges or pay-per-view fees (<http://bmjopen.bmj.com>).

If you have any questions on BMJ Open's open peer review process please email [info.bmjopen@bmj.com](mailto:info.bmjopen@bmj.com)

# BMJ Open

## Meta-analysis of Anti- *Saccharomyces Cerevisiae* Antibodies as diagnostic markers of Behçet's disease

|                               |                                                                                                                                                                                                                            |
|-------------------------------|----------------------------------------------------------------------------------------------------------------------------------------------------------------------------------------------------------------------------|
| Journal:                      | <i>BMJ Open</i>                                                                                                                                                                                                            |
| Manuscript ID                 | bmjopen-2019-033880                                                                                                                                                                                                        |
| Article Type:                 | Original research                                                                                                                                                                                                          |
| Date Submitted by the Author: | 26-Aug-2019                                                                                                                                                                                                                |
| Complete List of Authors:     | Cheng, Linlin; Peking Union Medical College Hospital, Peking Union Medical College and Chinese Academy of Medical Sciences, Department of Clinical Laboratory<br>Li, Liubing<br>Liu, Chenxi<br>Yan, Songxin<br>Li, Yongzhe |
| Keywords:                     | Behçet's disease, Anti-saccharomyces cerevisiae antibodies, autoimmune diseases, meta-analysis, autoantibodies                                                                                                             |
|                               |                                                                                                                                                                                                                            |

SCHOLARONE™  
Manuscripts

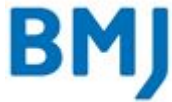

I, the Submitting Author has the right to grant and does grant on behalf of all authors of the Work (as defined in the below author licence), an exclusive licence and/or a non-exclusive licence for contributions from authors who are: i) UK Crown employees; ii) where BMJ has agreed a CC-BY licence shall apply, and/or iii) in accordance with the terms applicable for US Federal Government officers or employees acting as part of their official duties; on a worldwide, perpetual, irrevocable, royalty-free basis to BMJ Publishing Group Ltd ("BMJ") its licensees and where the relevant Journal is co-owned by BMJ to the co-owners of the Journal, to publish the Work in this journal and any other BMJ products and to exploit all rights, as set out in our [licence](#).

The Submitting Author accepts and understands that any supply made under these terms is made by BMJ to the Submitting Author unless you are acting as an employee on behalf of your employer or a postgraduate student of an affiliated institution which is paying any applicable article publishing charge ("APC") for Open Access articles. Where the Submitting Author wishes to make the Work available on an Open Access basis (and intends to pay the relevant APC), the terms of reuse of such Open Access shall be governed by a Creative Commons licence – details of these licences and which [Creative Commons](#) licence will apply to this Work are set out in our licence referred to above.

Other than as permitted in any relevant BMJ Author's Self Archiving Policies, I confirm this Work has not been accepted for publication elsewhere, is not being considered for publication elsewhere and does not duplicate material already published. I confirm all authors consent to publication of this Work and authorise the granting of this licence.

1  
2  
3  
4 1 Meta-analysis of Anti- *Saccharomyces Cerevisiae* Antibodies as diagnostic markers of  
5  
6  
7 2 Behçet's disease  
8  
9

10 3 **Linlin Cheng, MD,<sup>a</sup> Liubing Li, MD,<sup>a</sup> Chenxi Liu, MD,<sup>a</sup> Songxin Yan, MS,<sup>a</sup> Yongzhe**  
11  
12  
13 4 **Li, PhD<sup>a\*</sup>.**  
14

15  
16 5 **<sup>a</sup>Department of Clinical Laboratory, Peking Union Medical College Hospital, Peking**  
17  
18  
19 6 **Union Medical College and Chinese Academy of Medical Sciences, Beijing, China**  
20  
21

22  
23 7 **For correspondence: Yongzhe Li\***  
24

25  
26 8 **Email address: [yongzhelipumch@126.com](mailto:yongzhelipumch@126.com)**  
27  
28  
29

30  
31  
32  
33 10 **Abstract**  
34

35  
36  
37 11 **Objective:** To assess the diagnostic value of anti-*saccharomyces cerevisiae* antibodies  
38  
39 12 (ASCA) in Behçet's disease (BD) patients and explore their relationship with other  
40  
41 13 autoimmune diseases(AID).  
42  
43  
44

45  
46 14 **Methods:** Relevant studies investigating ASCA levels in BD patients were retrieved from  
47  
48 15 PubMed, EMBASE, Web of Science, SOCPUS, and the Cochrane Library. Review  
49  
50 16 Manager 5.3, Meta-DiSc 1.4 and Stata/SE 12.0 were used to perform quality assessment,  
51  
52 17 meta-analysis, and sensitivity analysis. Subgroup analysis were performed disaggregated  
53  
54  
55



1  
2  
3  
4 18 by isotypes of ASCA. We also summarized the diagnostic performance of ASCA in AID  
5  
6  
7 19 based on a comprehensive database search.  
8  
9

10 20 **Results:** Nine studies were included in the meta-analysis. All four types of ASCA were  
11  
12  
13 21 useful to distinguish between gastrointestinal BD (GIBD) and healthy controls (HC).  
14  
15  
16 22 ASCA-IgG was useful to differentiate between GIBD and HC [odds ratio (OR) 5.74 (95%  
17  
18 23 confidence interval (CI), 2.83–11.65); sensitivity 0.34 (95% CI, 0.27–0.41); specificity  
19  
20  
21 24 0.93 (95% CI, 0.87–0.96)]; based on summary receiver operating characteristic curve, the  
22  
23  
24 25 positive rate in Crohn's disease (CD) was higher than that in BD/GIBD, while patients with  
25  
26  
27 26 negative results were more likely to be diagnosed as CD. However, it was difficult to  
28  
29  
30 27 distinguish GIBD from intestinal tuberculosis (iTb) and ulcerative colitis (UC), and to  
31  
32 28 distinguish BD from UC and HC, with the area under the curve approximately 0.5 for all.  
33  
34

35 29 **Conclusion:** ASCA may not be a useful serologic marker of BD/GIBD. It does not play a  
36  
37  
38 30 significant role in the differential diagnosis from intestinal diseases. The prevalence of  
39  
40  
41 31 ASCA in AID suggests a common pathogenetic role in AID.  
42  
43

44 32 Key words: Behçet's disease; Anti-saccharomyces cerevisiae antibodies; autoimmune  
45  
46  
47 33 diseases; meta-analysis; autoantibodies  
48  
49

50  
51 34  
52  
53

54 35  
55  
56  
57  
58  
59  
60

1  
2  
3  
4 **36 Strengths and limitations of this study**

5  
6  
7  
8 37 Behcet's disease is a non-marker autoimmune/inflammatory disease in which  
9  
10 38 autoantibodies play an important role.

11  
12  
13  
14 39 We perform group analysis according to antibody subtypes of ASCA.

15  
16  
17 40 The control groups include healthy controls and differential diagnosis disease  
18  
19  
20 41 (inflammatory bowel disease)

21  
22  
23  
24 42 Comprehensive summary of ASCA antibodies in autoimmune diseases is included.

25  
26  
27 43 Too much subgrouping may lead to potential heterogeneity  
28  
29  
30  
31 44

32  
33  
34 **45 Introduction**

35  
36  
37  
38 46 Behçet's disease (BD) is a chronic systemic vascular inflammatory disease with a high  
39  
40  
41 47 propensity for recurrence. The etiopathogenesis of BD is yet to be elucidated. The  
42  
43  
44 48 condition is characterized by recurrent oral ulcers, genital ulcers, ophthalmitis, and skin  
45  
46  
47 49 lesions. It can also involve blood vessels, nervous system, digestive tract, joints, and other  
48  
49  
50 50 organs in the body. BD not only impairs the quality of life of patients but can also cause  
51  
52  
53 51 serious consequences and even death. Involvement of eyes, the central nervous system, and  
54  
55  
56 52 large blood vessels may lead to serious complications. The onset of BD typically occurs in

1  
2  
3  
4 53 the third or fourth decade of life; the condition is rarely seen in children or in individuals  
5  
6  
7 54 older than 50 years [1]. BD has a typical geographical distribution consistent with the  
8  
9  
10 55 historical "Silk Road"; therefore, the condition is also referred to as the "Silk Road Disease".  
11  
12 56 Its prevalence has considerably increased in the Mediterranean region, the Middle East and  
13  
14  
15 57 the Far East; Turkey has the highest prevalence rate of BD (420/100,000) [2]. This peculiar  
16  
17  
18 58 geographical distribution suggests a role of genetic factors in the pathogenesis of BD. An  
19  
20  
21 59 increasing number of studies have shown a strong correlation between human leukocyte  
22  
23  
24 60 antigen HLA-B51 and BD [3, 4]. However, a significant number of patients with BD test  
25  
26  
27 61 negative for HLA-B51; in addition, the HLA-B51 positivity rate is lower in patients with  
28  
29  
30 62 bone disease, especially in non-endemic areas; this indicates that other factors may play a  
31  
32  
33 63 role in the pathogenesis of BD [5]. Due to the lack of specific laboratory tests, the diagnosis  
34  
35  
36 64 of BD is typically challenging and is mainly based on clinical manifestations. The 1990  
37  
38  
39 65 International Study Group (ISG) criteria [6] were earlier used for the clinical diagnosis of  
40  
41  
42 66 BD; however, owing to its low sensitivity, the criteria were updated in 2013 and are now  
43  
44  
45 67 referred to as the International Criteria for Behçet's Disease (ICBD) [7]. However, these  
46  
47  
48 68 criteria do not include any laboratory tests, and are based on the clinician's judgment, which  
49  
50  
51 69 is relatively subjective and may lead to misdiagnosis. Due to the non-specific clinical  
52  
53  
54 70 characteristics, those with prominent involvement of a particular organ system are easily  
55  
56  
57 71 misdiagnosed. Patients with gastrointestinal involvement as the main manifestation are

1  
2  
3  
4 72 easily misdiagnosed as Crohn's disease (CD), ulcerative colitis (UC), or intestinal  
5  
6  
7 73 tuberculosis (iTB); joint symptoms are misdiagnosed as rheumatoid arthritis or ankylosing  
8  
9  
10 74 spondylitis; skin mucosal damage is misdiagnosed as polymorphic erythema, nodular  
11  
12 75 erythema, syphilis, or systemic lupus erythematosus. Likewise, nervous system damage is  
13  
14  
15 76 misdiagnosed as infectious or allergic meningitis, cerebrospinal tumor, multiple sclerosis,  
16  
17  
18 77 or psychosis. In addition, diagnosis is frequently delayed until the development of clinical  
19  
20 78 manifestations to qualify the criteria. Studies have shown that BD is often diagnosed after  
21  
22  
23 79 a gap of several years from the first appearance of symptoms. For example, patients with  
24  
25  
26 80 oral ulcers were diagnosed with BD after a mean delay of  $3.77\pm 4.43$  years after the  
27  
28  
29 81 appearance of oral ulcers [8]. The delay in diagnosis may have deleterious effects on the  
30  
31 82 patients.

32  
33  
34  
35 83 Several recent studies have shown that anti-Saccharomyces Cerevisiae antibody (ASCA),  
36  
37  
38 84 directed against the phosphopeptidomannan part of the cell wall of the yeast, is an  
39  
40  
41 85 important serological marker of BD, especially in patients with gastrointestinal  
42  
43  
44 86 manifestations. However, patients with inflammatory bowel disease such as Crohn's  
45  
46  
47 87 disease (CD) also have a high prevalence rate of ASCA [9, 10, 11, 12, 13, 14]. Thus,  
48  
49  
50 88 comprehensive quantitative analysis to assess the relevance of ASCA as a routine  
51  
52  
53 89 laboratory test for diagnosis for BD is a key imperative. We performed a meta-analysis of  
54  
55  
56 90 relevant studies to assess the diagnostic relevance of ASCA as a marker of BD.

1  
2  
3  
4 915  
6  
7  
8 92 **Methods**9  
10  
11 93 Literature search

12  
13  
14 94 A comprehensive literature search was performed in 5 biomedical databases, i.e., PubMed,  
15  
16  
17 95 EMBASE, Web of Science, SOCPUS, and the Cochrane Library. The key words used were  
18  
19  
20 96 Behçet's disease and anti-Saccharomyces Cerevisiae antibody. Search range was "all fields"  
21  
22  
23 97 or "all text". No restrictions were imposed with respect to time of publication, region, or  
24  
25  
26 98 ethnicity of the study population. All documents were updated to January 2019.

27  
28  
29 9930  
31  
32 100 Eligibility and exclusion criteria

33  
34  
35  
36 101 The inclusion criteria were: (1) studies that evaluated the diagnostic accuracy of ASCA in  
37  
38  
39 102 BD; (2) availability of adequate data pertaining to the prevalence rate or serum levels of  
40  
41  
42 103 ASCA in patients with BD; (3) studies with healthy population and/or disease controls; (5)  
43  
44  
45 104 meeting abstracts or letters to the editor were also included.

46  
47  
48 105 The exclusion criteria were: (1) studies with incomplete data; (2) review articles; (3) non-  
49  
50  
51 106 English articles; (4) in case of studies with overlapping study population, studies with  
52  
53  
54 107 smaller sample size were excluded. Two investigators independently performed the

1  
2  
3  
4 108 literature search, screened the titles and abstracts, followed by full-text review of eligible  
5  
6  
7 109 studies.  
8  
9

10  
11 110

#### 14 111 Data extraction and quality assessment

15  
16  
17 112 Two independent investigators reviewed the full-text articles, extracted the data, and  
18  
19  
20 113 assessed the study quality using the Quality Assessment of Diagnostic Accuracy Studies  
21  
22  
23 114 (QUADAS-2) through Revman 5.3; the included items were evaluated as yes, no, or  
24  
25  
26 115 uncertain. Inter-researcher disagreements were resolved by consensus, or by a third  
27  
28  
29 116 investigator. Data pertaining to the following variables were extracted: publication year,  
30  
31  
32 117 article type, first author's name, country, isotypes of ASCA detected, age and sex, research  
33  
34  
35 118 design, sample size, experimental method, trade names of experimental materials, cut-off  
36  
37  
38 119 values, diagnostic criteria, and serum titers and/or prevalence rate of ASCA in BD,  
39  
40  
41 120 gastrointestinal BD (GIBD), healthy controls (HC), patients with Crohn's disease (CD),  
42  
43  
44 121 ulcerative colitis (UC), and intestinal tuberculosis (iTb). The data were either obtained  
45  
46  
47 122 directly from the article, calculated, or requested from the author via e-mail.

48  
49 123

#### 51 124 Statistical analysis

1  
2  
3  
4 125 We used Stata/SE 12.0, Review Manager 5.3, and Meta-DiSc 1.4 for data analysis.  
5  
6  
7 126 Subgroup analysis was performed disaggregated by the isotypes of ASCA and different  
8  
9  
10 127 disease controls. Heterogeneity among the included studies was evaluated using the  
11  
12 128 Cochran's Q-statistic as well as the I<sup>2</sup>-statistic. P value > 0.10 for the Q-statistic, or I<sup>2</sup> < 50%  
13  
14  
15 129 was considered indicative of lack of significant heterogeneity and the fixed effects model  
16  
17  
18 130 (FEM) was used for the analysis; in case of significant heterogeneity, the random effects  
19  
20  
21 131 models (REM) was used for analysis. We analyzed the pooled diagnostic odds ratio (DOR),  
22  
23  
24 132 sensitivity, specificity, positive likelihood ratio (LR+), and negative likelihood ratio (LR-),  
25  
26  
27 133 and their corresponding 95% confidence intervals (CI). The area under the summary  
28  
29  
30 134 receiver operating characteristic (SROC) curve was used to assess the overall diagnostic  
31  
32  
33 135 performance of ASCA. Sensitivity analysis was performed using Stata/SE 12.0 to evaluate  
34  
35  
36 136 stability of the results after sequential exclusion of one study at a time.  
37  
38  
39 137 Studies for which adequate data was not available or for whom adequate control group  
40  
41  
42 138 information was not available (especially meeting abstracts and letters to the editors) were  
43  
44  
45 139 also reviewed but not included in the meta-analysis.  
46  
47  
48  
49  
50 141 Patient and public involvement

1  
2  
3  
4 142 The present study is a meta-analysis and systematic review based on published data, patient  
5  
6  
7 143 and public are not involved in the study design, conduct, data analysis and result  
8  
9  
10 144 dissemination

11  
12  
13 145

## 146 **Results**

147 Literature search and characteristics of studies

148 A total of 599 documents were retrieved on database and manual search. Forty-eight  
149 duplicate publications were excluded using the document management software. A total of  
150 126 records were retained after screening of titles and/or abstracts; the excluded records  
151 included review articles, animal model studies, therapeutic or drug research, genetic  
152 research, book chapters, duplicate publications not recognized by software, and other  
153 irrelevant records. After full-text review for eligibility, 21 records were selected. Finally,  
154 we identified 14 [9, 10, 11, 12, 13, 15, 16, 17, 18, 19, 20, 21, 22, 23] studies; of these,  
155 adequate data was available only for 9 studies and were included in the meta-analysis  
156 (Figure 1). Two studies were included after obtaining the relevant data by contacting the  
157 respective authors [12, 13]. In addition, we also verified 2 studies [18, 19] with overlapping  
158 study population; of these, only one study was included in the meta-analysis. Three studies  
159 [9, 11, 21] were presented as meeting abstracts without adequate data to allow the



1  
2  
3  
4 160 construction of a 2×2 table. One [10] article was a letter to the editor and only reported the  
5  
6  
7 161 prevalence rate of ASCA antibody in patients with BD, without information about the  
8  
9  
10 162 control group. One study [20] had employed a unique calculation method and could not be  
11  
12 163 included in the meta-analysis. Among the included studies, there were 326 cases of BD,  
13  
14  
15 164 294 cases of GIBD, 520 cases of CD, 598 cases of UC, 112 cases of iTB, and 428 HCs  
16  
17  
18 165 (Table 1 and Table S1).

19  
20  
21 166

#### 22 23 24 25 167 Quality assessment

26  
27  
28 168 There were 8 prognostic studies and 1 retrospective study [12]. The results of quality  
29  
30  
31 169 assessment including the risk of bias and applicability concerns pertaining to each domain  
32  
33  
34 170 are shown in Fig S1. The results indicated that the included studies were of high quality in  
35  
36  
37 171 general; however, 8 studies showed a high risk of bias with respect to patient selection  
38  
39 172 (avoidance of inappropriate exclusion). Overall, none of the 9 included studies showed any  
40  
41  
42 173 major methodological bias or flaws, which indicates robustness of our meta-analysis.

43  
44  
45 174

#### 46 47 48 49 175 Meta-analysis

50  
51  
52  
53  
54  
55  
56  
57  
58  
59  
60

1  
2  
3  
4 176 We conducted a meta-analysis of 9 studies that involved detection of ASCA in patients  
5  
6  
7 177 with BD and controls. Subsequently, we performed subgroup analysis based on different  
8  
9  
10 178 controls and isotypes of ASCA.

11  
12 179

13  
14  
15 180 1. Meta-analysis of prevalence rate of ASCA in various groups of patients using Meta-  
16  
17  
18 181 DiSc 1.4

19  
20  
21 182 We analyzed the diagnostic accuracy of ASCA in BD (without gastrointestinal  
22  
23  
24 183 involvement)/GIBD/HC/UC/CD/iTB using the Revman 5.3 diagnostic test accuracy  
25  
26  
27 184 review model and Meta-DiSc 1.4. The results obtained with Meta-DiSc 1.4 are summarized  
28  
29  
30 185 in Table 2; some of the results are presented separately (Figure S2A-F). In addition, AUC  
31  
32  
33 186 are also showed separately by Revman 5.3 (Figure 2A-G).

34  
35  
36 187 When we compared BD and HC, we found limited overall diagnostic value, with the  
37  
38  
39 188 exception of slightly higher ORs for IgA and IgG/IgA [IgA, 2.26 (95% CI 0.56–9.12);  
40  
41  
42 189 IgG/IgA, 2.85 (95% CI 0.57–14.29)] and LR+ [IgA, 2.03 (95% CI 0.58–7.17); IgG/IgA,  
43  
44  
45 190 2.08 (95% CI 0.67–6.41)]. However, both showed a high specificity (> 90%) and low  
46  
47  
48 191 sensitivity (< 20%) (Table 2).

49  
50  
51 192 Overall, ASCA showed the highest diagnostic value in the GIBD vs. HC sub-group  
52  
53  
54 193 analysis, with high OR and LR+. ASCA-IgG had the highest OR [5.46 (95% CI 2.58–

1  
2  
3  
4 194 11.55)] and highest sensitivity [0.34 (95% CI 0.27–0.41)] in all groups (Figure S2A, B). In  
5  
6  
7 195 addition, the diagnostic value of ASCA was apparently higher than that in BD vs. HC sub-  
8  
9  
10 196 group analysis (Table 2).

11  
12  
13 197 When we compared GIBD and CD, both the OR and the LR+ were less than 1 (Table 2,  
14  
15  
16 198 Figure S2C-F), which suggests that ASCA negative results are more likely to be diagnosed  
17  
18  
19 199 as BD at the time of differential diagnosis.

20  
21  
22 200 The diagnostic value of ASCA was also limited when comparing GIBD and UC. Both the  
23  
24  
25 201 OR and LR+ were approximately 2. Both IgG and IgA positivity increased the value of  
26  
27  
28 202 LR+ [2.02 (95% CI 1.04–3.95)] (Table 2).

29  
30  
31 203 When comparing GIBD and iTB, although IgG/IgA increased the sensitivity [0.32 (95%  
32  
33  
34 204 CI (0.24–0.41)], the OR and LR+ were both approximately 1, which suggests that either  
35  
36  
37 205 IgG or IgA positivity may also increase the detection rate of ASCA in iTB, not just GIBD  
38  
39  
40 206 (Table 2).

41  
42  
43 207 On ROC curve analysis for distinguishing between BD and HC, the AUC for most antibody  
44  
45  
46 208 subtypes was slightly higher than 0.5 (or even lower than 0.5); of these, ASCA-IgG/IgA  
47  
48  
49 209 had the highest diagnostic efficacy (Figure 2A). In the BD vs. CD analysis, the AUC of  
50  
51  
52 210 ASCA was less than 0.5 (Figure 2B). The AUCs for BD vs. UC (Figure 2C), GIBD vs. CD  
53  
54  
55 211 (Figure 2E), and GIBD vs. iTB analyses (Figure 2G) were approximately 0.5. The AUC

1  
2  
3  
4 212 for GIBD vs. UC analysis was at a general level (Figure 2F). The AUC was highest for the  
5  
6  
7 213 GIBD vs. HC analysis, especially for ASCA-IgG/IgA/IgM, although only one study was  
8  
9  
10 214 included (Figure 2D)

11  
12  
13 215

## 16 216 2. Meta-analysis of serum levels of ASCA in groups by Stata/SE 12.0

17  
18  
19  
20 217 In order to increase the robustness of the meta-analysis, we also extracted the data  
21  
22  
23 218 pertaining to serum levels of ASCA from five studies and performed meta-analysis using  
24  
25  
26 219 the Continuous data module of Stata/SE 12.0. The FEM was used for the analysis and  
27  
28  
29 220 weighted mean difference (WMD) was used as the effect measure. We used FEM for five  
30  
31 221 subgroups with  $I^2 < 50\%$  and  $p > 0.1$  (Figure 3A). WMD was used because the same unit was  
32  
33  
34 222 used in these studies and there were only minor differences (less than three times) with  
35  
36  
37 223 respect to the serum levels of ASCA (Figure 3A). We found that ASCA-IgA in GIBD was  
38  
39 224 significantly greater than that in HC and UC, in contrast to ASCA-IgG. On the contrary,  
40  
41  
42 225 levels of ASCA-IgG in CD were apparently higher than that in BD. For subgroups with  
43  
44  
45 226  $I^2 > 50\%$  and  $p < 0.1$ , we chose the REM for analysis using the WMD. We found no  
46  
47  
48 227 significant difference between GIBD and CD with respect to the serum levels of ASCA-  
49  
50 228 IgA (Figure 3B).

51  
52  
53 229

1  
2  
3  
4 230 Heterogeneity and sensitivity analysis  
5  
6

7 231 We performed sensitivity analysis to assess the stability of the results. The results showed  
8  
9  
10 232 that the studies by Krause et al (2002), Zhang et al (2018), Kocazeybe et al (2010), and  
11  
12  
13 233 Fresko et al (2005) were the key contributors to the heterogeneity (Figure S3). Thus, the  
14  
15  
16 234 results of related subgroup analysis are considered to be less stable. We further applied  
17  
18  
19 235 REM to analyze these seven subgroups; the forest plot is shown in Figure S4.  
20  
21

22 236 Summary of the relationship of ASCA with autoimmune disease  
23  
24

25 237 We searched the database for the association between ASCA and AID. The sensitivity,  
26  
27  
28 238 specificity, LR+, and LR- are summarized in Table 3.  
29  
30

31  
32 239  
33  
34

## 35 240 **Discussion**

36  
37  
38

39 241 The diagnosis of BD is typically challenging prior to the appearance of clinical symptoms  
40  
41  
42 242 to qualify the diagnostic criteria. Currently, there are no specific laboratory biomarkers of  
43  
44  
45 243 BD; however, some specific autoantibodies in the context of BD have been reported.  
46  
47  
48 244 Therefore, identification of non-invasive specific diagnostic and prognostic biomarkers of  
49  
50  
51 245 BD is of much clinical relevance and a key focus area of research.  
52  
53  
54  
55  
56  
57  
58  
59  
60

1  
2  
3  
4 246 Several recent studies have assessed the relation between ASCA and BD. *Saccharomyces*  
5  
6  
7 247 *cerevisiae*, also known as the baker's or brewer's yeast, has long been utilized to ferment  
8  
9  
10 248 the sugars in rice, wheat, barley, and corn to produce alcoholic beverages; it is also used in  
11  
12 249 the baking industry to raise dough. As a consequence, we are now commonly exposed to  
13  
14  
15 250 yeast [24]. IgG and IgA antibodies against the phosphopeptidomannan of the *S. cerevisiae*  
16  
17  
18 251 cell wall have been discovered as autoantibodies in the sera of patients with BD, especially  
19  
20  
21 252 those with gastrointestinal involvement. This suggests a role of environmental stimuli in  
22  
23 253 the pathogenesis of BD. However, patients with gastrointestinal involvement, especially  
24  
25  
26 254 those with Crohn's disease, also have a high prevalence rate of ASCA , which is a  
27  
28  
29 255 controversial issue [25]. Moreover, a growing number of studies have assessed ASCA in  
30  
31  
32 256 several systemic and organ-specific AID, which led to postulation of molecular mimicry  
33  
34  
35 257 as a possible link between ASCA and AID, such as scleroderma, systemic lupus  
36  
37  
38 258 erythematosus, primary Sjögren's syndrome, rheumatoid arthritis, autoimmune liver  
39  
40  
41 259 disease, and spondyloarthritis (Table 3). Their correlation with elevated IgA suggests that  
42  
43  
44 260 ASCA may be an indirect sign of enhanced mucosal immunity [26]. Therefore, detection  
45  
46  
47 261 of ASCA may be a useful serologic marker of BD and other AID, especially those with  
48  
49  
50 262 gastrointestinal involvement.

51 263 To the best of our knowledge, this is the second meta-analysis of evidence pertaining to  
52  
53  
54 264 autoantibodies in patients with BD after anticardiolipin antibodies [27]. ASCA have been

1  
2  
3  
4 265 widely researched in BD, Crohn's disease and other autoimmune disease; in order to  
5  
6  
7 266 investigate the diagnostic value and possible pathogenetic role of ASCA in BD, we  
8  
9  
10 267 included 9 studies to assess the diagnostic accuracy of ASCA in BD. Among these, some  
11  
12 268 studies included BD patients with various clinical manifestations. Some studies included  
13  
14  
15 269 BD patients with systemic involvement symptoms including or excluding gastrointestinal  
16  
17  
18 270 involvement, while others included only BD patients with gastrointestinal involvement.  
19  
20  
21 271 Therefore, in order to reduce the impact of differences with respect to frequency  
22  
23 272 distribution of gastrointestinal symptoms in each study, we disaggregated patients with BD  
24  
25  
26 273 into those with gastrointestinal involvement only and those without gastrointestinal  
27  
28  
29 274 manifestations. The isotype antibodies of ASCA tested and the results presented by the  
30  
31  
32 275 studies are also different. Studies had investigated IgG, IgA, either IgG or IgA, both IgG  
33  
34  
35 276 and IgA, IgG, IgA and IgM, and even IgG subtypes IgG1–IgG4. Several studies have  
36  
37  
38 277 shown a higher prevalence of ASCA among patients with BD/GIBD/CD; however, the  
39  
40  
41 278 results of meta-analysis showed that ASCA is not a useful biomarker for the differential  
42  
43  
44 279 diagnosis between GIBD and CD; however, ASCA negative results may be more likely to  
45  
46  
47 280 be diagnosed as GIBD/BD when compared with CD. In addition, ASCA showed the  
48  
49  
50 281 highest diagnostic value in the GIBD vs. HC sub-group analysis; all four types of ASCA  
51  
52  
53 282 were found to help distinguish between GIBD and HC. However, we found limited  
54  
55  
56 283 diagnostic value of ASCA in BD vs. HC and GIBD vs. UC sub-group analyses. Moreover,

1  
2  
3  
4 284 it failed to distinguish between GIBD and iTB. Overall, use of ASCA-IgG in combination  
5  
6  
7 285 with IgA helped improve the specificity of the diagnosis of BD in all groups. Moreover,  
8  
9  
10 286 we used three different software (Meta-DiSc 1.4, Revman5.3, and Stata/SE 12.0) to  
11  
12 287 perform multiple analyses, which helped increase the credibility of our results. For example,  
13  
14  
15 288 we used both data pertaining to prevalence rate and serum levels of ASCA. Combined with  
16  
17  
18 289 the results of QUADAS-2, we found that the heterogeneity in this meta-analysis was  
19  
20  
21 290 largely attributable to the following reasons (see Table 1, Figure S1). The first reason was  
22  
23  
24 291 the different diagnostic criteria used in the included studies. Different criteria may have  
25  
26  
27 292 different thresholds for diagnosis or place more weight on some symptoms than others.  
28  
29  
30 293 Specifically, the 1990 ISG criteria requires the presence of oral ulceration plus any two of  
31  
32  
33 294 the following: genital ulceration, typical eye lesions, typical skin lesions, or positive  
34  
35  
36 295 pathergy test for diagnosis of BD [6]. In contrast, the 1987 Japan criteria require all four  
37  
38  
39 296 characteristics for diagnosis of BD, i.e., oral ulceration, typical eye lesions, typical skin  
40  
41  
42 297 lesions, and genital ulceration [28]. The ISG criteria and the Japanese criteria often fail to  
43  
44  
45 298 classify some patients with BD; in addition, the Japanese criteria may also cause  
46  
47  
48 299 misclassified diagnosis. This may have caused the different diagnostic sensitivity and  
49  
50  
51 300 specificity for BD [29]. The second contributor to heterogeneity was differences with  
52  
53  
54 301 respect to the characteristics of the study population. The clinical features and laboratory  
55  
56  
57 302 findings tend to exhibit wide variability in different populations and clinical settings [30,  
58  
59  
60



1  
2  
3  
4 303 31]. However, we could not perform subgroup analysis disaggregated by the type of  
5  
6  
7 304 population, owing to the small sample size of various population groups after classification  
8  
9  
10 305 according to isotypes of ASCA. Third, different investigation methods and cut-off values  
11  
12 306 also contributed to the heterogeneity. The two main methods used in the included studies  
13  
14  
15 307 were ELISA and indirect immunofluorescence assay. Notably, although the kits were  
16  
17  
18 308 manufactured by the same company, different cut-off values were used. Different values  
19  
20 309 for ELISA were used for Inova Diagnostic [13, 16, 18, 19, 22] and Euroimmune Leubeck  
21  
22  
23 310 kits [9, 12]. Some studies performed testing through self-coated plates by purchasing  
24  
25  
26 311 ELISA plates and antibodies; thus, the effect of human error and inadequate repeatability  
27  
28  
29 312 cannot be ignored [17, 20].

30  
31  
32 313 In order to fully evaluate the value of ASCA for differential diagnosis of BD, we included  
33  
34  
35 314 patients with CD, UC, and iTB as the comparison objects in our meta-analysis. However,  
36  
37  
38 315 there are still some limitations of this meta-analysis. (1) Gray literature database, paper  
39  
40  
41 316 database, and other language databases were not used for the literature search. (2) Our  
42  
43  
44 317 primary goal was to assess the diagnostic efficacy of ASCA in BD, and therefore we did  
45  
46  
47 318 not include all studies pertaining to ASCA in inflammatory bowel disease and iTB. (3)  
48  
49  
50 319 Restricted by the number of included studies and the isotypes of ASCA, we could not  
51  
52  
53 320 perform subgroup analysis disaggregated by different populations and diagnostic criteria.  
54  
55  
56 321 (4) Some studies with incomplete data were excluded after lack of response from the author.

1  
2  
3  
4 322 Our meta-analysis results, together with the review of ASCA in AID strongly suggest that  
5  
6  
7 323 ASCA (especially its certain isotypes) may be helpful biomarkers for GIBD, especially  
8  
9  
10 324 with respect to their possible predictive/pathogenic/diagnostic role in clinical settings [32].  
11  
12 325 Furthermore, ASCA may be detectable years before the diagnosis of some AID as they  
13  
14  
15 326 were retrospectively found in the preserved blood samples of soldiers who were affected  
16  
17  
18 327 by Crohn's disease years later [33]. However, due to its presence in several other AID,  
19  
20  
21 328 ASCA may have a limited value for clinical diagnosis.  
22  
23  
24 329

1  
2  
3 330 **Compliance with Ethical Standards:**  
4

5  
6 331 **Funding:** This research was supported by grants from the National Natural Science  
7 332 Foundation of China Grants (81671618, 81871302), the CAMS Initiative for Innovative  
8 333 Medicine (2017-I2M-3-001), the CAMS Initiative for Innovative Medicine (2017-I2M-  
9 334 B&R-01)

10  
11  
12  
13 335 **Ethical approval:** This article does not contain any studies with human participants  
14 336 performed by any of the authors.

15  
16  
17 337 **Author Statement:** Study concept and design: Linlin Cheng, Yongzhe Li. Acquisition of  
18 338 data: Linlin Cheng, Liubing Li, Chenxi Liu, Songxin Yan. Statistical analysis and  
19 339 interpretation of data: Linlin Cheng, Liubing Li, Chenxi Liu. Drafting of the manuscript:  
20 340 Linlin Cheng. Revision of manuscript: Yongzhe Li, Linlin Cheng, Liubing Li.  
21 341 Supervision of work: Yongzhe Li. All authors read and approved the final manuscript.

22  
23  
24  
25  
26 342 **competing interests:** None.  
27  
28

29 343  
30

31 344 **References**  
32

- 33  
34 345 1. Greco A, De Virgilio A, Ralli M, Ciofalo A, Mancini P, Attanasio G, et al. Behcet's disease: New  
35 346 insights into pathophysiology, clinical features and treatment options. *Autoimmun Rev* 2018;17(6):567-75.  
36 347 2. Davatchi F, Shahram F, Chams-Davatchi C, Shams H, Nadji A, Akhlaghi M, et al. Behcet's disease:  
37 348 from East to West. *Clin Rheumatol* 2010;29(8):823-33.  
38 349 3. Chajek-Shaul T, Pisanty S, Knobler H, Matzner Y, Glick M, Ron N, et al. HLA-B51 may serve as an  
39 350 immunogenetic marker for a subgroup of patients with Behcet's syndrome. *The American journal of*  
40 351 *medicine* 1987;83(4):666-72.  
41 352 4. Mizuki N, Ota M, Yabuki K, Katsuyama Y, Ando H, Palimeris GD, et al. Localization of the pathogenic  
42 353 gene of Behcet's disease by microsatellite analysis of three different populations. *Investigative*  
43 354 *ophthalmology & visual science* 2000;41(12):3702-8.  
44 355 5. Yazici H, Seyahi E, Hatemi G, Yazici Y. Behcet syndrome: a contemporary view. *Nat Rev Rheumatol*  
45 356 2018;14(2):107-19.  
46 357 6. Criteria for diagnosis of Behcet's disease. International Study Group for Behcet's Disease. *Lancet*  
47 358 1990;335(8697):1078-80.  
48  
49  
50  
51  
52  
53  
54  
55  
56  
57  
58  
59  
60

- 359 7. Davatchi F, Assaad-Khalil S, Calamia KT, Crook JE, Sadeghi-Abdollahi B, Schirmer M, et al. The  
360 International Criteria for Behçet's Disease (ICBD): a collaborative study of 27 countries on the sensitivity  
361 and specificity of the new criteria. *J Eur Acad Dermatol Venereol* 2014;28(3):338-47.
- 362 8. Alpsoy E, Donmez L, Bacanli A, Apaydin C, Butun B. Review of the chronology of clinical  
363 manifestations in 60 patients with Behcet's disease. *Dermatology* 2003;207(4):354-6.
- 364 9. Aslan M, Kocazeybek B, Celik A, Erzin Y, Hatemi I, Hatemi G, et al. Anti-Saccharomyces cerevisiae  
365 (ASCA) antibody levels in a subgroup of patients with ulcerative colitis, Crohn's disease, GI Behcet, and  
366 GI tuberculosis: Correlations with disease duration, activity, and extension. *Int J Infect Dis* 2010;14:e117-  
367 e8.
- 368 10. Filik L, Biyikoglu I. Differentiation of Behcet's disease from inflammatory bowel diseases: Anti-  
369 saccharomyces cerevisiae antibody and anti-neutrophilic cytoplasmic antibody. *World J Gastroenterol*  
370 2008;14(47):7271.
- 371 11. Kocazeybek B, Aslan M, Erzin Y, Celik A, Hatemi I, Hatemi G, et al. Clinical utility of perinuclear  
372 antineutrophil cytoplasmic antibodies and anti-Saccharomyces Cerevisiae antibodies for discriminating  
373 specific intestinal inflammations. *Int J Infect Dis* 2010;14:e118.
- 374 12. Zhang S, Luo J, Li J, Wu Z, Hu C, Li P, et al. Retrospective evaluation of the clinical utility of  
375 serological biomarkers in Chinese patients with inflammatory bowel disease: 2-year clinical experience.  
376 *Clin Chem Lab Med* 2017;55(6):865-75.
- 377 13. Zhang S, Luo J, Wu Z, Roggenbuck D, Schierack P, Reinhold D, et al. Antibodies against glycoprotein  
378 2 display diagnostic advantages over ASCA in distinguishing CD from intestinal tuberculosis and intestinal  
379 Behçet's disease. *Clin Transl Gastroenterol* 2018;9(2):e133.
- 380 14. Lidar M, Langevitz P, Barzilai O, Ram M, Porat-Katz BS, Bizzaro N, et al. Infectious serologies and  
381 autoantibodies in inflammatory bowel disease: insinuations at a true pathogenic role. *Ann N Y Acad Sci*  
382 2009;1173:640-8.
- 383 15. Choi CH, Kim TI, Kim BC, Shin SJ, Lee SK, Kim WH, et al. Anti-Saccharomyces cerevisiae antibody  
384 in intestinal Behcet's disease patients: relation to clinical course. *Dis Colon Rectum* 2006;49(12):1849-59.
- 385 16. Fresko I, Ugurlu S, Ozbakir F, Celik A, Yurdakul S, Hamuryudan V, et al. Anti-Saccharomyces  
386 cerevisiae antibodies (ASCA) in Behcet's syndrome. *Clin Exp Rheumatol* 2005;23(4 Suppl 38):S67-70.
- 387 17. Kim BG, Kim YS, Kim JS, Jung HC, Song IS. Diagnostic role of anti-Saccharomyces cerevisiae  
388 mannan antibodies combined with antineutrophil cytoplasmic antibodies in patients with inflammatory  
389 bowel disease. *Dis Colon Rectum* 2002;45(8):1062-9.
- 390 18. Krause I, Monselise Y, Milo G, Weinberger A. Anti-Saccharomyces cerevisiae antibodies--a novel  
391 serologic marker for Behcet's disease. *Clin Exp Rheumatol* 2002;20(4 Suppl 26):S21-4.
- 392 19. Monselise A, Weinberger A, Monselise Y, Fraser A, Sulkes J, Krause I. Anti-Saccharomyces cerevisiae  
393 antibodies in Behcet's disease--a familial study. *Clin Exp Rheumatol* 2006;24(5 Suppl 42):S87-90.
- 394 20. Oshitani N, Hato F, Jinno Y, Sawa Y, Nakamura S, Matsumoto T, et al. IgG subclasses of anti  
395 Saccharomyces cerevisiae antibody in inflammatory bowel disease. *Eur J Clin Invest* 2001;31(3):221-5.

- 1  
2  
3 396 21. Prado LL, Augusto KL, Magalhães PF, Viana VT, Saad CGS, Gonçalves CR. THU0219 Anti-  
4 397 saccharomyces cerevisiae antibodies (ASCA) in active behçet's disease: A marker of intestinal  
5 398 involvement? *Ann Rheum Dis* 2013;71:229-.
- 7 399 22. Rhee SH, Kim YB, Lee ES. Comparison of Behcet's disease and recurrent aphthous ulcer according to  
8 400 characteristics of gastrointestinal symptoms. *J Korean Med Sci* 2005;20(6):971-6.
- 10 401 23. Vaiopoulos G, Lakatos PL, Papp M, Kaklamanis F, Economou E, Zevgolts V, et al. Serum anti-  
11 402 Saccharomyces cerevisiae antibodies in Greek patients with Behcet's disease. *Yonsei Med J*  
12 403 2011;52(2):347-50.
- 14 404 24. Sicard D, Legras JL. Bread, beer and wine: yeast domestication in the Saccharomyces sensu stricto  
15 405 complex. *C R Biol* 2011;334(3):229-36.
- 17 406 25. Main J, McKenzie H, Yeaman GR, Kerr MA, Robson D, Pennington CR, et al. Antibody to  
18 407 Saccharomyces cerevisiae (bakers' yeast) in Crohn's disease. *BMJ* 1988;297(6656):1105-6.
- 20 408 26. Muratori P, Muratori L, Guidi M, Maccariello S, Pappas G, Ferrari R, et al. Anti-Saccharomyces  
21 409 cerevisiae antibodies (ASCA) and autoimmune liver diseases. *Clin Exp Immunol* 2003;132(3):473-6.
- 22 410 27. Zouboulis CC, Buttner P, Tebbe B, Orfanos CE. Anticardiolipin antibodies in Adamantiades-Behcet's  
23 411 disease. *Br J Dermatol* 1993;128(3):281-4.
- 25 412 28. Mizushima Y, Inaba G, Mimura Y, Ono S. Diagnostic criteria for Behçet's disease in 1987, and  
26 413 guideline for treating Behçet's disease 1988. 391-3 p.
- 28 414 29. Chang HK, Lee SS, Bai HJ, Lee YW, Yoon BY, Lee CH, et al. Validation of the classification criteria  
29 415 commonly used in Korea and a modified set of preliminary criteria for Behcet's disease: a multi-center  
30 416 study. *Clin Exp Rheumatol* 2004;22(4 Suppl 34):S21-6.
- 32 417 30. Kramer M, Hasanreisoglu M, Weiss S, Kumova D, Schaap-Fogler M, Guntekin-Ergun S, et al. Single-  
33 418 Nucleotide Polymorphisms in IL23R-IL12RB2 (rs1495965) Are Highly Prevalent in Patients with Behcet's  
34 419 Uveitis, and Vary between Populations. *Ocul Immunol Inflamm* 2018:1-8.
- 36 420 31. Fedrigo A, Skare TL, Bortoluzzi AL, Nisihara R. ASCA (Anti- Saccharomyces cerevisiae Antibody) in  
37 421 Patients with Scleroderma. *J Clin Rheumatol* 2019;25(1):24-7.
- 38 422 32. Rinaldi M, Perricone R, Blank M, Perricone C, Shoenfeld Y. Anti-Saccharomyces cerevisiae  
39 423 autoantibodies in autoimmune diseases: from bread baking to autoimmunity. *Clin Rev Allergy Immunol*  
40 424 2013;45(2):152-61.
- 42 425 33. Israeli E, Grotto I, Gilburd B, Balicer RD, Goldin E, Wiik A, et al. Anti-Saccharomyces cerevisiae and  
43 426 antineutrophil cytoplasmic antibodies as predictors of inflammatory bowel disease. *Gut* 2005;54(9):1232-6.
- 45 427 34. de Vries M, van der Horst-Bruinsma I, van Hoogstraten I, van Bodegraven A, von Blomberg BM,  
46 428 Ratnawati H, et al. pANCA, ASCA, and OmpC antibodies in patients with ankylosing spondylitis without  
47 429 inflammatory bowel disease. *J Rheumatol* 2010;37(11):2340-4.
- 49 430 35. Riente L, Chimenti D, Pratesi F, Delle Sedie A, Tommasi S, Tommasi C, et al. Antibodies to tissue  
50 431 transglutaminase and Saccharomyces cerevisiae in ankylosing spondylitis and psoriatic arthritis. *J*  
51 432 *Rheumatol* 2004;31(5):920-4.

- 1  
2  
3 433 36. Mundwiler ML, Mei L, Landers CJ, Reveille JD, Targan S, Weisman MH. Inflammatory bowel disease  
4 434 serologies in ankylosing spondylitis patients: a pilot study. *Arthritis Res Ther* 2009;11(6):R177.  
5 435 37. Wallis D, Asaduzzaman A, Weisman M, Haroon N, Anton A, McGovern D, et al. Elevated serum anti-  
6 436 flagellin antibodies implicate subclinical bowel inflammation in ankylosing spondylitis: an observational  
7 437 study. *Arthritis Res Ther* 2013;15(5):R166.  
8 438 38. Krause I, Blank M, Cervera R, Font J, Matthias T, Pfeiffer S, et al. Cross-reactive epitopes on beta2-  
9 439 glycoprotein-I and *Saccharomyces cerevisiae* in patients with the antiphospholipid syndrome. *Ann N Y*  
10 440 *Acad Sci* 2007;1108:481-8.  
11 441 39. Gonzalez T, Malagon C, Guarnizo P, Mosquera AC, Chila-Moreno L, Romero-Sanchez C.  
12 442 Autoantibodies and Gastrointestinal Symptoms in Colombian Children with Juvenile Idiopathic Arthritis.  
13 443 *Curr Rheumatol Rev* 2018;14(2):163-71.  
14 444 40. Czaja AJ, Shums Z, Donaldson PT, Norman GL. Frequency and significance of antibodies to  
15 445 *Saccharomyces cerevisiae* in autoimmune hepatitis. *Dig Dis Sci* 2004;49(4):611-8.  
16 446 41. Papp M, Norman GL, Vitalis Z, Tornai I, Altorjay I, Foldi I, et al. Presence of anti-microbial antibodies  
17 447 in liver cirrhosis--a tell-tale sign of compromised immunity? *PLoS One* 2010;5(9):e12957.  
18 448 42. Sakly W, Jeddi M, Ghedira I. Anti-*Saccharomyces cerevisiae* antibodies in primary biliary cirrhosis.  
19 449 *Dig Dis Sci* 2008;53(7):1983-7.  
20 450 43. Shor DB, Orbach H, Boaz M, Altman A, Anaya JM, Bizzaro N, et al. Gastrointestinal-associated  
21 451 autoantibodies in different autoimmune diseases. *Am J Clin Exp Immunol* 2012;1(1):49-55.  
22 452 44. Yazici D, Aydin SZ, Yavuz D, Tarcin O, Deyneli O, Direskeneli H, et al. Anti-*Saccharomyces*  
23 453 *Cerevisiae* antibodies (ASCA) are elevated in autoimmune thyroid disease ASCA in autoimmune thyroid  
24 454 disease. *Endocrine* 2010;38(2):194-8.  
25 455 45. Mankai A, Thabet Y, Manoubi W, Achour A, Sakly W, Ghedira I. Anti-*Saccharomyces cerevisiae*  
26 456 antibodies are elevated in Graves' disease but not in Hashimoto's thyroiditis. *Endocr Res* 2013;38(2):98-  
27 457 104.  
28 458 46. Dai H, Li Z, Zhang Y, Lv P, Gao XM. Elevated levels of serum IgA against *Saccharomyces cerevisiae*  
29 459 mannan in patients with rheumatoid arthritis. *Cell Mol Immunol* 2009;6(5):361-6.  
30 460 47. Dai H, Li Z, Zhang Y, Lv P, Gao XM. Elevated levels of serum antibodies against *Saccharomyces*  
31 461 *cerevisiae* mannan in patients with systemic lupus erythematosus. *Lupus* 2009;18(12):1087-90.  
32 462 48. Mankai A, Sakly W, Thabet Y, Achour A, Manoubi W, Ghedira I. Anti-*Saccharomyces cerevisiae*  
33 463 antibodies in patients with systemic lupus erythematosus. *Rheumatol Int* 2013;33(3):665-9.  
34 464 49. Sakly W, Mankai A, Sakly N, Thabet Y, Achour A, Ghedira-Besbes L, et al. Anti-*Saccharomyces*  
35 465 *cerevisiae* antibodies are frequent in type 1 diabetes. *Endocr Pathol* 2010;21(2):108-14.  
36 466 50. Alunno A, Bistoni O, Carubbi F, Valentini V, Cafaro G, Bartoloni E, et al. Prevalence and significance  
37 467 of anti-*saccharomyces cerevisiae* antibodies in primary Sjogren's syndrome. *Clin Exp Rheumatol* 2018;36  
38 468 *Suppl 112(3):73-9*.

469

1  
2  
3  
4 470 Figure 1 Schematic illustration of the literature search and study-selection criteria for the  
5  
6  
7 471 meta-analysis  
8  
9

10 472  
11  
12  
13  
14 473 Figure 2 AUC of diagnostic accuracy of ASCA when comparing BD and HC (A), BD  
15  
16 474 and CD (B), BD and UC (C), GIBD and HC (D), GIBD and CD (E), GIBD and UC (F),  
17  
18  
19 475 and GIBD and iTB (G)  
20  
21  
22

23 476  
24  
25  
26 477 Figure 3 A. Forest plot of serum levels of ASCA in GIBD/CD/UC/HC using FEM; B.  
27  
28  
29 478 Forest plot of serum levels of ASCA in GIBD/BD/HC/CD using REM  
30  
31

32 479  
33  
34  
35  
36 480 Fig S1 Results of quality assessment of the included studies based on the QUADAS-1  
37  
38  
39 481 tool  
40  
41

42 482  
43  
44  
45  
46 483 Figure S2 Forest plot of A. pooled diagnostic OR of ASCA-IgG when comparing GIBD  
47  
48 484 and HC; B. pooled sensitivity of ASCA-IgG when comparing GIBD and HC; C. pooled  
49  
50  
51 485 diagnostic OR of ASCA-IgG when comparing GIBD and CD; D. pooled diagnostic OR  
52  
53  
54 486 of ASCA-IgA when comparing GIBD and CD; E. pooled diagnostic OR of ASCA-

1  
2  
3  
4 487 IgG+IgA when comparing GIBD and CD; F. pooled diagnostic OR of ASCA-IgG/IgA  
5  
6  
7 488 when comparing GIBD and CD  
8  
9

10 489

11  
12  
13  
14 490 Figure S3 Results of sensitivity analysis showing sources of heterogeneity

15  
16  
17 491 Figure S4 Forest plot of diagnostic OR of ASCA in 6 subgroups using the random effect  
18  
19  
20 492 model after sensitivity analysis.  
21  
22

23 493

24  
25  
26  
27 494

28  
29  
30 495 Table 1 Characteristics of studies included in the meta-analysis of Anti-Saccharomyces  
31  
32 496 Cerevisiae antibodies in Behçet’s disease, its main differential diagnoses, and healthy  
33  
34  
35  
36 497 controls  
37

38  
39 498 /:no sample; IIF: indirect immunofluorescence assay; NR: not reported; SD: standard deviation; \*: all without  
40  
41 499 gastrointestinal manifestations; #: lack of corresponding data; 1990 ISG criteria: the 1990 criteria of Behçet’s Disease  
42  
43 500 International Study Group; 1987 Japan criteria: the 1987 criteria by the Behçet’s Disease Research Committee of  
44  
45 501 Japan; BD: Behçet’s disease; GIBD: gastrointestinal Behçet’s disease; CD: Crohn's disease; UC: ulcerative colitis; iTB:  
46 502 intestinal tuberculosis; HC: healthy control

47  
48 **Sample size**

| Year and author        | Count<br>ries | Type                       | Type of article  | Design       | Sample size |          |     |     |     |    | Methods | Brands of experimental<br>materials | Cut-off | Diagnostic<br>criteria |
|------------------------|---------------|----------------------------|------------------|--------------|-------------|----------|-----|-----|-----|----|---------|-------------------------------------|---------|------------------------|
|                        |               |                            |                  |              | BD          | GIB<br>D | CD  | UC  | iTB | HC |         |                                     |         |                        |
| 2018 Shulan Zhang [13] | China         | IgG; IgA; IgG/IgA; IgG+IgA | Original article | case-control | /           | 71       | 171 | 208 | 57  | 70 | ELISA   | Inova Diagnostic                    | 25      | NR                     |



|    |      |                        |        |                            |                     |                     |     |     |     |     |    |     |       |                                            |                           |  |                     |  |
|----|------|------------------------|--------|----------------------------|---------------------|---------------------|-----|-----|-----|-----|----|-----|-------|--------------------------------------------|---------------------------|--|---------------------|--|
| 1  |      |                        |        |                            |                     |                     |     |     |     |     |    |     |       |                                            |                           |  |                     |  |
| 2  |      |                        |        |                            |                     |                     |     |     |     |     |    |     |       |                                            |                           |  |                     |  |
| 3  | 2017 | Shulan Zhang [12]      | China  | IgG; IgA; IgG/IgA; IgG+IgA | Original article    | Retrospective study | /   | 34  | 128 | 140 | 31 | /   | ELISA | Euroimmun, Luebeck                         | 20                        |  | NR                  |  |
| 4  |      |                        |        |                            |                     |                     |     |     |     |     |    |     |       |                                            |                           |  |                     |  |
| 5  |      |                        |        |                            |                     |                     |     |     |     |     |    |     |       |                                            |                           |  |                     |  |
| 6  | 2011 | George Vaiopoulos [23] | Greece | IgG; IgA                   | Original article    | case-control        | 58  | 4*  | /   | /   | /  | 56  | ELISA | Inova Diagnostic                           | NR                        |  | 1990 ISG criteria   |  |
| 7  |      |                        |        |                            |                     |                     |     |     |     |     |    |     |       |                                            |                           |  |                     |  |
| 8  | 2010 | B. Kocazeybek. [11]    | Turkey | IgG/IgA                    | conference Abstract | case-control        | /   | 13  | 63  | 102 | 10 | 165 | IIF   | Euroimmun, Luebeck                         | NR                        |  | NR                  |  |
| 9  |      |                        |        |                            |                     |                     |     |     |     |     |    |     |       |                                            |                           |  |                     |  |
| 10 | 2006 | Chang Hwan Choi [15]   | Korea  | IgG                        | Original article    | case-control        | 30* | 106 | /   | /   | /  | 45  | IIF   | Euroimmun, Luebeck                         | 1:1000                    |  | 1987 Japan criteria |  |
| 11 |      |                        |        |                            |                     |                     |     |     |     |     |    |     |       |                                            |                           |  |                     |  |
| 12 | 2005 | I. Fresko [16]         | Turkey | IgG; IgA; IgG/IgA; IgG+IgA | Original article    | case-control        | 85  | 8   | 24  | 25  | /  | 21  | ELISA | Inova Diagnostic                           | 28 for IgG;<br>25 for IgA |  | 1990 ISG criteria   |  |
| 13 |      |                        |        |                            |                     |                     |     |     |     |     |    |     |       |                                            |                           |  |                     |  |
| 14 | 2005 | Seung-Ho Rhee [22]     | Korea  | IgG                        | Original article    | case-control        | /   | 16  | /   | /   | /  | 4   | ELISA | Inova Diagnostic                           | 25                        |  | 1987 Japan criteria |  |
| 15 |      |                        |        |                            |                     |                     |     |     |     |     |    |     |       |                                            |                           |  |                     |  |
| 16 | 2002 | I. Krause [18]         | Israel | IgG; IgA; IgG/IgA; IgG+IgA | Original article    | case-control        | 27* | /   | /   | /   | /  | 10  | ELISA | Inova Diagnostic                           | 25                        |  | 1990 ISG criteria   |  |
| 17 |      |                        |        |                            |                     |                     |     |     |     |     |    |     |       |                                            |                           |  |                     |  |
| 18 | 2002 | Byeong Gwan Kim [17]   | Korea  | IgG+IgA+IgM                | Original article    | case-control        | /   | 36  | 85  | 77  | 14 | 20  | ELISA | plate: Sigma Chemical<br>antibody: Biosoft | ROC curve                 |  | 1987 Japan criteria |  |
| 19 |      |                        |        |                            |                     |                     |     |     |     |     |    |     |       |                                            |                           |  |                     |  |
| 20 |      |                        |        |                            |                     |                     |     |     |     |     |    |     |       |                                            |                           |  |                     |  |

503

504

Table 2. Summary of subgroup meta-analysis of ASCA by Meta-DiSc 1.4

505 / indicates that the number of included studies was less than three and the ROC curve could not be drawn by Meta-DiSc

506 1.4. BD: Behçet's disease; GIBD: gastrointestinal Behçet's disease; CD: Crohn's disease; UC: ulcerative colitis; iTB:

507 intestinal tuberculosis; HC: healthy control

| Subgroup     | Antibody     | Number of studies | Diagnostic OR<br>(95% CI) | <i>P</i> (%) | Pooled sensitivity<br>(95% CI) | <i>P</i> (%) | Pooled specificity<br>(95% CI) | <i>P</i> (%) | LR+(95% CI)      | <i>P</i> (%) | LR-(95% CI)     | <i>P</i> (%) |
|--------------|--------------|-------------------|---------------------------|--------------|--------------------------------|--------------|--------------------------------|--------------|------------------|--------------|-----------------|--------------|
| BD vs. HC    | ASCA-IgG     | 3                 | 0.91(0.15-5.64)           | 56.10        | 0.11(0.06-0.18)                | 91.40        | 0.91(0.82-0.96)                | 0            | 0.86(0.18-4.12)  | 50.10        | 0.98(0.81-1.18) | 70.60        |
|              | ASCA-IgA     | 2                 | 2.26(0.56-9.12)           | 0            | 0.16(0.10-0.25)                | 0            | 0.94(0.79-0.99)                | 38.40        | 2.03(0.58-7.17)  | 0            | 0.90(0.79-1.03) | 0            |
|              | ASCA-IgG+IgA | 2                 | 1.13(0.19-6.64)           | 0            | 0.03(0.01-0.08)                | 55.60        | 0.97(0.83-1.00)                | 0            | 0.66(0.09-4.91)  | 0.40         | 1.02(0.93-1.11) | 0            |
|              | ASCA-IgG/IgA | 2                 | 2.85(0.57-14.29)          | 40.90        | 0.27(0.19-0.37)                | 87.20        | 0.88(0.71-0.96)                | 0            | 2.08(0.67-6.41)  | 17.60        | 0.76(0.47-1.22) | 76.80        |
| GIBD vs. HC  | ASCA-IgG     | 3                 | 5.46(2.58-11.55)          | 0            | 0.34(0.27-0.41)                | 83.70        | 0.93(0.87-0.96)                | 0            | 4.17(2.13-8.17)  | 0            | 0.75(0.58-0.97) | 76.10        |
|              | ASCA-IgA     | 2                 | 2.62(1.24-5.51)           | 0            | 0.27(0.17-0.38)                | 0            | 0.88(0.79-0.94)                | 0            | 2.19(1.13-4.23)  | 0            | 0.83(0.71-0.98) | 0            |
|              | ASCA-IgG+IgA | 2                 | 5.27(1.43-19.33)          | 0            | 0.14(0.07-0.24)                | 0            | 0.97(0.91-0.99)                | 0            | 4.61(1.30-16.31) | 0            | 0.88(0.80-0.98) | 0            |
|              | ASCA-IgG/IgA | 3                 | 2.82(1.50-5.33)           | 0            | 0.30(0.21-0.41)                | 0            | 0.92(0.88-0.95)                | 78.30        | 2.25(1.31-3.86)  | 0            | 0.81(0.70-0.94) | 0            |
| GIBD vs. CD  | ASCA-IgG     | 3                 | 0.48(0.28-0.83)           | 0            | 0.18(0.11-0.26)                | 0            | 0.71(0.66-0.76)                | 88.60        | 0.58(0.38-0.89)  | 0            | 1.18(1.06-1.32) | 35.40        |
|              | ASCA-IgA     | 3                 | 0.91(0.56-1.46)           | 0            | 0.28(0.20-0.38)                | 0            | 0.69(0.64-0.74)                | 76.60        | 0.93(0.67-1.30)  | 0            | 1.03(0.90-1.18) | 0            |
|              | ASCA-IgG+IgA | 3                 | 0.58(0.30-1.11)           | 0            | 0.12(0.06-0.19)                | 19.10        | 0.83(0.78-0.87)                | 85.20        | 0.63(0.36-1.11)  | 0            | 1.08(0.99-1.17) | 0            |
|              | ASCA-IgG/IgA | 4                 | 0.57(0.28-1.15)           | 50.20        | 0.33(0.24-0.41)                | 0            | 0.56(0.51-0.61)                | 72.30        | 0.74(0.56-0.97)  | 39.90        | 1.31(0.97-1.75) | 66.40        |
| GIBD vs. UC  | ASCA-IgG     | 3                 | 1.77(1.07-2.92)           | 0            | 0.18(0.11-0.26)                | 0            | 0.89(0.86-0.92)                | 0            | 1.63(0.99-2.68)  | 0            | 0.92(0.84-1.01) | 0            |
|              | ASCA-IgA     | 3                 | 2.12(1.38-3.26)           | 0            | 0.28(0.20-0.38)                | 0            | 0.84(0.80-0.88)                | 0            | 1.80(1.24-2.62)  | 0            | 0.85(0.75-0.96) | 0            |
|              | ASCA-IgG+IgA | 3                 | 2.15(1.16-4.00)           | 0            | 0.12(0.06-0.19)                | 19.10        | 0.94(0.92-0.96)                | 0            | 2.02(1.04-3.95)  | 0            | 0.94(0.88-1.01) | 20.10        |
|              | ASCA-IgG/IgA | 4                 | 2.02(1.38-2.98)           | 0            | 0.33(0.24-0.41)                | 0            | 0.82(0.78-0.85)                | 44.90        | 1.68(1.23-2.31)  | 0            | 0.84(0.74-0.95) | 0            |
| GIBD vs. iTB | ASCA-IgG     | 2                 | 1.08(0.53-2.16)           | 0            | 0.17(0.10-0.26)                | 7.50         | 0.84(0.75-0.91)                | 32.70        | 1.06(0.56-2.00)  | 0            | 0.99(0.87-1.12) | 0            |

|              |   |                 |   |                 |       |                 |       |                 |   |                 |   |
|--------------|---|-----------------|---|-----------------|-------|-----------------|-------|-----------------|---|-----------------|---|
| ASCA-IgA     | 2 | 1.51(0.75-3.04) | 0 | 0.21(0.14-0.30) | 63.90 | 0.85(0.76-0.92) | 4.30  | 1.39(0.75-2.59) | 0 | 0.93(0.82-1.06) | 0 |
| ASCA-IgG+IgA | 2 | 1.01(0.43-2.39) | 0 | 0.10(0.05-0.18) | 19.30 | 0.90(0.81-0.95) | 0     | 1.01(0.44-2.34) | 0 | 1.00(0.91-1.10) | 0 |
| ASCA-IgG/IgA | 3 | 1.04(0.62-1.74) | 0 | 0.32(0.24-0.41) | 19.10 | 0.68(0.58-0.77) | 10.40 | 1.03(0.70-1.52) | 0 | 0.99(0.82-1.8)  | 0 |

508

509

Table 3 Summary of the diagnostic performance of ASCA in AID.

510

SEN: sensitivity; SPE: specificity; LR+: positive likelihood; LR-: negative likelihood

| Reference                | Autoimmune disease             | Type    | SEN (%)     | SPE (%)      | LR+        | LR-       | Supplementary information                                                                                                              |
|--------------------------|--------------------------------|---------|-------------|--------------|------------|-----------|----------------------------------------------------------------------------------------------------------------------------------------|
| [31]                     | Scleroderma                    | IgG     | 43.24       | 98.25        | 24.65      | 0.58      | African descendants showed higher positivity rates for ASCA-IgG. ASCA-IgA was less frequently detected in patients with severe disease |
|                          |                                | IgA     | 16.22       | 94.74        | 3.08       | 0.88      |                                                                                                                                        |
| [34, 35, 36, 37]         | Ankylosing spondylitis         | IgG     | 0–11.63     | 89.74–98.72  | 1.13–3.00  | 0.97–0.98 | ASCA IgA levels were significantly increased in patients with HLA-B27-associated SpA, particularly in AS and uSpA                      |
|                          |                                | IgA     | 1.28–23.26  | 91.03–100.00 | 2.59–3.71  | 0.84–0.99 |                                                                                                                                        |
|                          |                                |         |             |              |            |           | ASCA positivity may be associated with peripheral involvement and uveitis.                                                             |
| [38]                     | Antiphospholipid syndrome      | IgG/IgA | 20.00       | 95.00        | /          | /         |                                                                                                                                        |
| [39]                     | Juvenile Idiopathic Arthritis  | IgA     | 0–50.00     | 94.74        | 9.50       | 0.53      |                                                                                                                                        |
|                          |                                | IgG     | 16.42–27.53 | 100.00       | /          | 0.84      |                                                                                                                                        |
| [26, 40, 41]             | Autoimmune hepatitis           | IgA     | 11.94       | 94.74        | 2.27       | 0.93      |                                                                                                                                        |
|                          |                                | IgG/IgA | 18.52       | 84.00        | 1.16       | 0.97      |                                                                                                                                        |
|                          |                                | IgG     | 10.57–18.95 | 97.50–100.00 | 7.58       | 0.83–0.89 |                                                                                                                                        |
| [26, 41, 42]             | Primary biliary cirrhosis      | IgA     | 11.58–18.70 | 94.74–98.75  | 3.55–9.26  | 0.86–0.90 |                                                                                                                                        |
|                          |                                | IgG/IgA | 20.26–24.21 | 84.00–96.25  | 1.27–6.46  | 0.79–0.95 |                                                                                                                                        |
|                          |                                | IgG     | 28.00       | 100.00       | /          | 0.72      |                                                                                                                                        |
| [26, 41]                 | Primary sclerosing cholangitis | IgA     | 32.00       | 94.74        | 6.08       | 0.72      |                                                                                                                                        |
|                          |                                | IgG/IgA | 30.51       | 84.00        | 1.91       | 0.83      |                                                                                                                                        |
|                          |                                | IgG     | 13.75–69.57 | 97.96–100    | 6.74       | 0.30–0.88 | Patients with more complicated disease course showed a trend for greater seroreactivity towards ASCA.                                  |
| [14, 25, 26, 34, 31, 43] | Crohn's disease                | IgA     | 19.30–71.43 | 94.74–100.00 | 9.91–29.40 | 0.50–0.71 | ASCA was detected in 25% of first-degree relatives of patients with Crohn's disease                                                    |

|    |              |                              |         |             |             |            |           |                                                                                                                                 |
|----|--------------|------------------------------|---------|-------------|-------------|------------|-----------|---------------------------------------------------------------------------------------------------------------------------------|
| 3  | [43]         | Cryoglobulinemia             | IgG     | 7.10        | 99.50       | /          | /         |                                                                                                                                 |
| 5  | [43, 44, 45] | Graves' disease              | IgG     | 5.70–12.50  | 94.17–99.50 | 2.15–3.76  | 0.91–0.93 | ASCA was elevated in Graves' disease but not in Hashimoto's thyroiditis                                                         |
| 6  |              |                              | IgA     | 8.40–16.67  | 94.17–96.88 | 2.69–2.86  | 0.88–0.95 |                                                                                                                                 |
| 8  |              |                              | IgG     | 10.13–20.00 | 89.74–91.45 | 0.99–2.34  | 0.87–1.00 | ASCA IgA levels strongly correlated with C-reactive protein levels and erythrocyte sedimentation rate                           |
| 9  | [35, 46]     | Rheumatoid arthritis         | IgA     | 17.72–40.00 | 91.03–94.74 | 1.97–7.60  | 0.63–0.90 |                                                                                                                                 |
| 10 |              |                              | IgM     | 13.33       | 94.74       | 2.53       | 0.91      |                                                                                                                                 |
| 13 |              |                              | IgG     | 4.50–57.50  | 91.45–99.50 | 6.72–9.38  | 0.46–0.73 | ASCA IgG levels in SLE patients during remission were relatively lower, indicating a possible correlation with disease activity |
| 14 | [43, 47, 48] | Systemic lupus erythematosus | IgA     | 7.50–12.07  | 94.74–99.38 | 1.43–19.31 | 0.88–0.98 |                                                                                                                                 |
| 16 |              |                              | IgG/IgA | 31.90       | 96.25       | 8.51       | 0.71      |                                                                                                                                 |
| 18 |              |                              | IgG     | 20.98       | 98.09       | 10.98      | 0.81      |                                                                                                                                 |
| 19 | [49]         | Type 1 diabetes              | IgA     | 9.82        | 98.73       | 7.71       | 0.91      |                                                                                                                                 |
| 20 |              |                              | IgG/IgA | 24.55       | 97.45       | 9.64       | 0.77      |                                                                                                                                 |
| 23 | [50]         | Primary Sjögren's syndrome   | IgG/IgA | 4.81        | 100.00      | /          | 0.95      | ASCA positivity was associated with pSS specific clinical and serological features                                              |
| 25 | [43]         | Vasculitides                 | IgG     | 6.50        | 99.50       | /          | /         |                                                                                                                                 |

511

512 Table S1 Demographic characteristics of patients and healthy controls included in the  
 513 meta-analysis

514 BD: Behçet's disease; GIBD: gastrointestinal Behçet's disease; CD: Crohn's disease; UC: ulcerative colitis; iTB:  
 515 intestinal tuberculosis; HC: healthy control; /: No such group included; Blank: no such information in the article

|                                       | BD           | GIBD             | CD                  | UC                  | iTB      | HC                  |
|---------------------------------------|--------------|------------------|---------------------|---------------------|----------|---------------------|
| <b>Female, n (%)</b>                  |              |                  |                     |                     |          |                     |
| 2018 Shulan Zhang                     | /            |                  |                     |                     |          | /                   |
| 2017 Shulan Zhang                     |              |                  | 37 (28.9)           | 69 (49.3)           |          |                     |
| 2011 George Vaiopoulos                | 28 (48.3)    | /                | /                   | /                   | /        |                     |
| 2010 B. Kocazeybek                    | /            | 5(38.5)          | 39 (61.9)           | 51 (50.0)           | 3 (30.0) | 99 (60.0)           |
| 2006 Chang Hwan Choi                  | 16 (86.6)    | 47(44.3)         | /                   | /                   | /        | 24 (53.3)           |
| 2005 I. Fresko                        | 20 (23.5)    | 2(25.0)          | 10 (41.7)           | 10 (40.0)           | /        | 9 (42.9)            |
| 2005 Seung-Ho Rhee                    | /            | 28(63.6)         | /                   | /                   | /        |                     |
| 2002 I. Krause                        | 20 (74.1)    |                  |                     |                     |          |                     |
| 2002 Byeong Gwan Kim                  | /            | 20               | 28                  | 36                  | 7        |                     |
| <b>Median age at study (max, min)</b> |              |                  |                     |                     |          |                     |
| 2018 Shulan Zhang                     | /            |                  |                     |                     |          |                     |
| 2017 Shulan Zhang                     | /            |                  | 33 (69,13)          | 42 (76,13)          |          | /                   |
| 2011 George Vaiopoulos                | 38.5 (17,70) | /                | /                   | /                   | /        |                     |
| 2010 B. Kocazeybek                    | /            | 32.11 (23.22,41) | 37.56 (24.91,50.21) | 40.72 (27.28,54.16) | SD 9.96  | 35.07 (24.58,45.56) |
| 2006 Chang Hwan Choi                  | 38 (18,65)   | 37               | /                   | /                   | /        | 39 (16,69)          |

|                      |                  |                  |                  |                  |      |                  |
|----------------------|------------------|------------------|------------------|------------------|------|------------------|
| 2005 I. Fresko       | 34.3 (32.0,36.7) | 26.9 (24.1,29.6) | 38.9 (34.6,43.2) | 35.6 (33.0,38.3) | /    | 33.7 (30.4,37.0) |
| 2005 Seung-Ho Rhee   | /                | 37.6             | /                | /                | /    |                  |
| 2002 I. Krause       | 41.6 (36.9,46.2) |                  |                  |                  |      |                  |
| 2002 Byeong Gwan Kim | /                | 43.2             | 40.9             | 30.6             | 33.6 |                  |

516

517

518

For peer review only

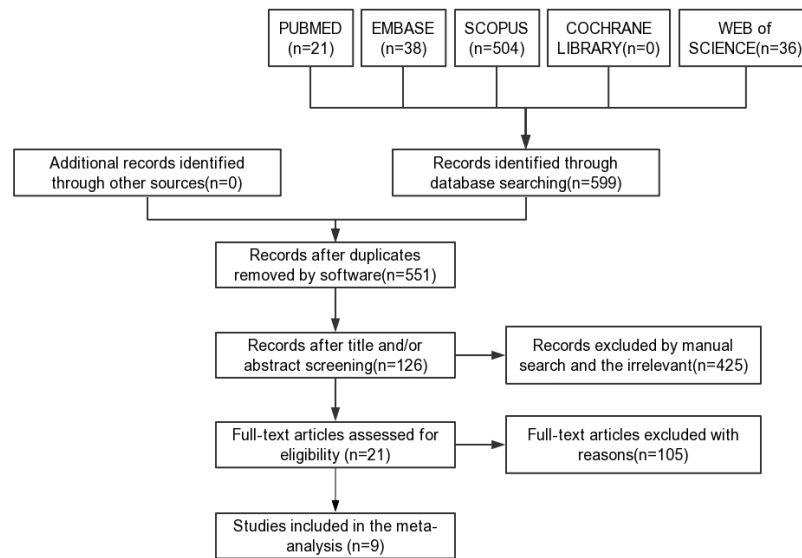

Figure 1 Schematic illustration of the literature search and study-selection criteria for the meta-analysis

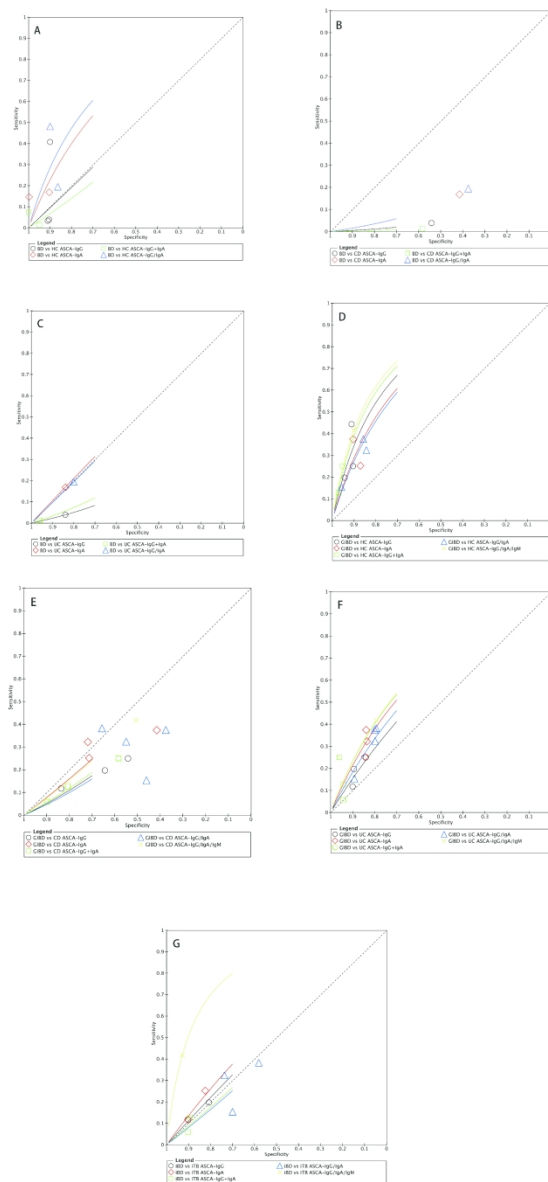

Figure 2 AUC of diagnostic accuracy of ASCA when comparing BD and HC (A), BD and CD (B), BD and UC (C), GIBD and HC (D), GIBD and CD (E), GIBD and UC (F), and GIBD and iTB (G)

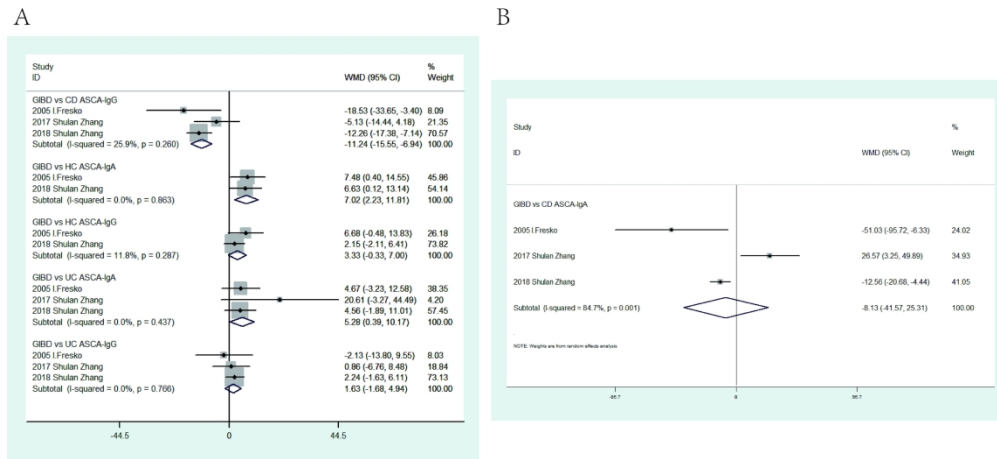

Figure 3 A. Forest plot of serum levels of ASCA in GIBD/CD/UC/HC using FEM; B. Forest plot of serum levels of ASCA in GIBD/BD/HC/CD using REM

314x144mm (300 x 300 DPI)

1  
2  
3  
4  
5  
6  
7  
8  
9  
10  
11  
12  
13  
14  
15  
16  
17  
18  
19  
20  
21  
22  
23  
24  
25  
26  
27  
28  
29  
30  
31  
32  
33  
34  
35  
36  
37  
38  
39  
40  
41  
42  
43  
44  
45  
46  
47  
48  
49  
50  
51  
52  
53  
54  
55  
56  
57  
58  
59  
60

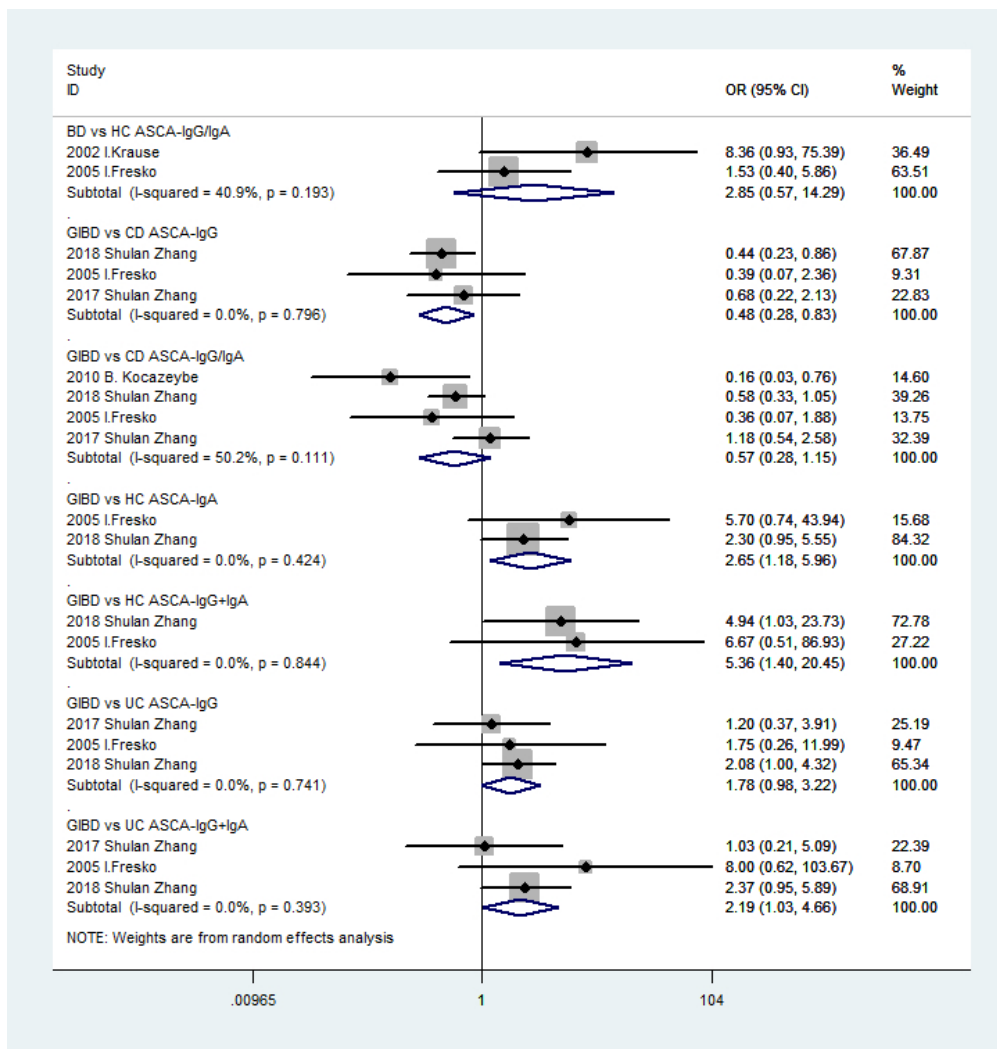

254x265mm (72 x 72 DPI)



1  
2  
3  
4  
5  
6  
7  
8  
9  
10  
11  
12  
13  
14  
15  
16  
17  
18  
19  
20  
21  
22  
23  
24  
25  
26  
27  
28  
29  
30  
31  
32  
33  
34  
35  
36  
37  
38  
39  
40  
41  
42  
43  
44  
45  
46  
47  
48  
49  
50  
51  
52  
53  
54  
55  
56  
57  
58  
59  
60

For peer review only

1  
2  
3  
4  
5  
6  
7  
8  
9  
10  
11  
12  
13  
14  
15  
16  
17  
18  
19  
20  
21  
22  
23  
24  
25  
26  
27  
28  
29  
30  
31  
32  
33  
34  
35  
36  
37  
38  
39  
40  
41  
42  
43  
44  
45  
46  
47  
48  
49  
50  
51  
52  
53  
54  
55  
56  
57  
58  
59  
60

For peer review only

1  
2  
3  
4  
5  
6  
7  
8  
9  
10  
11  
12  
13  
14  
15  
16  
17  
18  
19  
20  
21  
22  
23  
24  
25  
26  
27  
28  
29  
30  
31  
32  
33  
34  
35  
36  
37  
38  
39  
40  
41  
42  
43  
44  
45  
46  
47  
48  
49  
50  
51  
52  
53  
54  
55  
56  
57  
58  
59  
60

For peer review only

# Reporting checklist for meta-analysis of observational studies.

Based on the MOOSE guidelines.

## Instructions to authors

Complete this checklist by entering the page numbers from your manuscript where readers will find each of the items listed below.

Your article may not currently address all the items on the checklist. Please modify your text to include the missing information. If you are certain that an item does not apply, please write "n/a" and provide a short explanation.

Upload your completed checklist as an extra file when you submit to a journal.

In your methods section, say that you used the MOOSE reporting guidelines, and cite them as:

Stroup DF, Berlin JA, Morton SC, Olkin I, Williamson GD, Rennie D, Moher D, Becker BJ, Sipe TA, Thacker SB. Meta-analysis of observational studies in epidemiology: a proposal for reporting. Meta-analysis Of Observational Studies in Epidemiology (MOOSE) group. JAMA. 2000; 283(15):2008-2012.

|                   | Reporting Item                                                                                                                                                                                                                                                                                                                                        | Page Number |
|-------------------|-------------------------------------------------------------------------------------------------------------------------------------------------------------------------------------------------------------------------------------------------------------------------------------------------------------------------------------------------------|-------------|
| <b>Title</b>      |                                                                                                                                                                                                                                                                                                                                                       |             |
|                   | <a href="#">#1</a> Identify the study as a meta-analysis of observational research                                                                                                                                                                                                                                                                    | 1           |
| <b>Abstract</b>   |                                                                                                                                                                                                                                                                                                                                                       |             |
|                   | <a href="#">#2</a> Provide a structured summary including, as applicable: background; objectives; data sources; study eligibility criteria, participants, and interventions; study appraisal and synthesis methods; results; limitations; conclusions and implications of key findings; systematic review registration number (From PRISMA checklist) | 1-2         |
| <b>Background</b> |                                                                                                                                                                                                                                                                                                                                                       |             |
|                   | <a href="#">#3a</a> Problem definition                                                                                                                                                                                                                                                                                                                | 3           |
|                   | <a href="#">#3b</a> Hypothesis statement                                                                                                                                                                                                                                                                                                              | 4-5         |
|                   | <a href="#">#3c</a> Description of study outcomes                                                                                                                                                                                                                                                                                                     | n/a         |

|    |                     |                                                                                                      |     |
|----|---------------------|------------------------------------------------------------------------------------------------------|-----|
| 1  | <a href="#">#3d</a> | Type of exposure or intervention used                                                                | 5   |
| 2  |                     |                                                                                                      |     |
| 3  | <a href="#">#3e</a> | Type of study designs used                                                                           | 5   |
| 4  |                     |                                                                                                      |     |
| 5  | <a href="#">#3f</a> | Study population                                                                                     | 5   |
| 6  |                     |                                                                                                      |     |
| 7  |                     |                                                                                                      |     |
| 8  | <b>Methods</b>      |                                                                                                      |     |
| 9  |                     |                                                                                                      |     |
| 10 | Search              | <a href="#">#4a</a> Qualifications of searchers (eg, librarians and investigators)                   | 6-7 |
| 11 | strategy            |                                                                                                      |     |
| 12 |                     |                                                                                                      |     |
| 13 |                     |                                                                                                      |     |
| 14 | Search              | <a href="#">#4b</a> Search strategy, including time period included in the synthesis and keywords    | 6   |
| 15 | strategy            |                                                                                                      |     |
| 16 |                     |                                                                                                      |     |
| 17 |                     |                                                                                                      |     |
| 18 | Search              | <a href="#">#4c</a> Effort to include all available studies, including contact with authors          | 7   |
| 19 | strategy            |                                                                                                      |     |
| 20 |                     |                                                                                                      |     |
| 21 |                     |                                                                                                      |     |
| 22 | Search              | <a href="#">#4d</a> Databases and registries searched                                                | 6   |
| 23 | strategy            |                                                                                                      |     |
| 24 |                     |                                                                                                      |     |
| 25 |                     |                                                                                                      |     |
| 26 | Search              | <a href="#">#4e</a> Search software used, name and version, including special features used (eg,     | n/a |
| 27 | strategy            | explosion)                                                                                           |     |
| 28 |                     |                                                                                                      |     |
| 29 | Search              | <a href="#">#4f</a> Use of hand searching (eg, reference lists of obtained articles)                 | n/a |
| 30 | strategy            |                                                                                                      |     |
| 31 |                     |                                                                                                      |     |
| 32 |                     |                                                                                                      |     |
| 33 | Search              | <a href="#">#4g</a> List of citations located and those excluded, including justification            | 6   |
| 34 | strategy            |                                                                                                      |     |
| 35 |                     |                                                                                                      |     |
| 36 |                     |                                                                                                      |     |
| 37 | Search              | <a href="#">#4h</a> Method of addressing articles published in languages other than English          | 6   |
| 38 | strategy            |                                                                                                      |     |
| 39 |                     |                                                                                                      |     |
| 40 |                     |                                                                                                      |     |
| 41 | Search              | <a href="#">#4i</a> Method of handling abstracts and unpublished studies                             | 6   |
| 42 | strategy            |                                                                                                      |     |
| 43 |                     |                                                                                                      |     |
| 44 |                     |                                                                                                      |     |
| 45 | Search              | <a href="#">#4j</a> Description of any contact with authors                                          | 7   |
| 46 | strategy            |                                                                                                      |     |
| 47 |                     |                                                                                                      |     |
| 48 |                     |                                                                                                      |     |
| 49 |                     | <a href="#">#5a</a> Description of relevance or appropriateness of studies gathered for assessing    | 7   |
| 50 |                     | the hypothesis to be tested                                                                          |     |
| 51 |                     |                                                                                                      |     |
| 52 |                     | <a href="#">#5b</a> Rationale for the selection and coding of data (eg, sound clinical principles or | n/a |
| 53 |                     | convenience)                                                                                         |     |
| 54 |                     |                                                                                                      |     |
| 55 |                     |                                                                                                      |     |
| 56 |                     | <a href="#">#5c</a> Documentation of how data were classified and coded (eg, multiple raters,        | n/a |
| 57 |                     | blinding, and interrater reliability)                                                                |     |
| 58 |                     |                                                                                                      |     |
| 59 |                     |                                                                                                      |     |
| 60 |                     |                                                                                                      |     |

|    |                     |                                                                                                                                                                                                                                                                              |     |
|----|---------------------|------------------------------------------------------------------------------------------------------------------------------------------------------------------------------------------------------------------------------------------------------------------------------|-----|
| 1  | <a href="#">#5d</a> | Assessment of confounding (eg, comparability of cases and controls in studies where appropriate)                                                                                                                                                                             | 8   |
| 2  |                     |                                                                                                                                                                                                                                                                              |     |
| 3  |                     |                                                                                                                                                                                                                                                                              |     |
| 4  |                     |                                                                                                                                                                                                                                                                              |     |
| 5  | <a href="#">#5e</a> | Assessment of study quality, including blinding of quality assessors; stratification or regression on possible predictors of study results                                                                                                                                   | 7   |
| 6  |                     |                                                                                                                                                                                                                                                                              |     |
| 7  |                     |                                                                                                                                                                                                                                                                              |     |
| 8  |                     |                                                                                                                                                                                                                                                                              |     |
| 9  | <a href="#">#5f</a> | Assessment of heterogeneity                                                                                                                                                                                                                                                  | 8   |
| 10 |                     |                                                                                                                                                                                                                                                                              |     |
| 11 | <a href="#">#5g</a> | Description of statistical methods (eg, complete description of fixed or random effects models, justification of whether the chosen models account for predictors of study results, dose-response models, or cumulative meta-analysis) in sufficient detail to be replicated | 8   |
| 12 |                     |                                                                                                                                                                                                                                                                              |     |
| 13 |                     |                                                                                                                                                                                                                                                                              |     |
| 14 |                     |                                                                                                                                                                                                                                                                              |     |
| 15 |                     |                                                                                                                                                                                                                                                                              |     |
| 16 |                     |                                                                                                                                                                                                                                                                              |     |
| 17 |                     |                                                                                                                                                                                                                                                                              |     |
| 18 | <a href="#">#5h</a> | Provision of appropriate tables and graphics                                                                                                                                                                                                                                 | n/a |
| 19 |                     |                                                                                                                                                                                                                                                                              |     |
| 20 | <b>Results</b>      |                                                                                                                                                                                                                                                                              |     |
| 21 |                     |                                                                                                                                                                                                                                                                              |     |
| 22 | <a href="#">#6a</a> | Graphic summarizing individual study estimates and overall estimate                                                                                                                                                                                                          | 26  |
| 23 |                     |                                                                                                                                                                                                                                                                              |     |
| 24 | <a href="#">#6b</a> | Table giving descriptive information for each study included                                                                                                                                                                                                                 | 25  |
| 25 |                     |                                                                                                                                                                                                                                                                              |     |
| 26 |                     |                                                                                                                                                                                                                                                                              |     |
| 27 | <a href="#">#6c</a> | Results of sensitivity testing (eg, subgroup analysis)                                                                                                                                                                                                                       | 27  |
| 28 |                     |                                                                                                                                                                                                                                                                              |     |
| 29 | <a href="#">#6d</a> | Indication of statistical uncertainty of findings                                                                                                                                                                                                                            | n/a |
| 30 |                     |                                                                                                                                                                                                                                                                              |     |
| 31 |                     |                                                                                                                                                                                                                                                                              |     |
| 32 | <b>Discussion</b>   |                                                                                                                                                                                                                                                                              |     |
| 33 |                     |                                                                                                                                                                                                                                                                              |     |
| 34 | <a href="#">#7a</a> | Quantitative assessment of bias (eg, publication bias)                                                                                                                                                                                                                       | 16  |
| 35 |                     |                                                                                                                                                                                                                                                                              |     |
| 36 | <a href="#">#7b</a> | Justification for exclusion (eg, exclusion of non-English-language citations)                                                                                                                                                                                                | n/a |
| 37 |                     |                                                                                                                                                                                                                                                                              |     |
| 38 |                     |                                                                                                                                                                                                                                                                              |     |
| 39 | <a href="#">#7c</a> | Assessment of quality of included studies                                                                                                                                                                                                                                    | 16  |
| 40 |                     |                                                                                                                                                                                                                                                                              |     |
| 41 | <b>Conclusion</b>   |                                                                                                                                                                                                                                                                              |     |
| 42 |                     |                                                                                                                                                                                                                                                                              |     |
| 43 | <a href="#">#8a</a> | Consideration of alternative explanations for observed results                                                                                                                                                                                                               | n/a |
| 44 |                     |                                                                                                                                                                                                                                                                              |     |
| 45 | <a href="#">#8b</a> | Generalization of the conclusions (ie, appropriate for the data presented and within the domain of the literature review)                                                                                                                                                    | 19  |
| 46 |                     |                                                                                                                                                                                                                                                                              |     |
| 47 |                     |                                                                                                                                                                                                                                                                              |     |
| 48 |                     |                                                                                                                                                                                                                                                                              |     |
| 49 | <a href="#">#8c</a> | Guidelines for future research                                                                                                                                                                                                                                               | 19  |
| 50 |                     |                                                                                                                                                                                                                                                                              |     |
| 51 | <a href="#">#8d</a> | Disclosure of funding source                                                                                                                                                                                                                                                 | 19  |
| 52 |                     |                                                                                                                                                                                                                                                                              |     |
| 53 |                     |                                                                                                                                                                                                                                                                              |     |

Reproduced with permission from JAMA. 2000. 283(15):2008-2012. Copyright © 2000 American Medical Association. All rights reserved. This checklist was completed on 26. August 2019 using <https://www.goodreports.org/>, a tool made by the [EQUATOR Network](#) in collaboration with [Penelope.ai](#)

# BMJ Open

## Meta-analysis of anti- *Saccharomyces cerevisiae* antibodies as diagnostic markers of Behçet's disease with gastrointestinal involvement

|                                 |                                                                                                                                                                                                                                                                                                                                                                                                                                                                                                                                                                                                                                                                                                                                                                                                                            |
|---------------------------------|----------------------------------------------------------------------------------------------------------------------------------------------------------------------------------------------------------------------------------------------------------------------------------------------------------------------------------------------------------------------------------------------------------------------------------------------------------------------------------------------------------------------------------------------------------------------------------------------------------------------------------------------------------------------------------------------------------------------------------------------------------------------------------------------------------------------------|
| Journal:                        | <i>BMJ Open</i>                                                                                                                                                                                                                                                                                                                                                                                                                                                                                                                                                                                                                                                                                                                                                                                                            |
| Manuscript ID                   | bmjopen-2019-033880.R1                                                                                                                                                                                                                                                                                                                                                                                                                                                                                                                                                                                                                                                                                                                                                                                                     |
| Article Type:                   | Original research                                                                                                                                                                                                                                                                                                                                                                                                                                                                                                                                                                                                                                                                                                                                                                                                          |
| Date Submitted by the Author:   | 24-Feb-2020                                                                                                                                                                                                                                                                                                                                                                                                                                                                                                                                                                                                                                                                                                                                                                                                                |
| Complete List of Authors:       | Cheng, Linlin; Peking Union Medical College Hospital, Peking Union Medical College and Chinese Academy of Medical Sciences, Department of Clinical Laboratory<br>Li, Liubing; Peking Union Medical College Hospital, Peking Union Medical College and Chinese Academy of Medical Sciences, Department of Clinical Laboratory<br>Liu, Chenxi; Peking Union Medical College Hospital, Peking Union Medical College and Chinese Academy of Medical Sciences, Department of Clinical Laboratory<br>Yan, Songxin; Peking Union Medical College Hospital, Peking Union Medical College and Chinese Academy of Medical Sciences, Department of Clinical Laboratory<br>Li, Yongzhe; Peking Union Medical College Hospital, Peking Union Medical College and Chinese Academy of Medical Sciences, Department of Clinical Laboratory |
| <b>Primary Subject Heading</b>: | Rheumatology                                                                                                                                                                                                                                                                                                                                                                                                                                                                                                                                                                                                                                                                                                                                                                                                               |
| Secondary Subject Heading:      | Diagnostics, Epidemiology, Gastroenterology and hepatology, Immunology (including allergy)                                                                                                                                                                                                                                                                                                                                                                                                                                                                                                                                                                                                                                                                                                                                 |
| Keywords:                       | Behçet's disease, Anti-saccharomyces cerevisiae antibodies, autoimmune diseases, meta-analysis, autoantibodies                                                                                                                                                                                                                                                                                                                                                                                                                                                                                                                                                                                                                                                                                                             |
|                                 |                                                                                                                                                                                                                                                                                                                                                                                                                                                                                                                                                                                                                                                                                                                                                                                                                            |

SCHOLARONE™  
Manuscripts

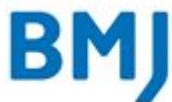

I, the Submitting Author has the right to grant and does grant on behalf of all authors of the Work (as defined in the below author licence), an exclusive licence and/or a non-exclusive licence for contributions from authors who are: i) UK Crown employees; ii) where BMJ has agreed a CC-BY licence shall apply, and/or iii) in accordance with the terms applicable for US Federal Government officers or employees acting as part of their official duties; on a worldwide, perpetual, irrevocable, royalty-free basis to BMJ Publishing Group Ltd ("BMJ") its licensees and where the relevant Journal is co-owned by BMJ to the co-owners of the Journal, to publish the Work in this journal and any other BMJ products and to exploit all rights, as set out in our [licence](#).

The Submitting Author accepts and understands that any supply made under these terms is made by BMJ to the Submitting Author unless you are acting as an employee on behalf of your employer or a postgraduate student of an affiliated institution which is paying any applicable article publishing charge ("APC") for Open Access articles. Where the Submitting Author wishes to make the Work available on an Open Access basis (and intends to pay the relevant APC), the terms of reuse of such Open Access shall be governed by a Creative Commons licence – details of these licences and which [Creative Commons](#) licence will apply to this Work are set out in our licence referred to above.

Other than as permitted in any relevant BMJ Author's Self Archiving Policies, I confirm this Work has not been accepted for publication elsewhere, is not being considered for publication elsewhere and does not duplicate material already published. I confirm all authors consent to publication of this Work and authorise the granting of this licence.



1  
2  
3  
4 1 **Meta-analysis of anti- *Saccharomyces cerevisiae* antibodies as diagnostic**  
5  
6  
7 2 **markers of Behçet's disease with gastrointestinal involvement**  
8  
9  
10 3

11  
12  
13  
14 4 **Linlin Cheng, MD,<sup>a</sup> Liubing Li, MD,<sup>a</sup> Chenxi Liu, MD,<sup>a</sup> Songxin Yan, MS,<sup>a</sup> Yongzhe**  
15  
16 5 **Li, PhD<sup>a\*</sup>.**

17  
18  
19  
20 6 **<sup>a</sup>Department of Clinical Laboratory, Peking Union Medical College Hospital, Peking**  
21  
22 7 **Union Medical College and Chinese Academy of Medical Sciences, Beijing, China**

23  
24  
25  
26 8 **For correspondence: Yongzhe Li\***

27  
28  
29  
30 9 **Email address: [yongzhelipumch@126.com](mailto:yongzhelipumch@126.com)**  
31  
32  
33  
34 10  
35  
36  
37 11  
38  
39  
40  
41 12  
42  
43  
44 13  
45  
46  
47  
48 14  
49  
50  
51 15  
52  
53  
54  
55 16  
56  
57  
58  
59  
60

1  
2  
3  
4 17 **Meta-analysis of anti- *Saccharomyces cerevisiae* antibodies as diagnostic**  
5  
6  
7 18 **markers of Behçet's disease with gastrointestinal involvement**  
8  
9  
10  
11 19  
12  
13

14 20 **Abstract**  
15

16  
17 21 **Objective:** Due to common exposure to yeast in the alcoholic and baking industry, positive  
18  
19  
20 22 rate of anti-*Saccharomyces cerevisiae* antibodies (ASCA) is reportedly high in patients  
21  
22  
23 23 with Behçet's disease (BD) who have gastrointestinal symptoms (gastrointestinal BD  
24  
25 24 [GIBD]). We performed a meta-analysis to assess the diagnostic value of ASCA in  
26  
27  
28 25 differentiating patients with BD from those with other chronic inflammatory bowel  
29  
30  
31 26 diseases.  
32  
33

34 27 **Methods:** The meta-analysis is compliant with the PRISMA and MOOSE checklist.  
35

36  
37 28 Relevant studies that investigated ASCA levels in BD patients were retrieved from  
38  
39  
40 29 PubMed, EMBASE, Web of Science, SCOPUS, and the Cochrane Library on July 12,  
41  
42  
43 30 2019; the search was rerun on February 12, 2020. Stata/SE 12.0 and Meta-DiSc 1.4 were  
44  
45  
46 31 used to perform the meta-analysis and sensitivity analysis, disaggregated by isotypes of  
47  
48  
49 32 ASCA.  
50

51  
52 33 **Results:** Nine studies were included in the meta-analysis. The results revealed a strong  
53  
54  
55 34 association between ASCA and GIBD, especially ASCA-IgG [odds ratio (OR)=5.50 (95%  
56  
57  
58  
59  
60

1  
2  
3  
4 35 CI 2.58–11.55, p=0.000) and ASCA-IgG+IgA [OR=5.36 (95% CI 1.40–20.45), p=0.014].

6  
7 36 The positivity rate of ASCA in GIBD was significantly higher than that in ulcerative colitis:

9  
10 37 IgA [OR=2.13 (95% CI 1.30–3.50), p=0.003]; IgG+IgA [OR=2.19 (95% CI 1.03–4.66),

12  
13 38 p=0.042]; IgG/IgA [OR=2.03 (95% CI 1.30–3.17), p=0.002]. However, the frequency of

15  
16 39 ASCA-IgG was significantly higher in patients with Crohn's disease than GIBD [OR=5.36

18  
19 40 (95% CI 1.40–20.45), p=0.009]. There was no significant difference in ASCA positivity

21  
22 41 between BD without gastrointestinal involvement and healthy controls and between GIBD

23  
24 42 and intestinal tuberculosis (p>0.05).

26  
27 43 **Conclusion:** ASCA may play a role in the pathogenesis of gastrointestinal involvement.

29  
30 44 Negative result of IgG favors the diagnosis of GIBD/BD when differentiated from Crohn's

32  
33 45 disease. ASCA-IgA showed moderate diagnostic performance in distinguishing GIBD and

35  
36 46 ulcerative colitis and the diagnostic performance was better in combination with IgG.

37  
38 47 However, ASCA may not be a useful serologic marker distinguishing GIBD and intestinal

39  
40 48 tuberculosis.

43  
44 49 Key words: Behçet's disease; Anti-*Saccharomyces cerevisiae* antibodies; autoimmune

46  
47 50 diseases; meta-analysis; autoantibodies

49  
50 51

53  
54 52

53

**54 Strengths and limitations of this study**

- 55 • In addition to the healthy controls, we included patients with other gastrointestinal  
56 diseases that are considered in the differential diagnosis of gastrointestinal Behcet's  
57 disease in clinical settings (such as ulcerative colitis, Crohn's disease, and intestinal  
58 tuberculosis), in order to improve the clinical awareness of ASCA.
- 59 • Inclusion of both categorical data (positivity rate) and continuous data (serum  
60 concentration) pertaining to anti-*Saccharomyces cerevisiae* antibodies (ASCA)  
61 increases the reliability of the results of meta-analysis.
- 62 • We separately performed meta-analysis of IgG, IgA, and IgG+IgA, which provides  
63 insights into their ability to differentiate BD from other gastrointestinal diseases.
- 64 • Comprehensive summary of evidence linking ASCA and autoimmune diseases  
65 provides preliminary insights into the pathogenicity of *Saccharomyces cerevisiae*.
- 66 • Analysis of too many subgroups contributed to potential heterogeneity due to the small  
67 number of studies included in each subgroup.

68

69

1  
2  
3  
4 70  
5  
6  
78 71 **Introduction**  
9

10  
11 72 Behçet's disease (BD) is a chronic systemic vascular autoimmune/inflammatory disease  
12  
13 73 with a high propensity for recurrence; the pathogenetic mechanisms of this disease are not  
14  
15  
16 74 well elucidated [1]. Virtually no specific histological or laboratory features of BD have  
17  
18  
19 75 been identified. Therefore, the diagnosis of BD is typically challenging as it is mainly based  
20  
21  
22 76 on clinical features [2, 3]. The diagnosis is frequently delayed until the development of  
23  
24  
25 77 clinical manifestations that qualify the diagnostic criteria. The estimated duration between  
26  
27  
28 78 the onset of symptoms and the fulfilment of diagnostic criteria is approximately 4 years  
29  
30 79 [4].

31  
32  
33  
34 80 Moreover, patients with prominent involvement of a particular organ system are easily  
35  
36  
37 81 misdiagnosed. For example, patients who have gastrointestinal symptoms as the main  
38  
39  
40 82 manifestation are liable to be misdiagnosed as having Crohn's disease (CD), ulcerative  
41  
42  
43 83 colitis (UC), or intestinal tuberculosis (iTb). These features make formulating disease  
44  
45 84 criteria difficult, causing deleterious effects on the patients.

46  
47  
48 85 Several recent studies (but not all) have reported the diagnostic value of anti-  
49  
50  
51 86 *Saccharomyces cerevisiae* antibody (ASCA) in BD. *Saccharomyces cerevisiae*, also  
52  
53  
54 87 known as the baker's or brewer's yeast, has long been utilized to ferment the sugars in  
55  
56  
57

1  
2  
3  
4 88 cereals to produce alcoholic beverages; it is also used in the baking industry to raise dough.  
5  
6  
7 89 As a consequence, we are now commonly exposed to yeast [5]. IgG and IgA antibodies  
8  
9  
10 90 against the phosphopeptidomannan of the *S. cerevisiae* cell wall have been discovered as  
11  
12 91 autoantibodies in the sera of patients with BD, especially those with gastrointestinal  
13  
14  
15 92 involvement. This suggests a role of environmental stimuli in the pathogenesis of BD.  
16  
17  
18 93 However, patients with inflammatory bowel disease such as Crohn's disease (CD) also  
19  
20  
21 94 have a high prevalence rate of ASCA due to their similarities [6, 7, 8, 9, 10, 11]. In this  
22  
23  
24 95 context, identification of ASCA as a diagnostic marker for BD is a key imperative. The  
25  
26  
27 96 objectives of this study were to summarize the findings pertaining to the relevance of  
28  
29  
30 97 ASCA in BD and other gastrointestinal diseases and to perform a meta-analysis to assess  
31  
32  
33 98 its diagnostic accuracy for BD.  
34  
35  
36  
37  
38  
39  
40  
41  
42  
43  
44  
45  
46  
47  
48  
49  
50  
51  
52  
53  
54  
55  
56  
57  
58  
59  
60

## 100 **Methods**

### 101 Study design

102 The Preferred Reporting Items for Systematic Reviews and Meta-Analysis Diagnostic Test  
103 Accuracy (PRISMA-DTA) guidelines [12] (Table S1) and Meta-analysis of Observational  
104 Studies in Epidemiology (MOOSE) [13](Table S2) were followed throughout the literature  
105 search process to structure and design the framework for the review [14]. Besides, a

1  
2  
3  
4 106 predefined protocol was registered with PROSPERO (Registration No.  
5  
6  
7 107 CRD42020115245).  
8  
9

10  
11 108

12  
13  
14 109 Literature search

15  
16  
17 110 A comprehensive literature search was performed to identify studies pertaining to ASCA  
18  
19  
20 111 as biomarkers for BD in 5 biomedical databases, i.e., PubMed, EMBASE, Web of Science,  
21  
22  
23 112 SCOPUS, and the Cochrane Library on July 12, 2019. The search terms for Behçet's  
24  
25  
26 113 disease were: Behçet, triple symptom complex, triple symptom complices, Adamantiades  
27  
28 114 Behçet and old silk route disease; the search terms for *Saccharomyces cerevisiae* were: *S.*  
29  
30  
31 115 *cerevisiae*, *Saccaromyces cerevisiae*, *Saccharomyces capensis*, *Saccharomyces*  
32  
33  
34 116 *diastaticus*, *Saccharomyces italicus*, *Saccharomyces oviformis*, *Saccharomyces uvarum*,  
35  
36  
37 117 brewer yeast or baker yeast, mannan, manna, polymannan, glucomannan, yeast mannan,  
38  
39 118 dicoman, humamil, ASCA. Combination of keywords using "AND" was used to retrieve  
40  
41  
42 119 studies in the range of "all fields" or "all text". The search was rerun on February 12, 2020  
43  
44  
45 120 to ensure inclusion of recent studies. No restrictions were imposed with respect to time of  
46  
47  
48 121 publication, region, or ethnicity of the study population. In addition, the reference list of  
49  
50  
51 122 obtained articles was also examined to identify possible relevant studies.  
52  
53

54 123  
55  
56  
57  
58  
59  
60

1  
2  
3  
4 124 Eligibility and exclusion criteria  
5  
6

7 125 The inclusion criteria were: (1) studies that evaluated the diagnostic accuracy of ASCA in  
8  
9  
10 126 BD; (2) availability of adequate data pertaining to the prevalence rate or serum levels of  
11  
12  
13 127 ASCA in patients with BD; (3) studies with healthy population and/or disease controls; (4)  
14  
15  
16 128 meeting abstracts or letters to the editor were also included.  
17

18  
19 129 The exclusion criteria were: (1) studies with incomplete data; (2) review articles; (3) non-  
20  
21  
22 130 English articles; (4) in case of studies with overlapping study population, studies with  
23  
24  
25 131 smaller sample size were excluded. Two investigators independently performed the  
26  
27  
28 132 literature search, screened the titles and abstracts, followed by full-text review of eligible  
29  
30  
31 133 studies.  
32

33  
34 134

35  
36  
37 135 Data extraction and quality assessment  
38

39  
40  
41 136 Two independent investigators reviewed the full-text articles, extracted the data, and  
42  
43  
44 137 assessed the study quality using the modified version (nine-star scoring system) of the  
45  
46  
47 138 Newcastle-Ottawa Scale (NOS) for case-control studies and the Quality Assessment of  
48  
49  
50 139 Diagnostic Accuracy Studies (QUADAS-2) and; For NOS, studies with higher NOS scores  
51  
52  
53 140 (☆) were considered as higher quality (low risk of bias). For QUADAS-2, the included  
54  
55  
56 141 items were evaluated as yes, no, or uncertain. Inter-researcher disagreements were resolved  
57  
58  
59  
60



1  
2  
3  
4 142 by consensus, or by a third investigator. Data pertaining to the following variables were  
5  
6  
7 143 extracted: publication year, article type, first author's name, country, isotypes of ASCA  
8  
9  
10 144 detected, age and sex, research design, sample size, experimental method, trade names of  
11  
12  
13 145 experimental materials, cut-off values, diagnostic criteria, and serum titers and/or  
14  
15 146 prevalence rate of ASCA in BD, gastrointestinal BD (GIBD), healthy controls (HC),  
16  
17  
18 147 patients with Crohn's disease (CD), ulcerative colitis (UC), and intestinal tuberculosis  
19  
20  
21 148 (iTB). The data were either obtained directly from the article, calculated, or requested from  
22  
23  
24 149 the author via e-mail.  
25  
26  
27  
28  
29

### 30 151 Statistical analysis

31  
32  
33  
34 152 Pooled odds ratios (OR) with 95% confidence intervals (CI) were calculated to evaluate  
35  
36  
37 153 the association between ASCA and BD (without gastrointestinal  
38  
39  
40 154 involvement)/GIBD/CD/UC/iTB using Stata/SE 12.0. Meta-DiSc 1.4 was used to calculate  
41  
42  
43 155 the sensitivity, specificity, AUC values, and the area under the summary receiver operating  
44  
45  
46 156 characteristic (SROC) curve to assess the overall diagnostic performance of ASCA.  
47  
48  
49 157 Heterogeneity among the included studies was evaluated using the Cochran's Q-statistic.  
50  
51  
52 158 P values > 0.10 were considered indicative of lack of significant heterogeneity. We chose  
53  
54  
55 159 the random effects models (REM) since REM tends to generalize findings beyond the  
56  
57  
58 160 included studies by assuming that the selected studies are random samples from a larger

1  
2  
3  
4 161 population [15]. Subgroup analysis was performed disaggregated by the isotypes of ASCA  
5  
6  
7 162 and different disease controls. The isotypes of ASCA were classified and defined as  
8  
9  
10 163 follows: IgG, IgA, IgG/IgA (positive results of either IgG or IgA), and IgG+IgA (positive  
11  
12 164 results of both IgG and IgA).

13  
14  
15  
16 165 In order to increase the robustness of the meta-analysis, we also extracted the data  
17  
18 166 pertaining to serum levels of ASCA from five studies and performed meta-analysis using  
19  
20  
21 167 the Continuous data module of Stata/SE 12.0. The REM was used for the analysis and  
22  
23  
24 168 weighted mean difference (WMD) was used as the effect measure if the same unit was  
25  
26  
27 169 used in these studies and there were minor differences with respect to the serum levels of  
28  
29 170 ASCA. Sensitivity analysis was performed using Stata/SE 12.0 to evaluate stability of the  
30  
31  
32 171 results after sequential exclusion of one study at a time.

33  
34  
35  
36 172

### 37 38 39 173 Patient and public involvement

40  
41  
42 174 The present study was a meta-analysis and systematic review based on published data.  
43  
44  
45 175 Patients and public were not involved in the study design, conduct, data analysis, and result  
46  
47  
48 176 dissemination.

49  
50  
51  
52 177

### 53 54 55 178 Relationship between ASCA and autoimmune disease

1  
2  
3  
4 179 We searched the PubMed for studies pertaining to the relationship between ASCA and  
5  
6  
7 180 autoimmune diseases. The two search terms used were autoimmune disease and  
8  
9  
10 181 *Saccharomyces cerevisiae*. We performed an interval statistic of four indicators of ASCA–  
11  
12 182 sensitivity, specificity, positive likelihood (LR+) and negative likelihood (LR-) based on  
13  
14  
15 183 the included studies sorted by diseases.  
16  
17  
18  
19 184

## 22 185 **Results**

### 26 186 Literature search and characteristics of studies

29 187 A total of 625 documents were retrieved on database and manual search. Fifty-one  
30  
31  
32 188 duplicate publications were excluded using the document management software. A total of  
33  
34  
35 189 127 records were retained after screening of titles and/or abstracts; the excluded records  
36  
37 190 included review articles, animal model studies, therapeutic or drug research, genetic  
38  
39  
40 191 research, book chapters, duplicate publications not recognized by software, and other  
41  
42  
43 192 irrelevant records. After full-text review for eligibility, 22 records were selected. Finally,  
44  
45 193 we included 9 available studies with adequate data in the meta-analysis (Figure 1). Two  
46  
47  
48 194 studies were included after obtaining the relevant data by contacting the respective authors  
49  
50  
51 195 [9, 10]. In addition, we also verified 2 studies [16, 17] with overlapping study population;  
52  
53  
54 196 of these, only 1 study was included in the meta-analysis. Three studies [6, 8, 18] were

1  
2  
3  
4 197 presented as meeting abstracts without adequate data to allow the construction of a 2×2  
5  
6  
7 198 table. One article[7] was a letter to the editor and only reported the prevalence rate of  
8  
9  
10 199 ASCA antibody in patients with BD, without information about the control group. One  
11  
12 200 study [19] had employed a unique calculation method and could not be included in the  
13  
14  
15 201 meta-analysis. Among the included studies, there were 326 cases of BD, 294 cases of  
16  
17 202 GIBD, 520 cases of CD, 598 cases of UC, 112 cases of iTB, and 428 HCs (Table 1 and  
18  
19  
20 203 Table S3).  
21  
22  
23  
24 204  
25  
26

#### 27 205 Quality assessment

28  
29  
30  
31 206 There were 8 case-control studies and 1 retrospective study [9]. The results of quality  
32  
33  
34 207 assessment by NOS including the selection of the study groups, the comparability of the  
35  
36 208 groups and the ascertainment of the exposure of interest for case-control studies are shown  
37  
38  
39 209 in Table 2, and by QUADAS-2 including the risk of bias and applicability concerns  
40  
41  
42 210 pertaining to each domain are shown in Figure S1. The results indicated that the included  
43  
44  
45 211 studies were of high quality in general. Overall, none of the 9 included studies showed any  
46  
47 212 major methodological bias or flaws, which indicates robustness of our meta-analysis.  
48  
49  
50  
51 213

#### 54 214 Meta-analysis

1  
2  
3  
4 215 Association between ASCA and BD (without gastrointestinal involvement), GIBD and  
5  
6  
7 216 other intestinal diseases  
8  
9  
10 217 Data pertaining to correlation between ASCA and BD (without gastrointestinal  
11  
12  
13 218 involvement)/GIBD/CD/UC/iTB are listed in Table 3. No substantial heterogeneity  
14  
15  
16 219 ( $p>0.1$  for all) was observed by using REM to calculate the OR. The results revealed a  
17  
18  
19 220 strong association between all detection types of ASCA and GIBD, especially for ASCA-  
20  
21 221 IgG [OR=5.50 (95% CI 2.58–11.55,  $p=0.000$ ) and ASCA-IgG+IgA [OR=5.36 (95% CI  
22  
23  
24 222 1.40–20.45),  $p=0.014$ ]. When comparing GIBD and UC, of the positivity rate for ASCA  
25  
26  
27 223 in GIBD was significantly higher than that for UC: IgA [OR=2.13 (95% CI 1.30–3.50),  
28  
29 224  $p=0.003$ ], IgG+IgA [OR=2.19 (95% CI 1.03–4.66),  $p=0.042$ ], and IgG/IgA [OR=2.03  
30  
31  
32 225 (95% CI 1.30–3.17),  $p=0.002$ ]. Conversely, the frequency of only ASCA-IgG in patients  
33  
34  
35 226 with CD was significantly higher than that in the GIBD [OR=5.36 (95% CI 1.40–20.45),  
36  
37  
38 227  $p=0.009$ ]. Further, on stratified analysis according to detection method, ASCA-IgG was  
39  
40 228 associated with GIBD using both the ELISA method (OR = 3.83, 95% CI 1.37–10.70,  $p$   
41  
42  
43 229 = 0.010) and the immunoprecipitation method (IIF) (OR = 8.17, 95% CI 2.73–24.43,  $p$  =  
44  
45  
46 230 0.000) (Figure 2). However, no significant difference was observed with respect to  
47  
48  
49 231 ASCA positivity between BD without gastrointestinal involvement and HC and between  
50  
51 232 GIBD and iTB ( $p>0.05$ ).  
52  
53  
54  
55 233 Diagnostic ability of ASCA for GIBD  
56  
57  
58  
59  
60

1  
2  
3  
4 234 The overall sensitivity for ASCA-IgG in patients with GIBD detected by IIF was 0.44,  
5  
6  
7 235 which is much higher than that of ELISA [0.20 (95%CI 0.12–0.31)] (Table 4). Combined  
8  
9  
10 236 detection of IgG and IgA by ELISA increased the sensitivity to 0.33 (95% CI 0.23–0.44).  
11  
12 237 However, we observed a low level of sensitivity of ASCA-IgG/IgA by IIF, which may be  
13  
14  
15 238 attributable to the inclusion of only one study with few GIBD patients (n=13).

### 18 239 Difference in serum levels of ASCA in GIBD and other intestinal diseases

20  
21  
22 240 Serum levels of ASCA-IgA observed in GIBD were significantly greater than that in HC  
23  
24 241 [WMD=7.02 (95% CI 2.23–11.81), p=0.004] and UC [WMD=5.28 (95% CI 0.39–10.17),  
25  
26  
27 242 p=0.034] in contrast to ASCA-IgG (p>0.05) (Figure 3). On the contrary, serum levels of  
28  
29  
30 243 ASCA-IgG in CD were significantly greater than that in GIBD [WMD=-11.04 (95% CI -  
31  
32 244 16.74--5.34), p=0.000] (Figure 3). However, we found no significant difference in serum  
33  
34  
35 245 levels of ASCA between BD without gastrointestinal symptoms and HC (p>0.05) (Figure  
36  
37  
38 246 3).

### 45 248 Heterogeneity and sensitivity analysis

47  
48  
49 249 We performed sensitivity analysis to assess the stability of the results. The results showed  
50  
51  
52 250 that the studies by Krause et al (2002), Zhang et al (2018), Kocazeybe et al (2010), and  
53  
54  
55 251 Fresko et al (2005) were the key contributors to the heterogeneity (Figure S2). Thus, the

1  
2  
3  
4 252 results of related subgroup analysis are considered to be less stable.  
5  
6  
7

8 253  
9

10  
11 254 Summary of the relationship of ASCA with autoimmune disease  
12  
13

14  
15 255 Sixteen studies reporting the relevance of ASCA and autoimmune diseases were included  
16  
17 256 in the summary. The sensitivity, specificity, LR+, and LR- of ASCA for different  
18  
19  
20 257 autoimmune diseases are summarized in Table 5. Although the diagnostic results of ASCA  
21  
22  
23 258 reported by different studies vary, the summary revealed an overall association between  
24  
25  
26 259 ASCA and autoimmune diseases especially in patients with scleroderma, juvenile  
27  
28 260 idiopathic arthritis, Crohn's disease, and systemic lupus erythematosus with high SEN  
29  
30  
31 261 (>40%), high SPE (>95), high LR+ (>5) (Table 5).  
32  
33  
34  
35 262  
36  
37

38 263 **Discussion**  
39  
40

41 264 **Serological markers in BD.** The diagnosis of BD is typically challenging prior to the  
42  
43  
44 265 appearance of clinical symptoms necessary to qualify the diagnostic criteria. Currently,  
45  
46  
47 266 there are no specific laboratory biomarkers of BD; however, some specific autoantibodies  
48  
49  
50 267 in the context of BD have been reported. Therefore, identification of non-invasive specific  
51  
52  
53 268 diagnostic and prognostic biomarkers of BD is of much clinical relevance and a key focus  
54  
55  
56 269 area of research.  
57  
58  
59  
60

1  
2  
3  
4 270 **ASCA in BD and autoimmune diseases.** Several recent studies have investigated the  
5  
6  
7 271 relationship of ASCA with BD or other autoimmune diseases. *Saccharomyces cerevisiae*  
8  
9  
10 272 has long been utilized in alcoholic and baking industry, and for the production of vaccines  
11  
12 273 owing to its antigenic component. However, during long-term and ubiquitous presence,  
13  
14  
15 274 even the commensal and classically non-pathogenic microbiota can trigger autoimmunity  
16  
17 275 due to loss of immune tolerance towards the resident bacterial flora, like in gastrointestinal  
18  
19  
20 276 tract [20, 21]. The reported similarity of sequences involving the eukaryotic microorganism  
21  
22  
23 277 and self-antigens suggest a mechanism of molecular mimicry and also the plausibility of  
24  
25  
26 278 shared epitopes in different autoimmune diseases. The production of ASCA by the  
27  
28 279 subsequent activation of the humoral immune response may lead to a direct pathogenic role  
29  
30  
31 280 through a costimulatory CD80/86-CD28-mediated effect [20]. Moreover, healthy family  
32  
33  
34 281 members but not spouses of BD patients were also found to have increased levels of ASCA,  
35  
36  
37 282 which indicated a role of genetic factors in addition to environmental stimuli [17, 21]. A  
38  
39  
40 283 large number of studies have assessed the role of ASCA in the context of several systemic  
41  
42 284 and organ-specific autoimmune diseases, such as BD, scleroderma, systemic lupus  
43  
44  
45 285 erythematosus, primary Sjögren's syndrome, and rheumatoid arthritis (Table 5). The  
46  
47  
48 286 results suggest that the relation of ASCA with BD or other autoimmune diseases may  
49  
50  
51 287 represent a potential pathogenic mechanism between ASCA and autoimmunity; this  
52  
53 288 underlines the importance of ASCA as a valuable serologic marker for autoimmune  
54  
55  
56 289 diseases including BD.



1  
2  
3  
4 290 **Results of the meta-analysis.** To the best of our knowledge, this is the second meta-  
5  
6  
7 291 analysis of evidence pertaining to autoantibodies in patients with BD after anticardiolipin  
8  
9  
10 292 antibodies [22]. ASCA have been widely researched in BD, Crohn's disease and other  
11  
12 293 autoimmune disease; in order to investigate the diagnostic value and possible pathogenetic  
13  
14  
15 294 role of ASCA in BD, we included 9 studies in this meta-analysis. Among these, some  
16  
17 295 studies included BD patients with systemic involvement including or excluding  
18  
19  
20 296 gastrointestinal involvement, while others included only BD patients with gastrointestinal  
21  
22  
23 297 involvement. Therefore, in order to reduce the impact of differences with respect to  
24  
25  
26 298 frequency distribution of gastrointestinal symptoms in each study, we disaggregated  
27  
28  
29 299 patients with BD into those with gastrointestinal involvement only and those without  
30  
31 300 gastrointestinal manifestations. The isotype antibodies of ASCA tested and the results  
32  
33  
34 301 presented by the studies are also different. The meta-analysis revealed a strong association  
35  
36  
37 302 of ASCA with GIBD and not with BD with no gastrointestinal involvement; this suggests  
38  
39  
40 303 the role of ASCA in the pathogenesis of gastrointestinal involvement. ASCA showed a  
41  
42 304 moderate diagnostic performance as a biomarker for the differential diagnosis between  
43  
44  
45 305 GIBD and CD, and the negative result of ASCA-IgG may slightly favor the diagnosis of  
46  
47  
48 306 GIBD/BD when compared with CD, especially with concomitant positive HLA-B51 tests  
49  
50 307 [23]. In addition, ASCA-IgA showed a moderate diagnostic value for distinguishing GIBD  
51  
52  
53 308 and UC and would perform better with concomitant detection of IgG. However, ASCA  
54  
55  
56 309 failed to distinguish between GIBD and iTB. Besides, the concomitant evaluation of both

1  
2  
3  
4 310 continuous data (sensitivity and specificity) and discontinuous data (serum levels) helped  
5  
6  
7 311 increase the credibility of our results.  
8  
9

10 312 **Heterogeneity.** Combined with the results of QUADAS-2, we found that the heterogeneity  
11  
12 313 in this meta-analysis was largely attributable to the following reasons (see Table 1, Figure  
13  
14  
15 314 S1). 1) The different diagnostic criteria used in the included studies. Different criteria may  
16  
17  
18 315 have different thresholds for diagnosis or place more weight on some symptoms than  
19  
20  
21 316 others. Specifically, the 1990 ISG criteria requires the presence of oral ulceration plus any  
22  
23  
24 317 two of the following: genital ulceration, typical eye lesions, typical skin lesions, or positive  
25  
26  
27 318 pathergy test for diagnosis of BD [2]. In contrast, the 1987 Japan criteria require all four  
28  
29  
30 319 characteristics for the diagnosis of BD, i.e., oral ulceration, typical eye lesions, typical skin  
31  
32  
33 320 lesions, and genital ulceration [24]. The ISG criteria and the Japanese criteria often fail to  
34  
35  
36 321 classify some patients with BD; in addition, the Japanese criteria may also cause  
37  
38  
39 322 misclassified diagnosis. This may have caused the different diagnostic sensitivity and  
40  
41  
42 323 specificity for BD [25]. 2) Differences in demographic characteristics of included studies.  
43  
44  
45 324 The clinical features and laboratory findings tend to exhibit wide variability in different  
46  
47  
48 325 populations and clinical settings [26, 27]. However, we failed to perform subgroup analysis  
49  
50  
51 326 disaggregated by ethnicity owing to the small sample size in each subgroup. 3) Different  
52  
53  
54 327 antibody assays and cut-off values. Commercial kits and in-house tests from different  
55  
56  
57 328 laboratories have variable performance, which may affect the diagnosis and management

1  
2  
3  
4 329 of patients. We found that different methods and cut-off values were adopted by the studies  
5  
6  
7 330 included in this meta-analysis. Notably, there was significant association between ASCA-  
8  
9  
10 331 IgG and GIBD using both methods; however, it seems that IIF has a higher sensitivity than  
11  
12 332 ELISA. Nonetheless, further investigations with larger study population are required to  
13  
14  
15 333 provide more definitive evidence. Although previous studies have shown that IIF has a  
16  
17 334 better performance, ELISA provides the titer change of serum antibodies and could have  
18  
19  
20 335 an equal performance to IIF by changing cut-off values to optimize the overall diagnostic  
21  
22  
23 336 performance [28].  
24  
25

26 337 **Limitations of the meta-analysis.** In order to fully evaluate the value of ASCA for  
27  
28 338 differential diagnosis of BD, we included patients with CD, UC, and iTB as the comparison  
29  
30  
31 339 objects in our meta-analysis. However, there are still some limitations of this meta-analysis.  
32  
33  
34 340 (1) Gray literature database, paper database, and other language databases were not used  
35  
36  
37 341 for the literature search. Quite a few non-English studies were excluded due to incomplete  
38  
39  
40 342 data or unavailability of full text. (2) Our primary goal was to assess the diagnostic efficacy  
41  
42  
43 343 of ASCA in BD, and therefore we did not include all studies pertaining to ASCA in  
44  
45  
46 344 inflammatory bowel disease and iTB. (3) Restricted by the number of included studies and  
47  
48  
49 345 the isotypes of ASCA, we could not perform subgroup analysis disaggregated by different  
50  
51  
52 346 populations and diagnostic criteria. (4) Some studies with incomplete data were excluded  
53  
54  
55 347 after lack of response from the author. (5) There are some inherent statistical shortcomings  
56  
57  
58  
59  
60

1  
2  
3  
4 348 using Meta-DiSc during the separate pooling of sensitivity and specificity, as the between-  
5  
6  
7 349 study variance is not included. More advanced methods are not implemented [29].  
8  
9

10 350 **Conclusion.** Our meta-analysis results, together with the review of ASCA in autoimmune  
11  
12  
13 351 diseases strongly suggest that ASCA (especially its certain isotypes) may be helpful  
14  
15  
16 352 biomarkers for GIBD, especially with respect to their possible  
17  
18  
19 353 predictive/pathogenic/diagnostic role in clinical settings [20]. Furthermore, ASCA may be  
20  
21  
22 354 detectable years before the diagnosis of some autoimmune diseases as they were  
23  
24  
25 355 retrospectively found in the preserved blood samples of soldiers who were affected by  
26  
27  
28 356 Crohn's disease years later [30]. However, due to its presence in several other autoimmune  
29  
30  
31 357 diseases, ASCA may have a limited value for clinical diagnosis.  
32

33  
34  
35  
36  
37  
38  
39  
40  
41  
42  
43  
44  
45  
46  
47  
48  
49  
50  
51  
52  
53  
54  
55  
56  
57  
58  
59  
60 358

359 **Compliance with Ethical Standards:**

360 **Contributorship statement:** Study concept and design: Linlin Cheng, Yongzhe Li.  
361 Acquisition of data: Linlin Cheng, Liubing Li, Chenxi Liu, Songxin Yan. Statistical  
362 analysis and interpretation of data: Linlin Cheng, Liubing Li, Chenxi Liu. Drafting of the  
363 manuscript: Linlin Cheng. Revision of manuscript: Yongzhe Li, Linlin Cheng, Liubing Li.  
364 Supervision of work: Yongzhe Li. All authors read and approved the final manuscript.

365 **competing interests:** None.

366 **Funding:** This research was supported by grants from the National Natural Science  
367 Foundation of China Grants (81671618, 81871302), the CAMS Initiative for Innovative  
368 Medicine (2017-I2M-3-001, 2017-I2M-B&R-01)

369 **Ethical approval:** This article does not contain any studies with human participants  
370 performed by any of the authors.

371 **Data availability statement:** All data relevant to the study are included in the article or  
372 uploaded as supplementary information.

373

374 **References**

- 375 1. Yazici H., Seyahi E., Hatemi G., Yazici Y. Behcet syndrome: a contemporary view.  
376 Nat Rev Rheumatol. 2018;14:107-19.
- 377 2. Criteria for diagnosis of Behcet's disease. International Study Group for Behcet's  
378 Disease. Lancet. 1990;335:1078-80.
- 379 3. Davatchi F., Assaad-Khalil S., Calamia K.T., Crook J.E., Sadeghi-Abdollahi B.,  
380 Schirmer M., Tzellos T., Zouboulis C.C., Akhlagi M., Al-Dalaan A., Alekberova Z.S.,  
381 Ali A.A., Altenburg A., Arromdee E., Baltaci M., Bastos M., Benamour S., Ben  
382 Ghorbel I., Boyvat A., Carvalho L., Chen W., Ben-Chetrit E., Chams-Davatchi C.,  
383 Correia J. A., Crespo J., Dias C., Dong Y., Paixão-Duarte F., Elmuntaser K., Elonakov  
384 A.V., Graña Gil J., Haghdoost A.-A., Hayani R.M., Houman H., Isayeva A.R.,  
385 Jamshidi A.R., Kaklamanis P., Kumar A., Kyrgidis A., Madanat W., Nadji A., Namba  
386 K., Ohno S., Olivieri I., Vaz Patto J., Pipitone N., De Queiroz M.V., Ramos F.,  
387 Resende C., Rosa C.M., Salvarani C., Serra M.J., Shahram F., Shams H., Sharquie  
388 K.E., Sliti-Khanfir M., Tribolet De Abreu T., Vasconcelos C., Vedes J., Wechsler B.,  
389 Cheng Y.K., Zhang Z., Ziaei N. The International Criteria for Behçet's Disease

- 1  
2  
3 390 (ICBD): a collaborative study of 27 countries on the sensitivity and specificity of the  
4 391 new criteria. *Journal of the European Academy of Dermatology and Venereology*.  
5 392 2014;28:338-47.
- 6  
7 393 4. Alpsy E., Donmez L., Bacanli A., Apaydin C., Butun B. Review of the chronology of  
8 394 clinical manifestations in 60 patients with Behcet's disease. *Dermatology*.  
9 395 2003;207:354-6.
- 10  
11 396 5. Sicard D., Legras J. L. Bread, beer and wine: yeast domestication in the  
12 397 *Saccharomyces sensu stricto* complex. *C R Biol*. 2011;334:229-36.
- 13  
14 398 6. Aslan M., Kocazeybek B., Celik A., Erzin Y., Hatemi I., Hatemi G., Yazici H. Anti-  
15 399 *Saccharomyces cerevisiae* (ASCA) antibody levels in a subgroup of patients with  
16 400 ulcerative colitis, Crohn's disease, GI Behcet, and GI tuberculosis: Correlations with  
17 401 disease duration, activity, and extension. *International Journal of Infectious Diseases*.  
18 402 2010;14:e117-e8.
- 19  
20  
21 403 7. Filik Levent, Biyikoglu Ibrahim. Differentiation of Behcet's disease from  
22 404 inflammatory bowel diseases: Anti-saccharomyces cerevisiae antibody and anti-  
23 405 neutrophilic cytoplasmic antibody. *World Journal of Gastroenterology*. 2008;14:7271.
- 24  
25 406 8. Kocazeybek B., Aslan M., Erzin Y., Celik A., Hatemi I., Hatemi G., Yazici H. Clinical  
26 407 utility of perinuclear antineutrophil cytoplasmic antibodies and anti-*Saccharomyces*  
27 408 *Cerevisiae* antibodies for discriminating specific intestinal inflammations. *International*  
28 409 *Journal of Infectious Diseases*. 2010;14:e118.
- 29  
30 410 9. Zhang Shulan, Luo Jing, Li Ji, Wu Ziyang, Hu Chaojun, Li Ping, Deng Chuiwen, Zhang  
31 411 Fengchun, Qian Jiaming, Li Yongzhe. Retrospective evaluation of the clinical utility of  
32 412 serological biomarkers in Chinese patients with inflammatory bowel disease: 2-year  
33 413 clinical experience. *Clinical Chemistry and Laboratory Medicine (CCLM)*.  
34 414 2017;55:865-75.
- 35  
36 415 10. Zhang Shulan, Luo Jing, Wu Ziyang, Roggenbuck Dirk, Schierack Peter, Reinhold  
37 416 Dirk, Li Ji, Zeng Xiaofeng, Zhang Fengchun, Qian Jiaming, Li Yongzhe. Antibodies  
38 417 against glycoprotein 2 display diagnostic advantages over ASCA in distinguishing CD  
39 418 from intestinal tuberculosis and intestinal Behcet's disease. *Clinical and Translational*  
40 419 *Gastroenterology*. 2018;9:e133.
- 41  
42 420 11. Lidar M., Langevitz P., Barzilai O., Ram M., Porat-Katz B. S., Bizzaro N., Tonutti E.,  
43 421 Maieron R., Chowers Y., Bar-Meir S., Shoenfeld Y. Infectious serologies and  
44 422 autoantibodies in inflammatory bowel disease: insinuations at a true pathogenic role.  
45 423 *Ann N Y Acad Sci*. 2009;1173:640-8.
- 46  
47 424 12. McInnes M. D. F., Moher D., Thombs B. D., McGrath T. A., Bossuyt P. M., Clifford  
48 425 T., Cohen J. F., Deeks J. J., Gatsonis C., Hooft L., Hunt H. A., Hyde C. J., Korevaar D.  
49 426 A., Leeflang M. M. G., Macaskill P., Reitsma J. B., Rodin R., Rutjes A. W. S.,  
50 427 Salameh J. P., Stevens A., Takwoingi Y., Tonelli M., Weeks L., Whiting P., Willis B.  
51 428 H. Preferred Reporting Items for a Systematic Review and Meta-analysis of Diagnostic

- 1  
2  
3  
4 429 Test Accuracy Studies: The PRISMA-DTA Statement. *Jama*. 2018;319:388-96.
- 5 430 13. Stroup D. F., Berlin J. A., Morton S. C., Olkin I., Williamson G. D., Rennie D.,  
6 431 Moher D., Becker B. J., Sipe T. A., Thacker S. B. Meta-analysis of observational  
7 432 studies in epidemiology: a proposal for reporting. *Meta-analysis Of Observational  
8 433 Studies in Epidemiology (MOOSE) group*. *Jama*. 2000;283:2008-12.
- 9  
10 434 14. Liberati A., Altman D. G., Tetzlaff J., Mulrow C., Gotzsche P. C., Ioannidis J. P.,  
11 435 Clarke M., Devereaux P. J., Kleijnen J., Moher D. The PRISMA statement for  
12 436 reporting systematic reviews and meta-analyses of studies that evaluate healthcare  
13 437 interventions: explanation and elaboration. *Bmj*. 2009;339:b2700.
- 14  
15 438 15. Cheung M. W., Ho R. C., Lim Y., Mak A. Conducting a meta-analysis: basics and  
16 439 good practices. *Int J Rheum Dis*. 2012;15:129-35.
- 17  
18 440 16. Krause I., Monselise Y., Milo G., Weinberger A. Anti-Saccharomyces cerevisiae  
19 441 antibodies--a novel serologic marker for Behcet's disease. *Clin Exp Rheumatol*.  
20 442 2002;20:S21-4.
- 21  
22 443 17. Monselise A., Weinberger A., Monselise Y., Fraser A., Sulkes J., Krause I. Anti-  
23 444 Saccharomyces cerevisiae antibodies in Behcet's disease--a familial study. *Clin Exp  
24 445 Rheumatol*. 2006;24:S87-90.
- 25  
26 446 18. Prado L.L., Augusto K.L., Magalhães P.F., Viana V.T., Saad C.G.S., Gonçalves C.R.  
27 447 THU0219 Anti-saccharomyces cerevisiae antibodies (ASCA) in active behçet's  
28 448 disease: A marker of intestinal involvement? *Annals of the Rheumatic Diseases*.  
29 449 2013;71:229-.
- 30  
31 450 19. Oshitani N., Hato F., Jinno Y., Sawa Y., Nakamura S., Matsumoto T., Seki S.,  
32 451 Kitagawa S., Arakawa T. IgG subclasses of anti Saccharomyces cerevisiae antibody in  
33 452 inflammatory bowel disease. *Eur J Clin Invest*. 2001;31:221-5.
- 34  
35 453 20. Rinaldi M., Perricone R., Blank M., Perricone C., Shoenfeld Y. Anti-Saccharomyces  
36 454 cerevisiae autoantibodies in autoimmune diseases: from bread baking to autoimmunity.  
37 455 *Clin Rev Allergy Immunol*. 2013;45:152-61.
- 38  
39 456 21. Seibold F. ASCA: genetic marker, predictor of disease, or marker of a response to an  
40 457 environmental antigen? *Gut*. 2005;54:1212-3.
- 41  
42 458 22. Zouboulis C. C., Buttner P., Tebbe B., Orfanos C. E. Anticardiolipin antibodies in  
43 459 Adamantiades-Behcet's disease. *Br J Dermatol*. 1993;128:281-4.
- 44  
45 460 23. El-Lateef H. M. A. Behcet disease in pediatrics; a solitary sign can be enough.  
46 461 *Pediatric Rheumatology*. 2019;17.
- 47  
48 462 24. Mizushima Y., Inaba G., Mimura Y., Ono S. Diagnostic criteria for Behçet's disease  
49 463 in 1987, and guideline for treating Behçet's disease1988. 391-3 p.
- 50  
51 464 25. Chang H. K., Lee S. S., Bai H. J., Lee Y. W., Yoon B. Y., Lee C. H., Lee Y. H., Song  
52 465 G. G., Chung W. T., Lee S. W., Choe J. Y., Kim C. G., Chang D. K. Validation of the  
53 466 classification criteria commonly used in Korea and a modified set of preliminary  
54 467 criteria for Behcet's disease: a multi-center study. *Clin Exp Rheumatol*. 2004;22:S21-6.



- 1  
2  
3  
4 468 26. Kramer M., Hasanreisoglu M., Weiss S., Kumova D., Schaap-Fogler M., Guntekin-  
5 469 Ergun S., Ozdek S., Gurelik G., Ergun M. A., Goldenberg-Cohen N., Cohen Y. Single-  
6 470 Nucleotide Polymorphisms in IL23R-IL12RB2 (rs1495965) Are Highly Prevalent in  
7 471 Patients with Behcet's Uveitis, and Vary between Populations. *Ocul Immunol Inflamm.*  
8 472 2018;1-8.
- 9  
10 473 27. Fedrigo A., Skare T. L., Bortoluzzi A. L., Nisihara R. ASCA (Anti- *Saccharomyces*  
11 474 *cerevisiae* Antibody) in Patients with Scleroderma. *Journal of Clinical Rheumatology.*  
12 475 2019;25:24-7.
- 13  
14 476 28. Holle J. U., Hellmich B., Backes M., Gross W. L., Csernok E. Variations in  
15 477 performance characteristics of commercial enzyme immunoassay kits for detection of  
16 478 antineutrophil cytoplasmic antibodies: what is the optimal cut off? *Ann Rheum Dis.*  
17 479 2005;64:1773-9.
- 18  
19 480 29. Wang Junfeng, LeeFlang Mariska. Recommended software/packages for meta-  
20 481 analysis of diagnostic accuracy. *Journal of Laboratory and Precision Medicine.* 2019;4.
- 21  
22 482 30. Israeli E., Grotto I., Gilburd B., Balicer R. D., Goldin E., Wiik A., Shoenfeld Y. Anti-  
23 483 *Saccharomyces cerevisiae* and antineutrophil cytoplasmic antibodies as predictors of  
24 484 inflammatory bowel disease. *Gut.* 2005;54:1232-6.
- 25  
26 485 31. Zhang Shulan, Luo Jing, Wu Ziyang, Roggenbuck Dirk, Schierack Peter, Reinhold  
27 486 Dirk, Li Ji, Zeng Xiaofeng, Zhang Fengchun, Qian Jiaming, Li Yongzhe. Antibodies  
28 487 against glycoprotein 2 display diagnostic advantages over ASCA in distinguishing CD  
29 488 from intestinal tuberculosis and intestinal Behçet's disease. *Clin Transl Gastroenterol.*  
30 489 2018;9:e133.
- 31  
32 490 32. Zhang Shulan, Luo Jing, Li Ji, Wu Ziyang, Hu Chaojun, Li Ping, Deng Chuiwen,  
33 491 Zhang Fengchun, Qian Jiaming, Li Yongzhe. Retrospective evaluation of the clinical  
34 492 utility of serological biomarkers in Chinese patients with inflammatory bowel disease:  
35 493 2-year clinical experience. *Clin Chem Lab Med.* 2017;55:865-75.
- 36  
37 494 33. Vaiopoulos G., Lakatos P. L., Papp M., Kaklamanis F., Economou E., Zevgolis V.,  
38 495 Sourdis J., Konstantopoulos K. Serum anti-*Saccharomyces cerevisiae* antibodies in  
39 496 Greek patients with Behcet's disease. *Yonsei Med J.* 2011;52:347-50.
- 40  
41 497 34. Kocazeybek B., Aslan M., Erzin Y., Celik A., Hatemi I., Hatemi G., Yazici H.  
42 498 Clinical utility of perinuclear antineutrophil cytoplasmic antibodies and anti-  
43 499 *Saccharomyces Cerevisiae* antibodies for discriminating specific intestinal  
44 500 inflammations. *Int J Infect Dis.* 2010;14:e118.
- 45  
46 501 35. Choi C. H., Kim T. I., Kim B. C., Shin S. J., Lee S. K., Kim W. H., Kim H. S. Anti-  
47 502 *Saccharomyces cerevisiae* antibody in intestinal Behcet's disease patients: relation to  
48 503 clinical course. *Dis Colon Rectum.* 2006;49:1849-59.
- 49  
50 504 36. Fresko I., Ugurlu S., Ozbakir F., Celik A., Yurdakul S., Hamuryudan V., Yazici H.  
51 505 Anti-*Saccharomyces cerevisiae* antibodies (ASCA) in Behcet's syndrome. *Clin Exp*  
52 506 *Rheumatol.* 2005;23:S67-70.



- 1  
2  
3  
4 507 37. Rhee S. H., Kim Y. B., Lee E. S. Comparison of Behcet's disease and recurrent  
5 508 aphthous ulcer according to characteristics of gastrointestinal symptoms. *J Korean*  
6 509 *Med Sci.* 2005;20:971-6.
- 7  
8 510 38. Kim B. G., Kim Y. S., Kim J. S., Jung H. C., Song I. S. Diagnostic role of anti-  
9 511 *Saccharomyces cerevisiae* mannan antibodies combined with antineutrophil  
10 512 cytoplasmic antibodies in patients with inflammatory bowel disease. *Dis Colon*  
11 513 *Rectum.* 2002;45:1062-9.
- 12  
13 514 39. De Vries M., Van Der Horst-Bruinsma I., Van Hoogstraten I., Van Bodegraven A.,  
14 515 Von Blomberg B. M., Ratnawati H., Dijkmans B. pANCA, ASCA, and OmpC  
15 516 antibodies in patients with ankylosing spondylitis without inflammatory bowel disease.  
16 517 *J Rheumatol.* 2010;37:2340-4.
- 17  
18 518 40. Riente L., Chimenti D., Pratesi F., Delle Sedie A., Tommasi S., Tommasi C.,  
19 519 Bombardieri S., Migliorini P. Antibodies to tissue transglutaminase and  
20 520 *Saccharomyces cerevisiae* in ankylosing spondylitis and psoriatic arthritis. *J*  
21 521 *Rheumatol.* 2004;31:920-4.
- 22  
23 522 41. Mundwiler M. L., Mei L., Landers C. J., Reveille J. D., Targan S., Weisman M. H.  
24 523 Inflammatory bowel disease serologies in ankylosing spondylitis patients: a pilot  
25 524 study. *Arthritis Res Ther.* 2009;11:R177.
- 26  
27 525 42. Wallis Dinny, Asaduzzaman Arundip, Weisman Michael, Haroon Nigil, Anton  
28 526 Ammepa, MCGovern Dermot, Targan Stephan, Inman Robert. Elevated serum anti-  
29 527 flagellin antibodies implicate subclinical bowel inflammation in ankylosing  
30 528 spondylitis: an observational study. *Arthritis Research & Therapy.* 2013;15:R166.
- 31  
32 529 43. Krause I., Blank M., Cervera R., Font J., Matthias T., Pfeiffer S., Wies I., Fraser A.,  
33 530 Shoenfeld Y. Cross-reactive epitopes on beta2-glycoprotein-I and *Saccharomyces*  
34 531 *cerevisiae* in patients with the antiphospholipid syndrome. *Ann N Y Acad Sci.*  
35 532 2007;1108:481-8.
- 36  
37 533 44. Gonzalez T., Malagon C., Guarnizo P., Mosquera A. C., Chila-Moreno L., Romero-  
38 534 Sanchez C. Autoantibodies and Gastrointestinal Symptoms in Colombian Children  
39 535 with Juvenile Idiopathic Arthritis. *Curr Rheumatol Rev.* 2018;14:163-71.
- 40  
41 536 45. Muratori P., Muratori L., Guidi M., Maccariello S., Pappas G., Ferrari R., Gionchetti  
42 537 P., Campieri M., Bianchi F. B. Anti-*Saccharomyces cerevisiae* antibodies (ASCA) and  
43 538 autoimmune liver diseases. *Clin Exp Immunol.* 2003;132:473-6.
- 44  
45 539 46. Czaja A. J., Shums Z., Donaldson P. T., Norman G. L. Frequency and significance of  
46 540 antibodies to *Saccharomyces cerevisiae* in autoimmune hepatitis. *Dig Dis Sci.*  
47 541 2004;49:611-8.
- 48  
49 542 47. Papp M., Norman G. L., Vitalis Z., Tornai I., Altorjay I., Foldi I., Udvardy M., Shums  
50 543 Z., Dinya T., Orosz P., Lombay B., Jr., Par G., Par A., Veres G., Csak T., Osztoivits J.,  
51 544 Szalay F., Lakatos P. L. Presence of anti-microbial antibodies in liver cirrhosis--a tell-  
52 545 tale sign of compromised immunity? *PLoS One.* 2010;5:e12957.

- 1  
2  
3 546 48. Sakly W., Jeddi M., Ghedira I. Anti-Saccharomyces cerevisiae antibodies in primary  
4 547 biliary cirrhosis. *Dig Dis Sci.* 2008;53:1983-7.  
5  
6 548 49. Main J., Mckenzie H., Yeaman G. R., Kerr M. A., Robson D., Pennington C. R.,  
7 549 Parratt D. Antibody to Saccharomyces cerevisiae (bakers' yeast) in Crohn's disease.  
8 550 *Bmj.* 1988;297:1105-6.  
9  
10 551 50. Shor D. B., Orbach H., Boaz M., Altman A., Anaya J. M., Bizzaro N., Tincani A.,  
11 552 Cervera R., Espinosa G., Stojanovich L., Rozman B., Bombardieri S., Vita S. D.,  
12 553 Damoiseaux J., Villalta D., Tonutti E., Tozzoli R., Barzilai O., Ram M., Blank M.,  
13 554 Agmon-Levin N., Shoenfeld Y. Gastrointestinal-associated autoantibodies in different  
14 555 autoimmune diseases. *Am J Clin Exp Immunol.* 2012;1:49-55.  
15  
16 556 51. Yazici D., Aydin S. Z., Yavuz D., Tarcin O., Deyneli O., Direskeneli H., Akalin S.  
17 557 Anti-Saccaromyces Cerevisiae antibodies (ASCA) are elevated in autoimmune thyroid  
18 558 disease ASCA in autoimmune thyroid disease. *Endocrine.* 2010;38:194-8.  
19  
20 559 52. Mankai A., Thabet Y., Manoubi W., Achour A., Sakly W., Ghedira I. Anti-  
21 560 Saccharomyces cerevisiae antibodies are elevated in Graves' disease but not in  
22 561 Hashimoto's thyroiditis. *Endocr Res.* 2013;38:98-104.  
23  
24 562 53. Dai H., Li Z., Zhang Y., Lv P., Gao X. M. Elevated levels of serum IgA against  
25 563 Saccharomyces cerevisiae mannan in patients with rheumatoid arthritis. *Cell Mol*  
26 564 *Immunol.* 2009;6:361-6.  
27  
28 565 54. Dai H., Li Z., Zhang Y., Lv P., Gao X. M. Elevated levels of serum antibodies against  
29 566 Saccharomyces cerevisiae mannan in patients with systemic lupus erythematosus.  
30 567 *Lupus.* 2009;18:1087-90.  
31  
32 568 55. Mankai A., Sakly W., Thabet Y., Achour A., Manoubi W., Ghedira I. Anti-  
33 569 Saccharomyces cerevisiae antibodies in patients with systemic lupus erythematosus.  
34 570 *Rheumatol Int.* 2013;33:665-9.  
35  
36 571 56. Sakly W., Mankai A., Sakly N., Thabet Y., Achour A., Ghedira-Besbes L., Jeddi M.,  
37 572 Ghedira I. Anti-Saccharomyces cerevisiae antibodies are frequent in type 1 diabetes.  
38 573 *Endocr Pathol.* 2010;21:108-14.  
39  
40 574 57. Alunno A., Bistoni O., Carubbi F., Valentini V., Cafaro G., Bartoloni E., Giacomelli  
41 575 R., Gerli R. Prevalence and significance of anti-saccharomyces cerevisiae antibodies in  
42 576 primary Sjogren's syndrome. *Clin Exp Rheumatol.* 2018;36 Suppl 112:73-9.

577

1  
2  
3  
4 579 Figure 1 PRISMA flow diagram illustrating the literature screening process and the  
5 580 criteria for inclusion of studies in the meta-analysis  
6  
7

8 581  
9

10 582 Figure 2 Forest plot of the association between the presence of ASCA-IgG and GIBD  
11  
12  
13 583 stratified by detection methods  
14  
15

16 584  
17  
18  
19

20 585 Figure 3 Forest plot comparing serum levels of ASCA between BD without  
21  
22  
23 586 gastrointestinal symptom/GIBD and HC/CD/UC  
24  
25

26 587  
27  
28  
29

30 588  
31  
32  
33

34 589  
35  
36  
37

38 590  
39  
40  
41

42 591  
43  
44  
45

46 592  
47  
48  
49

50 593  
51  
52  
53

54 594  
55  
56  
57

58 595  
59  
60

596 Table 1 Characteristics of studies included in the meta-analysis of Anti-*Saccharomyces*

597 *cerevisiae* antibodies in Behçet's disease, its main differential diagnoses, and healthy

598 controls.

599 /:no sample; ELISA: enzyme-linked immunosorbent assay; IIF: indirect immunofluorescence assay; NR: not reported;

600 SD: standard deviation; \*: all without gastrointestinal manifestations; #: lack of corresponding data; 1990 ISG criteria:

601 the 1990 criteria of Behçet's Disease International Study Group; 1987 Japan criteria: the 1987 criteria by the Behçet's

602 Disease Research Committee of Japan; BD: Behçet's disease; GIBD: gastrointestinal Behçet's disease; CD: Crohn's

603 disease; UC: ulcerative colitis; iTB: intestinal tuberculosis; HC: healthy control

| Year and author             | Count<br>ries | Type                       | Type of article     | Design                 | Sample size |      |     |     |     |     | Methods | Brands of experimental<br>materials        | Cut-off<br>(U/ml)         | Diagnostic<br>criteria |
|-----------------------------|---------------|----------------------------|---------------------|------------------------|-------------|------|-----|-----|-----|-----|---------|--------------------------------------------|---------------------------|------------------------|
|                             |               |                            |                     |                        | BD          | GIBD | CD  | UC  | iTB | HC  |         |                                            |                           |                        |
| 2018 Shulan Zhang [31]      | China         | IgG; IgA; IgG/IgA; IgG+IgA | Original article    | case-control           | /           | 71   | 171 | 208 | 57  | 70  | ELISA   | Inova Diagnostic                           | 25                        | NR                     |
| 2017 Shulan Zhang [32]      | China         | IgG; IgA; IgG/IgA; IgG+IgA | Original article    | Retrospective<br>study | /           | 34   | 128 | 140 | 31  | /   | ELISA   | Euroimmun, Luebeck                         | 20                        | NR                     |
| 2011 George Vaiopoulos [33] | Greece        | IgG; IgA                   | Original article    | case-control           | 58          | 4*   | /   | /   | /   | 56  | ELISA   | Inova Diagnostic                           | NR                        | 1990 ISG criteria      |
| 2010 B. Kocazeybek. [34]    | Turkey        | IgG/IgA                    | conference Abstract | case-control           | /           | 13   | 63  | 102 | 10  | 165 | IIF     | Euroimmun, Luebeck                         | NR                        | NR                     |
| 2006 Chang Hwan Choi [35]   | Korea         | IgG                        | Original article    | case-control           | 30*         | 106  | /   | /   | /   | 45  | IIF     | Euroimmun, Luebeck                         | 1:1000                    | 1987 Japan criteria    |
| 2005 I. Fresko [36]         | Turkey        | IgG; IgA; IgG/IgA; IgG+IgA | Original article    | case-control           | 85          | 8    | 24  | 25  | /   | 21  | ELISA   | Inova Diagnostic                           | 28 for IgG;<br>25 for IgA | 1990 ISG criteria      |
| 1995 Seung-Ho Rhee [37]     | Korea         | IgG                        | Original article    | case-control           | /           | 16   | /   | /   | /   | 4   | ELISA   | Inova Diagnostic                           | 25                        | 1987 Japan criteria    |
| 2002 I. Krause [16]         | Israel        | IgG; IgA; IgG/IgA; IgG+IgA | Original article    | case-control           | 27*         | /    | /   | /   | /   | 10  | ELISA   | Inova Diagnostic                           | 25                        | 1990 ISG criteria      |
| 2012 Byeong Gwan Kim [38]   | Korea         | IgG+IgA+IgM                | Original article    | case-control           | /           | 36   | 85  | 77  | 14  | 20  | ELISA   | plate: Sigma Chemical<br>antibody: Biosoft | ROC curve                 | 1987 Japan criteria    |

604

605

606

607

608

609 Table 2 Risk of bias assessment of the included studies according to the modified  
610 Newcastle-Ottawa Scale (NOS).

| NOS item / Study ID                                        | 2018<br>Shulan<br>Zhang | 2017<br>Shulan<br>Zhang | 2011<br>George<br>Vaiopoulos | 2010 B.<br>Kocazeybek | 2006<br>Chang<br>Hwan<br>Choi | 2005 I.<br>Fresko | 2005<br>Seung-Ho<br>Rhee | 2002 I.<br>Krause | 2002<br>Byeong<br>Gwan<br>Kim |
|------------------------------------------------------------|-------------------------|-------------------------|------------------------------|-----------------------|-------------------------------|-------------------|--------------------------|-------------------|-------------------------------|
| Is the case definition adequate?                           | *                       | *                       | *                            |                       | *                             | *                 | *                        | *                 | *                             |
| Representativeness of the cases                            | *                       | *                       |                              |                       |                               | *                 |                          |                   |                               |
| Selection of controls                                      | *                       |                         | *                            | *                     | *                             | *                 | *                        | *                 | *                             |
| Definition of controls                                     | *                       | *                       | *                            | *                     | *                             | *                 | *                        | *                 | *                             |
| Study controls for the most important factor (i.e., age)   | *                       |                         | *                            |                       |                               | *                 |                          |                   | *                             |
| Study controls for the second important factor (i.e., sex) | *                       |                         | *                            |                       |                               | *                 |                          |                   | *                             |
| Was the measurement method of ASCA described?              | *                       | *                       | *                            | *                     | *                             | *                 | *                        | *                 | *                             |
| Same method of ascertainment for cases and controls        | *                       | *                       | *                            | *                     | *                             | *                 | *                        | *                 | *                             |
| Non-response rate                                          | *                       | *                       | *                            | *                     | *                             | *                 | *                        | *                 | *                             |
| Total Score                                                | 9                       | 6                       | 8                            | 5                     | 6                             | 9                 | 6                        | 6                 | 8                             |

611 \* was awarded when the respective information was available.

612

613

614

615

616

617

618 Table 3. Association between the presence of ASCA and BD (without gastrointestinal  
 619 symptom)/GIBD and other intestinal diseases

620 BD: Behçet's disease without gastrointestinal symptom; GIBD: gastrointestinal Behçet's disease; CD: Crohn's disease;  
 621 UC: ulcerative colitis; iTB: intestinal tuberculosis; HC: healthy control

| Subgroup     | Antibody     | Number of studies | Diagnostic OR (95% CI) | Significance test (p) |
|--------------|--------------|-------------------|------------------------|-----------------------|
| BD vs. HC    | ASCA-IgG     | 4                 | 1.00 (0.28–3.53)       | 0.997                 |
|              | ASCA-IgA     | 2                 | 2.50 (0.63–9.96)       | 0.194                 |
|              | ASCA-IgG+IgA | 2                 | 1.06 (0.17–6.78)       | 0.954                 |
|              | ASCA-IgG/IgA | 2                 | 2.88 (0.62–13.44)      | 0.179                 |
| GIBD vs. HC  | ASCA-IgG     | 3                 | 5.50 (2.58–11.55)      | 0.000                 |
|              | ASCA-IgA     | 2                 | 2.65 (1.18–5.96)       | 0.018                 |
|              | ASCA-IgG+IgA | 2                 | 5.36 (1.40–20.45)      | 0.014                 |
|              | ASCA-IgG/IgA | 3                 | 2.90 (1.47–5.74)       | 0.002                 |
| GIBD vs. CD  | ASCA-IgG     | 3                 | 0.48(0.28–0.83)        | 0.009                 |
|              | ASCA-IgA     | 3                 | 0.91(0.56–1.46)        | 0.685                 |
|              | ASCA-IgG+IgA | 3                 | 0.58(0.30–1.11)        | 0.100                 |
|              | ASCA-IgG/IgA | 4                 | 0.57 (0.28–1.15)       | 0.117                 |
| GIBD vs. UC  | ASCA-IgG     | 3                 | 1.78 (0.98–3.22)       | 0.057                 |
|              | ASCA-IgA     | 3                 | 2.13 (1.30–3.50)       | 0.003                 |
|              | ASCA-IgG+IgA | 3                 | 2.19 (1.03–4.66)       | 0.042                 |
|              | ASCA-IgG/IgA | 4                 | 2.03 (1.30–3.17)       | 0.002                 |
| GIBD vs. iTB | ASCA-IgG     | 2                 | 1.08 (0.50–2.32)       | 0.854                 |
|              | ASCA-IgA     | 2                 | 1.51 (0.71–3.22)       | 0.290                 |
|              | ASCA-IgG+IgA | 2                 | 1.02 (0.40–2.62)       | 0.972                 |
|              | ASCA-IgG/IgA | 3                 | 1.05 (0.58–1.87)       | 0.883                 |

622

623

624

625

626

627 Table 4 Pooled sensitivity and specificity of ASCA-IgG and IgG/IgA for diagnosis of  
 628 GIBD assessed by ELISA and IIF

629 ELISA: enzyme-linked immunosorbent assay; IIF: indirect immunofluorescence assay

| Methods             | ELISA                       |                             | IIF         |             |
|---------------------|-----------------------------|-----------------------------|-------------|-------------|
| Diagnostic accuracy | Pooled sensitivity (95% CI) | Pooled specificity (95% CI) | Sensitivity | Specificity |
| ASCA-IgG            | 0.20 (0.12–0.31)            | 0.93 (0.86–0.98)            | 0.44        | 0.91        |
| ASCA-IgG/IgA        | 0.33 (0.23–0.44)            | 0.85 (0.76–0.91)            | 0.15        | 0.96        |

630

631

632

633

634

635

636

637

638

639 Table 5 Summary of the diagnostic performance of ASCA in autoimmune disease

640 SEN: sensitivity; SPE: specificity; LR+: positive likelihood; LR-: negative likelihood

| Reference               | Autoimmune disease             | Type        | SEN (%)      | SPE (%)      | LR+       | LR-       | Supplementary information                                                                                                              |
|-------------------------|--------------------------------|-------------|--------------|--------------|-----------|-----------|----------------------------------------------------------------------------------------------------------------------------------------|
| 10                      | Scleroderma                    | IgG         | 43.24        | 98.25        | 24.65     | 0.58      | African descendants showed higher positivity rates for ASCA-IgG. ASCA-IgA was less frequently detected in patients with severe disease |
| 11 [27]                 |                                | IgA         | 16.22        | 94.74        | 3.08      | 0.88      |                                                                                                                                        |
| 12                      | Ankylosing spondylitis         | IgG         | 0–11.63      | 89.74–98.72  | 1.13–3.00 | 0.97–0.98 | ASCA IgA levels were significantly increased in patients with HLA-B27-associated SpA, particularly in AS and uSpA                      |
| 13                      |                                | IgA         | 1.28–23.26   | 91.03–100.00 | 2.59–3.71 | 0.84–0.99 |                                                                                                                                        |
| 14 [39, 40, 41, 42]     | Antiphospholipid syndrome      | IgG/IgA     | 20.00        | 95.00        | /         | /         |                                                                                                                                        |
| 15 [43]                 | Juvenile Idiopathic Arthritis  | IgA         | 0–50.00      | 94.74        | 9.50      | 0.53      |                                                                                                                                        |
| 16                      | Autoimmune hepatitis           | IgG         | 16.42–27.53  | 100.00       | /         | 0.84      |                                                                                                                                        |
| 17 [44]                 |                                | IgA         | 11.94        | 94.74        | 2.27      | 0.93      |                                                                                                                                        |
| 18 [45, 46, 47]         | Primary biliary cirrhosis      | IgG/IgA     | 18.52        | 84.00        | 1.16      | 0.97      |                                                                                                                                        |
| 19                      |                                | IgG         | 10.57–18.95  | 97.50–100.00 | 7.58      | 0.83–0.89 |                                                                                                                                        |
| 20                      | Primary sclerosing cholangitis | IgA         | 11.58–18.70  | 94.74–98.75  | 3.55–9.26 | 0.86–0.90 |                                                                                                                                        |
| 21 [45, 47, 48]         |                                | IgG/IgA     | 20.26–24.21  | 84.00–96.25  | 1.27–6.46 | 0.79–0.95 |                                                                                                                                        |
| 22                      | Crohn's disease                | IgG         | 28.00        | 100.00       | /         | 0.72      |                                                                                                                                        |
| 23 [45, 47]             |                                | IgA         | 32.00        | 94.74        | 6.08      | 0.72      |                                                                                                                                        |
| 24                      | Cryoglobulinemia               | IgG/IgA     | 30.51        | 84.00        | 1.91      | 0.83      |                                                                                                                                        |
| 25 [11, 39, 45, 49, 50] |                                | IgG         | 13.75–69.57  | 97.96–100    | 6.74      | 0.30–0.88 | Patients with more complicated disease course showed a trend for greater seroreactivity towards ASCA.                                  |
| 26                      | IgA                            | 19.30–71.43 | 94.74–100.00 | 9.91–29.40   | 0.50–0.71 |           |                                                                                                                                        |
| 27 [50]                 | Graves' disease                | IgG         | 7.10         | 99.50        | /         | /         |                                                                                                                                        |
| 28 [50, 51, 52]         | Rheumatoid arthritis           | IgG         | 5.70–12.50   | 94.17–99.50  | 2.15–3.76 | 0.91–0.93 | ASCA was elevated in Graves' disease but not in Hashimoto's thyroiditis                                                                |
| 29                      |                                | IgA         | 8.40–16.67   | 94.17–96.88  | 2.69–2.86 | 0.88–0.95 |                                                                                                                                        |
| 30                      | Systemic lupus erythematosus   | IgG         | 10.13–20.00  | 89.74–91.45  | 0.99–2.34 | 0.87–1.00 | ASCA IgA levels strongly correlated with C-reactive protein levels and erythrocyte sedimentation rate                                  |
| 31 [40, 53]             |                                | IgA         | 17.72–40.00  | 91.03–94.74  | 1.97–7.60 | 0.63–0.90 |                                                                                                                                        |
| 32                      | Type 1 diabetes                | IgM         | 13.33        | 94.74        | 2.53      | 0.91      |                                                                                                                                        |
| 33                      |                                | IgG         | 4.50–57.50   | 91.45–99.50  | 6.72–9.38 | 0.46–0.73 | ASCA IgG levels in SLE patients during remission were relatively lower, indicating a possible correlation with disease activity        |
| 34 [49, 54, 55]         | IgA                            | 7.50–12.07  | 94.74–99.38  | 1.43–19.31   | 0.88–0.98 |           |                                                                                                                                        |
| 35                      | Primary Sjögren's syndrome     | IgG/IgA     | 31.90        | 96.25        | 8.51      | 0.71      |                                                                                                                                        |
| 36                      |                                | IgG         | 20.98        | 98.09        | 10.98     | 0.81      |                                                                                                                                        |
| 37 [56]                 | Vasculitides                   | IgA         | 9.82         | 98.73        | 7.71      | 0.91      |                                                                                                                                        |
| 38                      |                                | IgG/IgA     | 24.55        | 97.45        | 9.64      | 0.77      |                                                                                                                                        |
| 39 [57]                 | Primary Sjögren's syndrome     | IgG/IgA     | 4.81         | 100.00       | /         | 0.95      | ASCA positivity was associated with pSS specific clinical and serological features                                                     |
| 40 [50]                 | Vasculitides                   | IgG         | 6.50         | 99.50        | /         | /         |                                                                                                                                        |

641



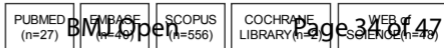

1 Additional records identified through  
2 other sources(n=0)

Records identified through  
database searching(n=625)

3  
4 Records after duplicates  
removed by software(n=574)

5  
6 Records after title and/or  
abstract screening(n=127)

Records excluded by manual  
search and the irrelevant(n=447)

7  
8 Full-text articles assessed for  
eligibility (n=22)

Full-text articles excluded with  
reasons(n=105)

9  
10  
11 Studies included in the  
qualitative synthesis(meta-  
analysis)(n=9)  
12

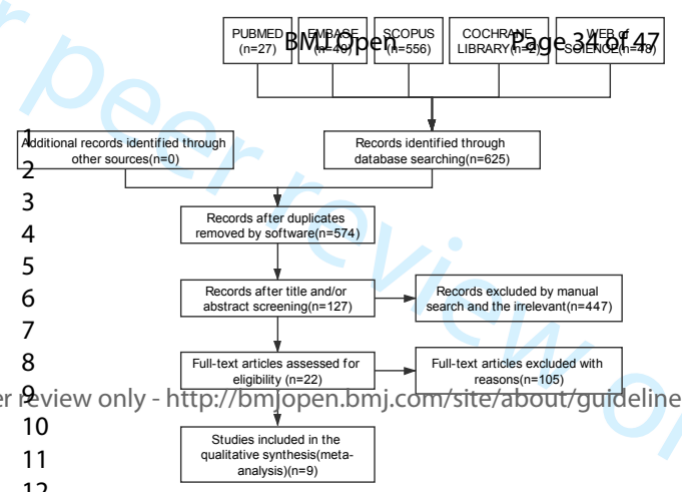

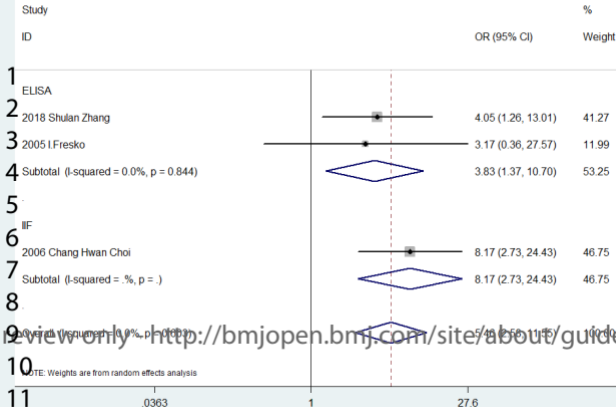

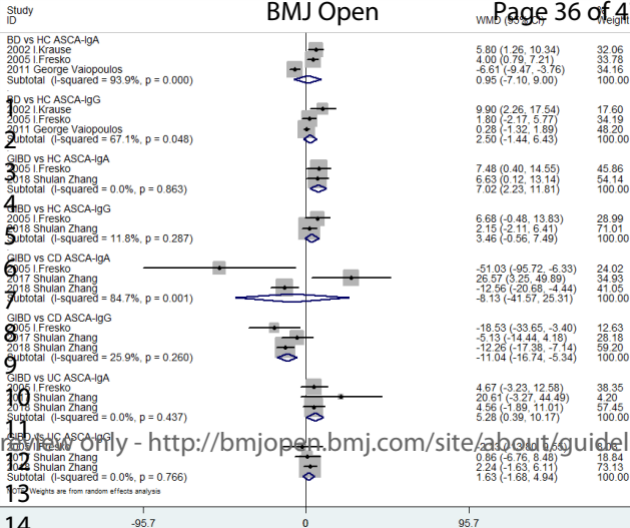

Fig S1 Results of quality assessment of the included studies based on the QUADAS-1 tool

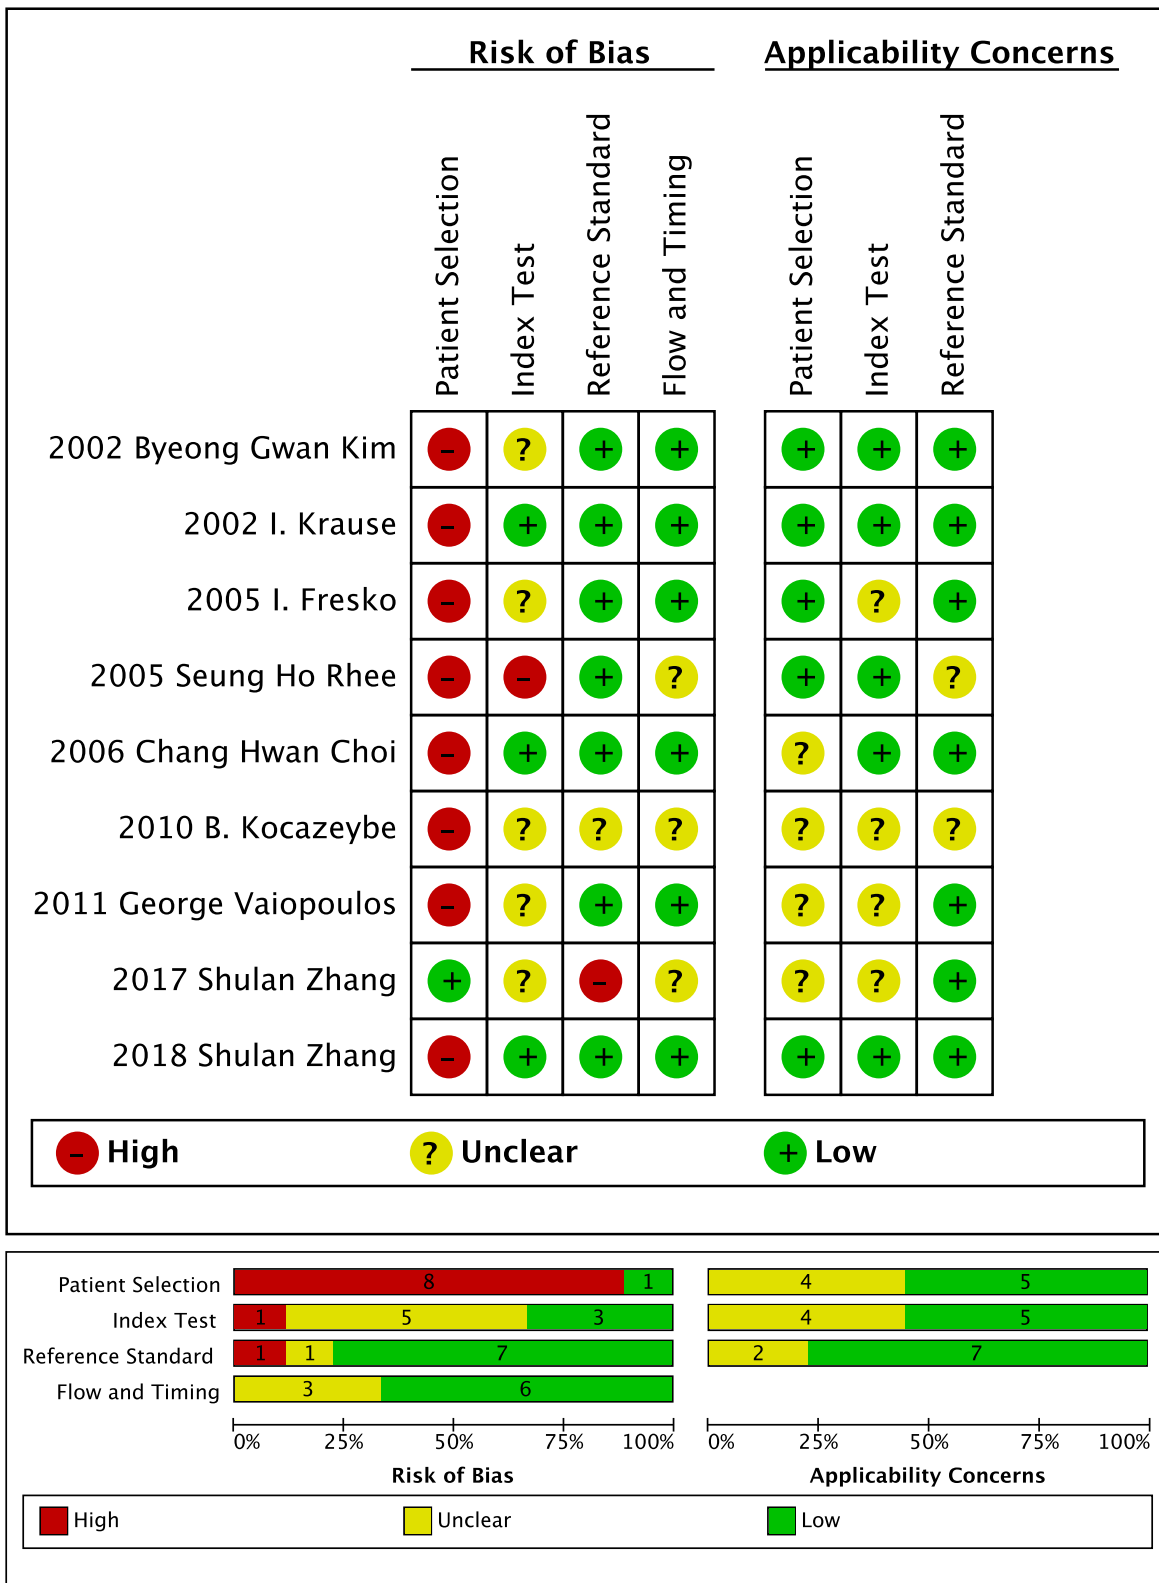

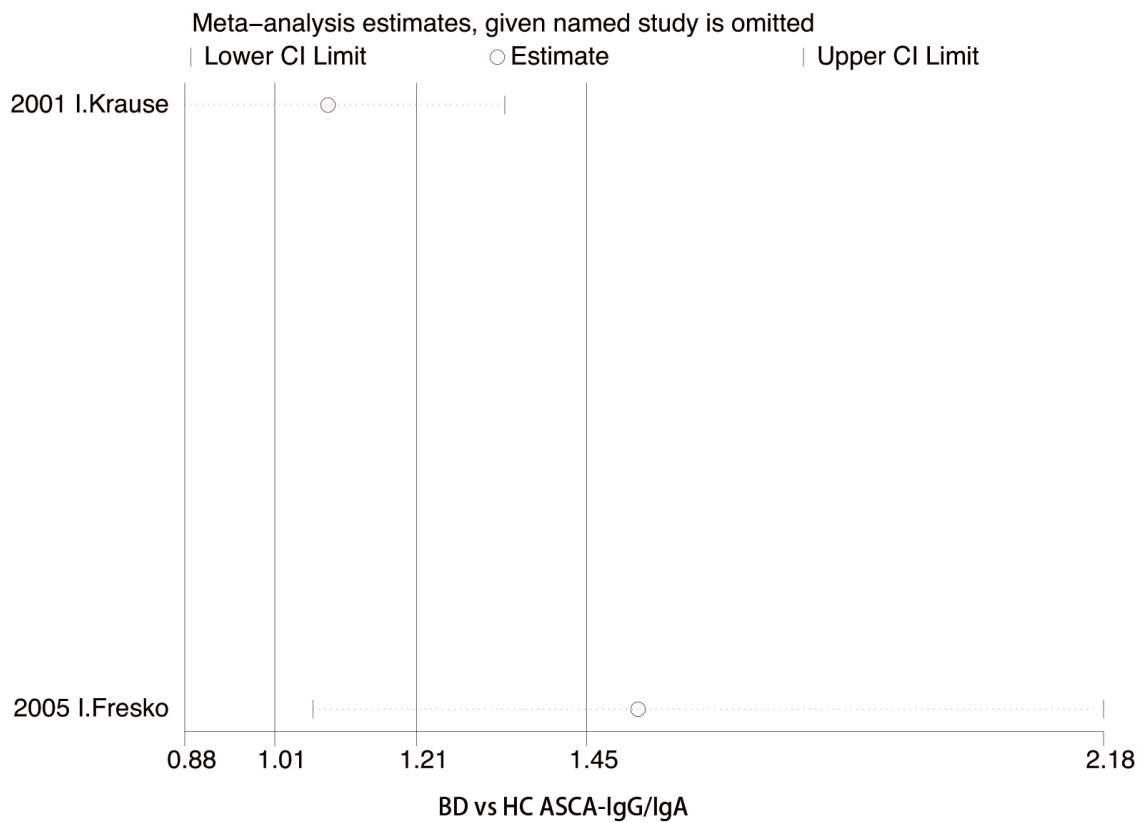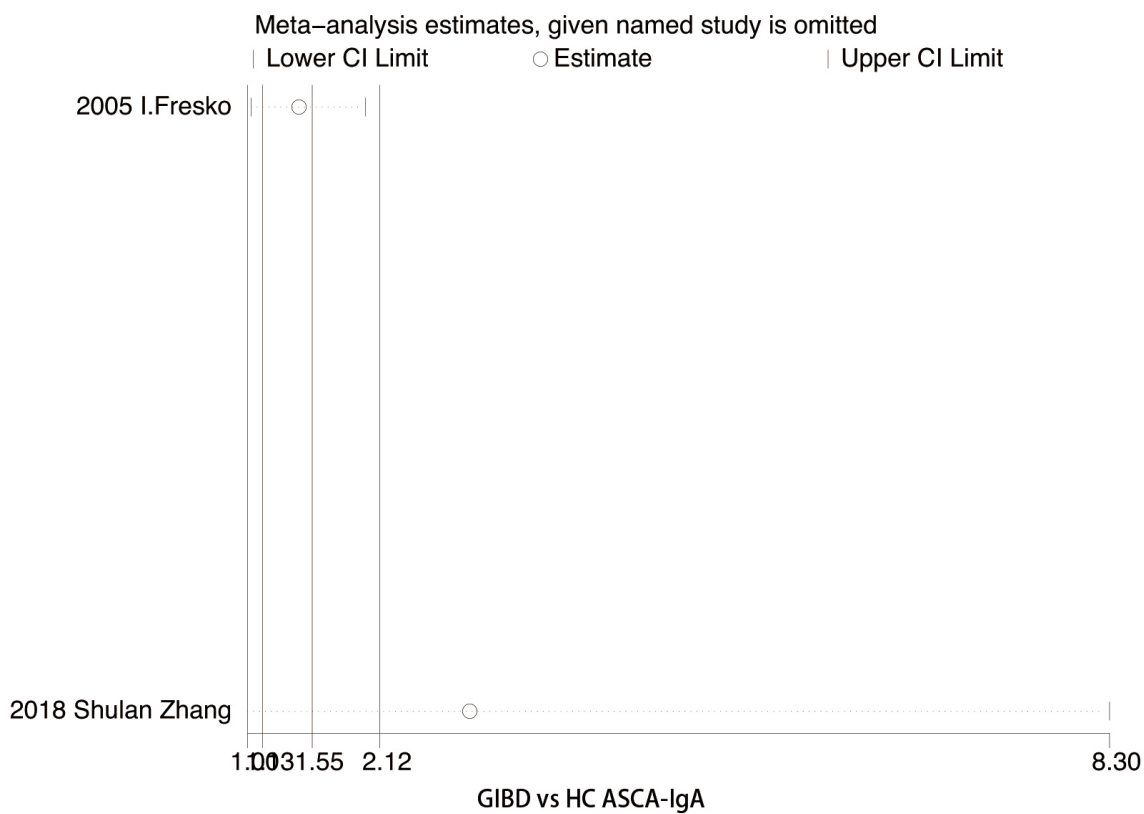

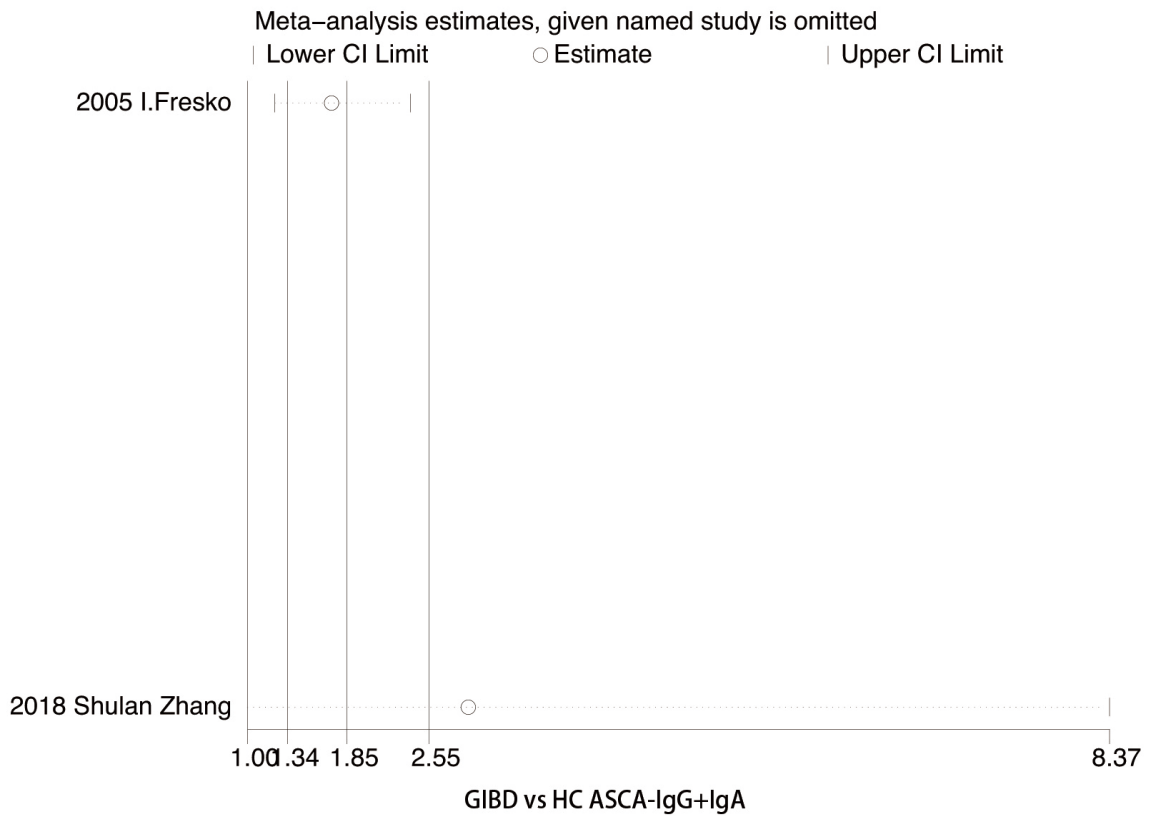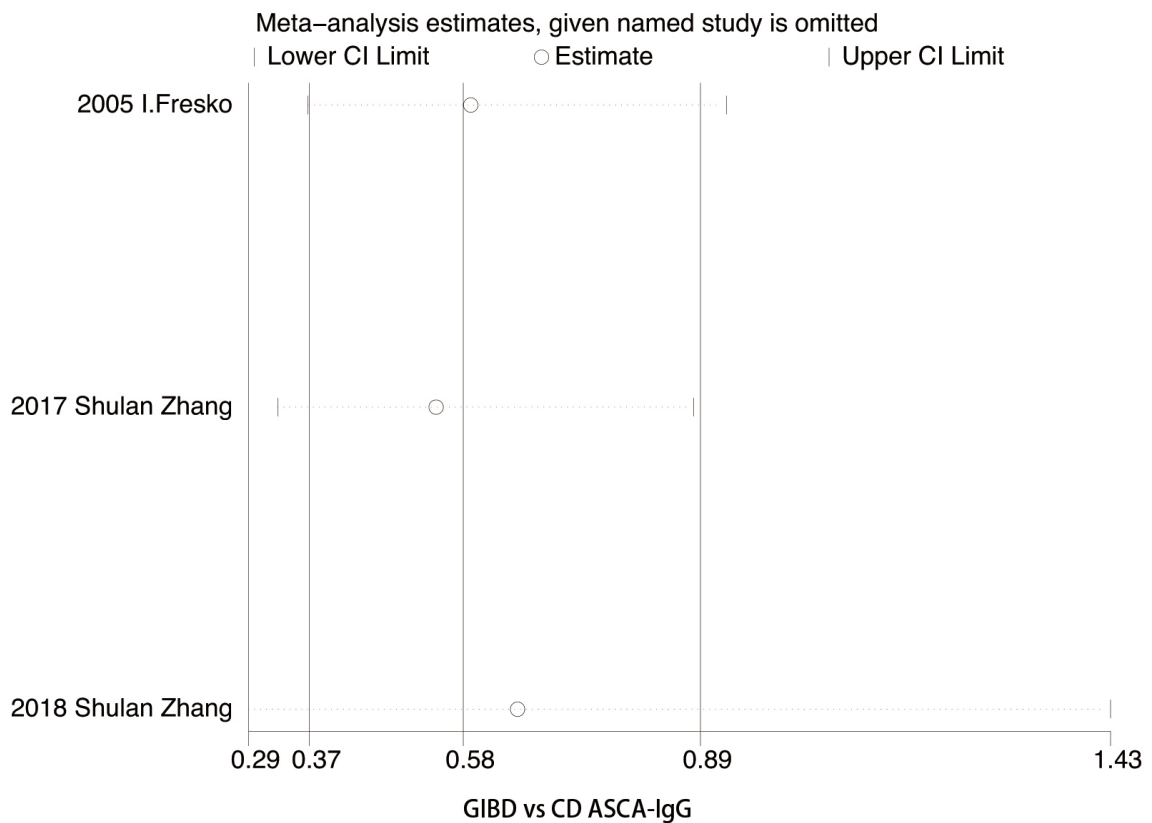

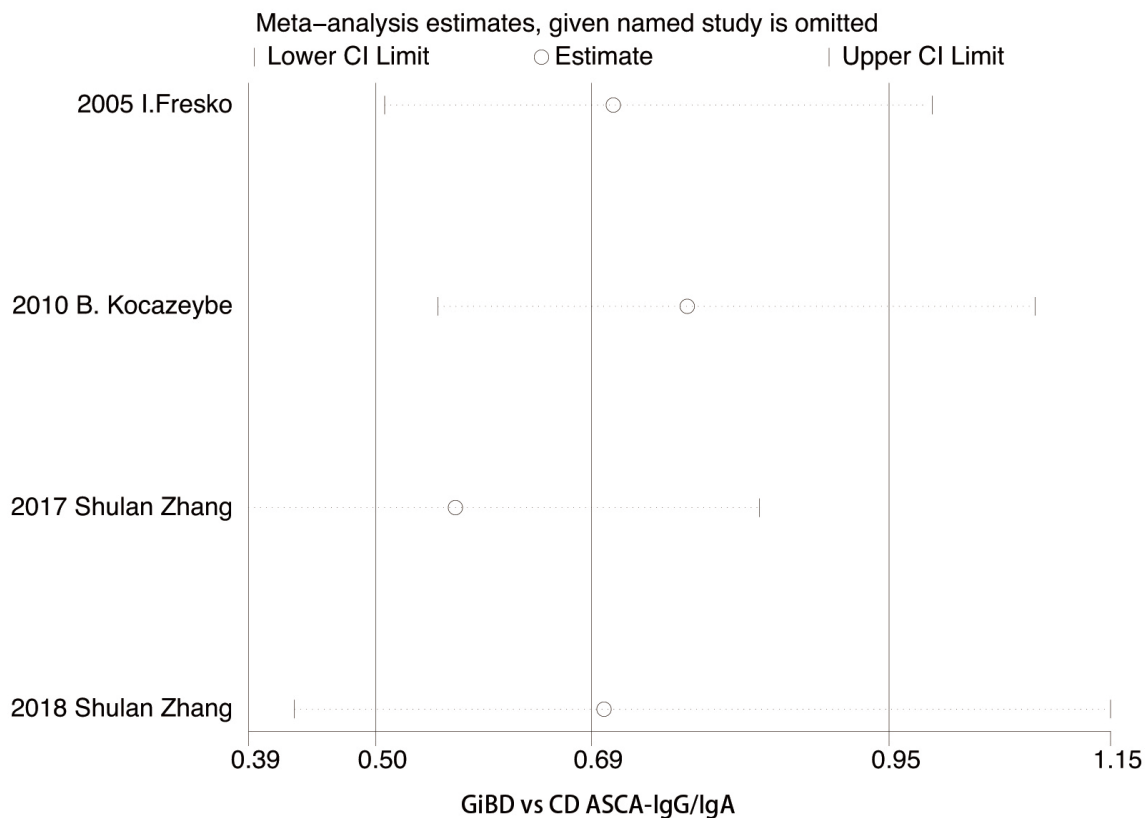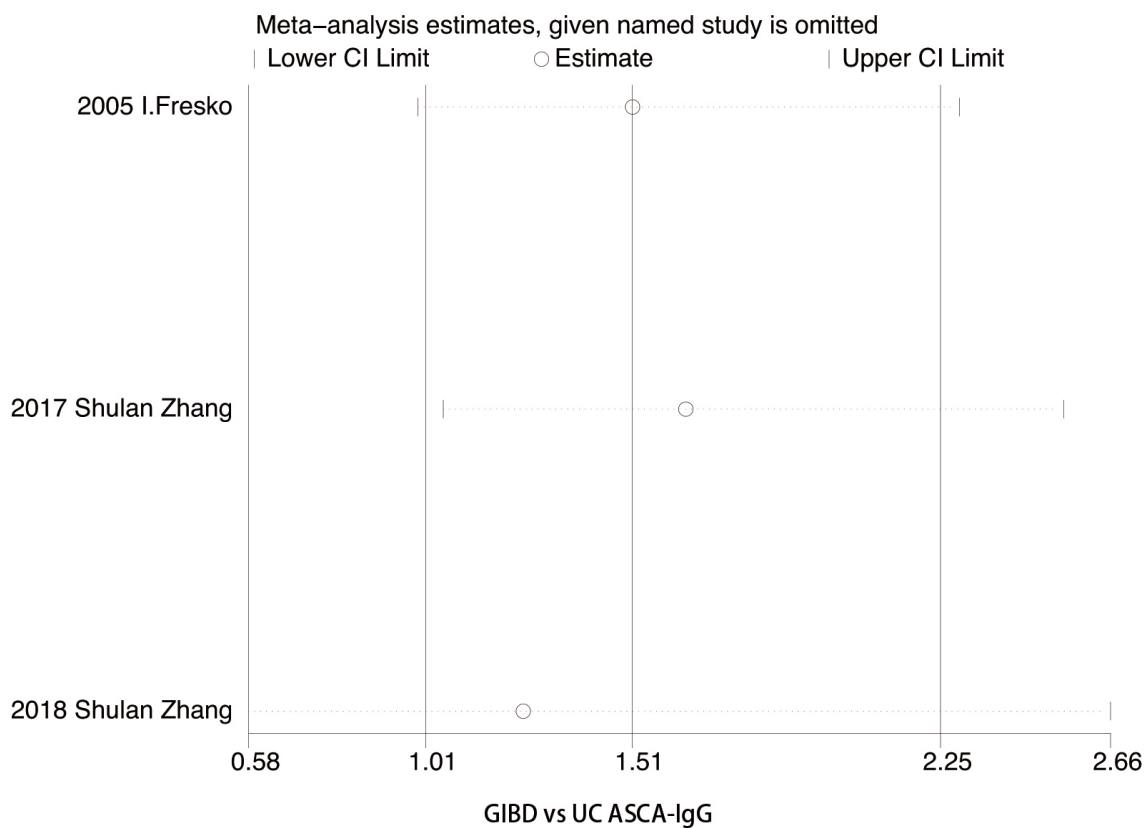

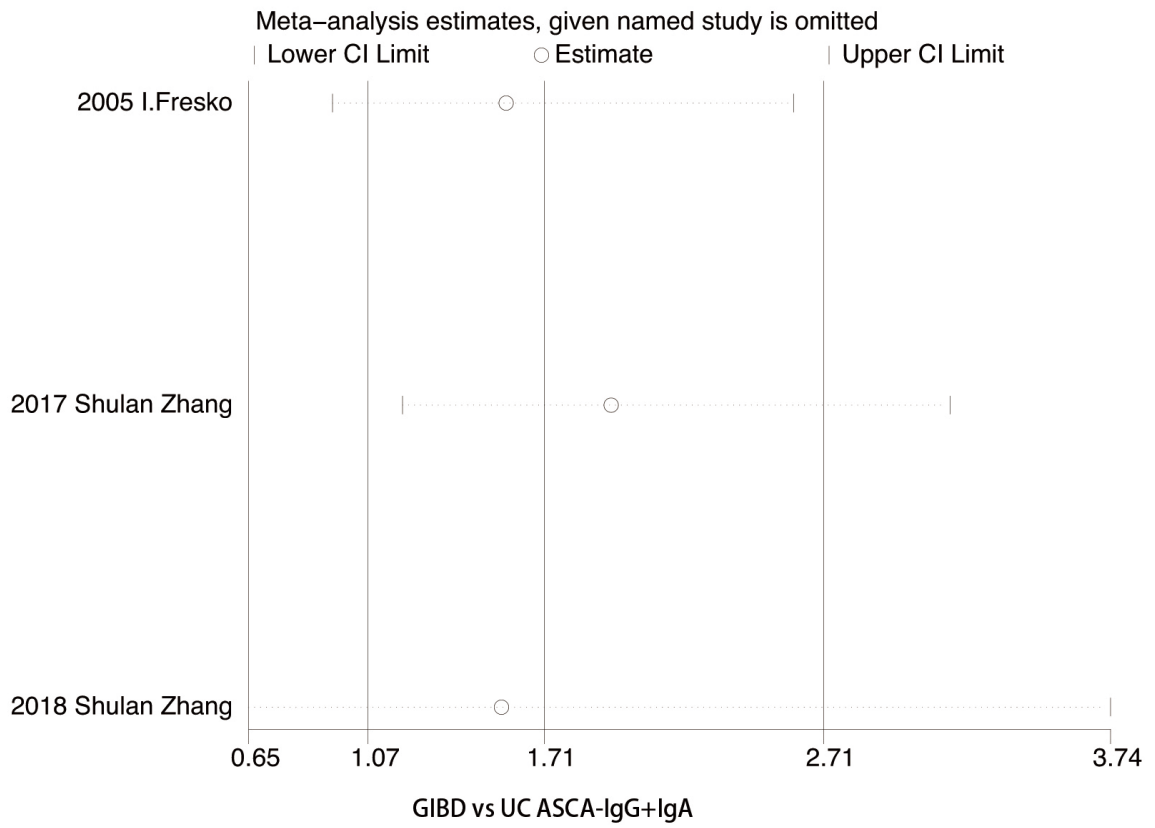

Review only



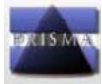

# PRISMA-DTA Checklist

| Section/topic                   | #  | PRISMA-DTA Checklist Item                                                                                                                                                                                                                                                                                                                                     | Reported on page #  |
|---------------------------------|----|---------------------------------------------------------------------------------------------------------------------------------------------------------------------------------------------------------------------------------------------------------------------------------------------------------------------------------------------------------------|---------------------|
| <b>TITLE / ABSTRACT</b>         |    |                                                                                                                                                                                                                                                                                                                                                               |                     |
| Title                           | 1  | Identify the report as a systematic review (+/- meta-analysis) of diagnostic test accuracy (DTA) studies.                                                                                                                                                                                                                                                     | 1                   |
| Abstract                        | 2  | Abstract: See PRISMA-DTA for abstracts.                                                                                                                                                                                                                                                                                                                       | 1                   |
| <b>INTRODUCTION</b>             |    |                                                                                                                                                                                                                                                                                                                                                               |                     |
| Rationale                       | 3  | Describe the rationale for the review in the context of what is already known.                                                                                                                                                                                                                                                                                | 4                   |
| Clinical role of index test     | D1 | State the scientific and clinical background, including the intended use and clinical role of the index test, and if applicable, the rationale for minimally acceptable test accuracy (or minimum difference in accuracy for comparative design).                                                                                                             | 4, 5                |
| Objectives                      | 4  | Provide an explicit statement of question(s) being addressed in terms of participants, index test(s), and target condition(s).                                                                                                                                                                                                                                | 4, 5                |
| <b>METHODS</b>                  |    |                                                                                                                                                                                                                                                                                                                                                               |                     |
| Protocol and registration       | 5  | Indicate if a review protocol exists, if and where it can be accessed (e.g., Web address), and, if available, provide registration information including registration number.                                                                                                                                                                                 | 5<br>CRD42020115245 |
| Eligibility criteria            | 6  | Specify study characteristics (participants, setting, index test(s), reference standard(s), target condition(s), and study design) and report characteristics (e.g., years considered, language, publication status) used as criteria for eligibility, giving rationale.                                                                                      | 6, 7                |
| Information sources             | 7  | Describe all information sources (e.g., databases with dates of coverage, contact with study authors to identify additional studies) in the search and date last searched.                                                                                                                                                                                    | 6, 7                |
| Search                          | 8  | Present full search strategies for all electronic databases and other sources searched, including any limits used, such that they could be repeated.                                                                                                                                                                                                          | 6                   |
| Study selection                 | 9  | State the process for selecting studies (i.e., screening, eligibility, included in systematic review, and, if applicable, included in the meta-analysis).                                                                                                                                                                                                     | 6                   |
| Data collection process         | 10 | Describe method of data extraction from reports (e.g., piloted forms, independently, in duplicate) and any processes for obtaining and confirming data from investigators.                                                                                                                                                                                    | 7                   |
| Definitions for data extraction | 11 | Provide definitions used in data extraction and classifications of target condition(s), index test(s), reference standard(s) and other characteristics (e.g. study design, clinical setting).                                                                                                                                                                 | 7                   |
| Risk of bias and applicability  | 12 | Describe methods used for assessing risk of bias in individual studies and concerns regarding the applicability to the review question.                                                                                                                                                                                                                       | 7                   |
| Diagnostic accuracy measures    | 13 | State the principal diagnostic accuracy measure(s) reported (e.g. sensitivity, specificity) and state the unit of assessment (e.g. per-patient, per-lesion).                                                                                                                                                                                                  | 7, 8                |
| Synthesis of results            | 14 | Describe methods of handling data, combining results of studies and describing variability between studies. This could include, but is not limited to: a) handling of multiple definitions of target condition. b) handling of multiple thresholds of test positivity. c) handling multiple index test readers. d) handling of indeterminate test results, e) | 7, 8                |

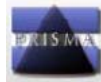

# PRISMA-DTA Checklist

grouping and comparing tests, f) handling of different reference standards

Page 1 of 2

| Section/topic                  | #  | PRISMA-DTA Checklist Item                                                                                                                                                                                                                                                                         | Reported on page # |
|--------------------------------|----|---------------------------------------------------------------------------------------------------------------------------------------------------------------------------------------------------------------------------------------------------------------------------------------------------|--------------------|
| Meta-analysis                  | D2 | Report the statistical methods used for meta-analyses, if performed.                                                                                                                                                                                                                              | 7, 8               |
| Additional analyses            | 16 | Describe methods of additional analyses (e.g., sensitivity or subgroup analyses, meta-regression), if done, indicating which were pre-specified.                                                                                                                                                  | 7-9                |
| <b>RESULTS</b>                 |    |                                                                                                                                                                                                                                                                                                   |                    |
| Study selection                | 17 | Provide numbers of studies screened, assessed for eligibility, included in the review (and included in meta-analysis, if applicable) with reasons for exclusions at each stage, ideally with a flow diagram.                                                                                      | 9, 10              |
| Study characteristics          | 18 | For each included study provide citations and present key characteristics including: a) participant characteristics (presentation, prior testing), b) clinical setting, c) study design, d) target condition definition, e) index test, f) reference standard, g) sample size, h) funding sources | 9, 10              |
| Risk of bias and applicability | 19 | Present evaluation of risk of bias and concerns regarding applicability for each study.                                                                                                                                                                                                           | 10                 |
| Results of individual studies  | 20 | For each analysis in each study (e.g. unique combination of index test, reference standard, and positivity threshold) report 2x2 data (TP, FP, FN, TN) with estimates of diagnostic accuracy and confidence intervals, ideally with a forest or receiver operator characteristic (ROC) plot.      | 10                 |
| Synthesis of results           | 21 | Describe test accuracy, including variability; if meta-analysis was done, include results and confidence intervals.                                                                                                                                                                               | 10-12              |
| Additional analysis            | 23 | Give results of additional analyses, if done (e.g., sensitivity or subgroup analyses, meta-regression; analysis of index test: failure rates, proportion of inconclusive results, adverse events).                                                                                                | 12                 |
| <b>DISCUSSION</b>              |    |                                                                                                                                                                                                                                                                                                   |                    |
| Summary of evidence            | 24 | Summarize the main findings including the strength of evidence.                                                                                                                                                                                                                                   | 14                 |
| Limitations                    | 25 | Discuss limitations from included studies (e.g. risk of bias and concerns regarding applicability) and from the review process (e.g. incomplete retrieval of identified research).                                                                                                                | 16, 17             |
| Conclusions                    | 26 | Provide a general interpretation of the results in the context of other evidence. Discuss implications for future research and clinical practice (e.g. the intended use and clinical role of the index test).                                                                                     | 17                 |
| <b>FUNDING</b>                 |    |                                                                                                                                                                                                                                                                                                   |                    |
| Funding                        | 27 | For the systematic review, describe the sources of funding and other support and the role of the funders.                                                                                                                                                                                         | 18                 |

Adapted From: McInnes MDF, Moher D, Thoms BD, McGrath TA, Bossuyt PM, The PRISMA-DTA Group (2018). Preferred Reporting Items for a Systematic Review and Meta-analysis of Diagnostic Test Accuracy Studies: The PRISMA-DTA Statement. JAMA. 2018 Jan 23;319(4):388-396. doi: 10.1001/jama.2017.19163.

For more information, visit: [www.prisma-statement.org](http://www.prisma-statement.org).

# Reporting checklist for meta-analysis of observational studies.

Based on the MOOSE guidelines.

|                   | Reporting Item                                                                                                                                                                                                                                                                                                                                        | Page Number                                                                |
|-------------------|-------------------------------------------------------------------------------------------------------------------------------------------------------------------------------------------------------------------------------------------------------------------------------------------------------------------------------------------------------|----------------------------------------------------------------------------|
| <b>Title</b>      |                                                                                                                                                                                                                                                                                                                                                       |                                                                            |
|                   | <a href="#">#1</a> Identify the study as a meta-analysis of observational research                                                                                                                                                                                                                                                                    | 1                                                                          |
| <b>Abstract</b>   |                                                                                                                                                                                                                                                                                                                                                       |                                                                            |
|                   | <a href="#">#2</a> Provide a structured summary including, as applicable: background; objectives; data sources; study eligibility criteria, participants, and interventions; study appraisal and synthesis methods; results; limitations; conclusions and implications of key findings; systematic review registration number (From PRISMA checklist) | 1-2                                                                        |
| <b>Background</b> |                                                                                                                                                                                                                                                                                                                                                       |                                                                            |
|                   | <a href="#">#3a</a> Problem definition                                                                                                                                                                                                                                                                                                                | 4                                                                          |
|                   | <a href="#">#3b</a> Hypothesis statement                                                                                                                                                                                                                                                                                                              | 4-5                                                                        |
|                   | <a href="#">#3c</a> Description of study outcomes                                                                                                                                                                                                                                                                                                     | n/a                                                                        |
|                   |                                                                                                                                                                                                                                                                                                                                                       | The study outcomes were reported in the section of Results and Discussion. |
|                   | <a href="#">#3d</a> Type of exposure or intervention used                                                                                                                                                                                                                                                                                             | 4                                                                          |
|                   | <a href="#">#3e</a> Type of study designs used                                                                                                                                                                                                                                                                                                        | 4                                                                          |
|                   | <a href="#">#3f</a> Study population                                                                                                                                                                                                                                                                                                                  | 4, 5                                                                       |
| <b>Methods</b>    |                                                                                                                                                                                                                                                                                                                                                       |                                                                            |
| Search            | <a href="#">#4a</a> Qualifications of searchers (eg, librarians and                                                                                                                                                                                                                                                                                   | 6, 7                                                                       |

|    |          |                                                                                |                                        |
|----|----------|--------------------------------------------------------------------------------|----------------------------------------|
| 1  | strategy | investigators)                                                                 |                                        |
| 2  |          |                                                                                |                                        |
| 3  | Search   | <a href="#">#4b</a> Search strategy, including time period included in the     | 5, 6                                   |
| 4  | strategy | synthesis and keywords                                                         |                                        |
| 5  |          |                                                                                |                                        |
| 6  | Search   | <a href="#">#4c</a> Effort to include all available studies, including contact | 7                                      |
| 7  | strategy | with authors                                                                   |                                        |
| 8  |          |                                                                                |                                        |
| 9  |          |                                                                                |                                        |
| 10 | Search   | <a href="#">#4d</a> Databases and registries searched                          | 5, 6                                   |
| 11 | strategy |                                                                                |                                        |
| 12 |          |                                                                                |                                        |
| 13 |          |                                                                                |                                        |
| 14 | Search   | <a href="#">#4e</a> Search software used, name and version, including          | n/a                                    |
| 15 | strategy | special features used (eg, explosion)                                          |                                        |
| 16 |          |                                                                                | The search was performed on website of |
| 17 |          |                                                                                | databases                              |
| 18 |          |                                                                                |                                        |
| 19 |          |                                                                                |                                        |
| 20 |          |                                                                                |                                        |
| 21 |          |                                                                                |                                        |
| 22 | Search   | <a href="#">#4f</a> Use of hand searching (eg, reference lists of obtained     | 6                                      |
| 23 | strategy | articles)                                                                      |                                        |
| 24 |          |                                                                                |                                        |
| 25 |          |                                                                                |                                        |
| 26 | Search   | <a href="#">#4g</a> List of citations located and those excluded, including    | 6, 7                                   |
| 27 | strategy | justification                                                                  |                                        |
| 28 |          |                                                                                |                                        |
| 29 |          |                                                                                |                                        |
| 30 | Search   | <a href="#">#4h</a> Method of addressing articles published in languages       | 6                                      |
| 31 | strategy | other than English                                                             |                                        |
| 32 |          |                                                                                |                                        |
| 33 |          |                                                                                |                                        |
| 34 | Search   | <a href="#">#4i</a> Method of handling abstracts and unpublished studies       | 6                                      |
| 35 | strategy |                                                                                |                                        |
| 36 |          |                                                                                |                                        |
| 37 |          |                                                                                |                                        |
| 38 | Search   | <a href="#">#4j</a> Description of any contact with authors                    | 7                                      |
| 39 | strategy |                                                                                |                                        |
| 40 |          |                                                                                |                                        |
| 41 |          |                                                                                |                                        |
| 42 |          | <a href="#">#5a</a> Description of relevance or appropriateness of studies     | 7                                      |
| 43 |          | gathered for assessing the hypothesis to be tested                             |                                        |
| 44 |          |                                                                                |                                        |
| 45 |          |                                                                                |                                        |
| 46 |          | <a href="#">#5b</a> Rationale for the selection and coding of data (eg,        | 7                                      |
| 47 |          | sound clinical principles or convenience)                                      |                                        |
| 48 |          |                                                                                |                                        |
| 49 |          |                                                                                |                                        |
| 50 |          | <a href="#">#5c</a> Documentation of how data were classified and coded        | 7                                      |
| 51 |          | (eg, multiple raters, blinding, and interrater reliability)                    |                                        |
| 52 |          |                                                                                |                                        |
| 53 |          |                                                                                |                                        |
| 54 |          | <a href="#">#5d</a> Assessment of confounding (eg, comparability of cases      | 7                                      |
| 55 |          | and controls in studies where appropriate)                                     |                                        |
| 56 |          |                                                                                |                                        |
| 57 |          |                                                                                |                                        |
| 58 |          | <a href="#">#5e</a> Assessment of study quality, including blinding of quality | 7                                      |
| 59 |          |                                                                                |                                        |
| 60 |          |                                                                                |                                        |

assessors; stratification or regression on possible predictors of study results

[#5f](#) Assessment of heterogeneity 8

[#5g](#) Description of statistical methods (eg, complete description of fixed or random effects models, justification of whether the chosen models account for predictors of study results, dose-response models, or cumulative meta-analysis) in sufficient detail to be replicated 8

[#5h](#) Provision of appropriate tables and graphics n/a

The methods were described in text instead of tables and graphics.

## Results

[#6a](#) Graphic summarizing individual study estimates and overall estimate 10-12

[#6b](#) Table giving descriptive information for each study included 9, 10

[#6c](#) Results of sensitivity testing (eg, subgroup analysis) 12

[#6d](#) Indication of statistical uncertainty of findings 12

## Discussion

[#7a](#) Quantitative assessment of bias (eg. publication bias) n/a

Small number of studies in each subgroup prevented publication bias analysis

[#7b](#) Justification for exclusion (eg, exclusion of non-English-language citations) 16

|    |                     |                                                                                                                           |        |
|----|---------------------|---------------------------------------------------------------------------------------------------------------------------|--------|
| 1  | <a href="#">#7c</a> | Assessment of quality of included studies                                                                                 | 15, 16 |
| 2  |                     |                                                                                                                           |        |
| 3  | <b>Conclusion</b>   |                                                                                                                           |        |
| 4  |                     |                                                                                                                           |        |
| 5  |                     |                                                                                                                           |        |
| 6  | <a href="#">#8a</a> | Consideration of alternative explanations for observed results                                                            | 17     |
| 7  |                     |                                                                                                                           |        |
| 8  |                     |                                                                                                                           |        |
| 9  |                     |                                                                                                                           |        |
| 10 | <a href="#">#8b</a> | Generalization of the conclusions (ie, appropriate for the data presented and within the domain of the literature review) | 17     |
| 11 |                     |                                                                                                                           |        |
| 12 |                     |                                                                                                                           |        |
| 13 |                     |                                                                                                                           |        |
| 14 |                     |                                                                                                                           |        |
| 15 | <a href="#">#8c</a> | Guidelines for future research                                                                                            | 17     |
| 16 |                     |                                                                                                                           |        |
| 17 |                     |                                                                                                                           |        |
| 18 | <a href="#">#8d</a> | Disclosure of funding source                                                                                              | 18     |
| 19 |                     |                                                                                                                           |        |

20 Reproduced with permission from JAMA. 2000. 283(15):2008-2012. Copyright © 2000 American  
21 Medical Association. All rights reserved. This checklist was completed on 26. August 2019 using  
22 <https://www.goodreports.org/>, a tool made by the [EQUATOR Network](#) in collaboration with  
23 [Penelope.ai](#)  
24  
25  
26  
27  
28  
29  
30  
31  
32  
33  
34  
35  
36  
37  
38  
39  
40  
41  
42  
43  
44  
45  
46  
47  
48  
49  
50  
51  
52  
53  
54  
55  
56  
57  
58  
59  
60

Table S3 Demographic characteristics of patients and healthy controls included in the meta-analysis

BD: Behçet's disease; GIBD: gastrointestinal Behçet's disease; CD: Crohn's disease; UC: ulcerative colitis; iTB: intestinal tuberculosis; HC: healthy control; /: No such group included; Blank: no such information in the article

|                                       | BD               | GIBD             | CD                  | UC                  | iTB      | HC                  |
|---------------------------------------|------------------|------------------|---------------------|---------------------|----------|---------------------|
| <b>Female, n (%)</b>                  |                  |                  |                     |                     |          |                     |
| 2018 Shulan Zhang                     | /                |                  |                     |                     |          | /                   |
| 2017 Shulan Zhang                     |                  |                  | 37 (28.9)           | 69 (49.3)           |          |                     |
| 2011 George Vaiopoulos                | 28 (48.3)        | /                | /                   | /                   | /        |                     |
| 2010 B. Kocazeybek                    | /                | 5 (38.5)         | 39 (61.9)           | 51 (50.0)           | 3 (30.0) | 99 (60.0)           |
| 2006 Chang Hwan Choi                  | 16 (86.6)        | 47 (44.3)        | /                   | /                   | /        | 24 (53.3)           |
| 2005 I. Fresko                        | 20 (23.5)        | 2 (25.0)         | 10 (41.7)           | 10 (40.0)           | /        | 9 (42.9)            |
| 2005 Seung-Ho Rhee                    | /                | 28 (63.6)        | /                   | /                   | /        |                     |
| 2002 I. Krause                        | 20 (74.1)        |                  |                     |                     |          |                     |
| 2002 Byeong Gwan Kim                  | /                | 20               | 28                  | 36                  | 7        |                     |
| <b>Median age at study (max, min)</b> |                  |                  |                     |                     |          |                     |
| 2018 Shulan Zhang                     | /                |                  |                     |                     |          |                     |
| 2017 Shulan Zhang                     | /                |                  | 33 (69,13)          | 42 (76,13)          |          | /                   |
| 2011 George Vaiopoulos                | 38.5 (17,70)     | /                | /                   | /                   | /        |                     |
| 2010 B. Kocazeybek                    | /                | 32.11 (23.22,41) | 37.56 (24.91,50.21) | 40.72 (27.28,54.16) | SD 9.96  | 35.07 (24.58,45.56) |
| 2006 Chang Hwan Choi                  | 38 (18,65)       | 37               | /                   | /                   | /        | 39 (16,69)          |
| 2005 I. Fresko                        | 34.3 (32.0,36.7) | 26.9 (24.1,29.6) | 38.9 (34.6,43.2)    | 35.6 (33.0,38.3)    | /        | 33.7 (30.4,37.0)    |
| 2005 Seung-Ho Rhee                    | /                | 37.6             | /                   | /                   | /        |                     |
| 2002 I. Krause                        | 41.6 (36.9,46.2) |                  |                     |                     |          |                     |
| 2002 Byeong Gwan Kim                  | /                | 43.2             | 40.9                | 30.6                | 33.6     |                     |

# BMJ Open

## Meta-analysis of anti- *Saccharomyces cerevisiae* antibodies as diagnostic markers of Behçet's disease with gastrointestinal involvement

|                                 |                                                                                                                                                                                                                                                                                                                                                                                                                                                                                                                                                                                                                                                                                                                                                                                                                            |
|---------------------------------|----------------------------------------------------------------------------------------------------------------------------------------------------------------------------------------------------------------------------------------------------------------------------------------------------------------------------------------------------------------------------------------------------------------------------------------------------------------------------------------------------------------------------------------------------------------------------------------------------------------------------------------------------------------------------------------------------------------------------------------------------------------------------------------------------------------------------|
| Journal:                        | <i>BMJ Open</i>                                                                                                                                                                                                                                                                                                                                                                                                                                                                                                                                                                                                                                                                                                                                                                                                            |
| Manuscript ID                   | bmjopen-2019-033880.R2                                                                                                                                                                                                                                                                                                                                                                                                                                                                                                                                                                                                                                                                                                                                                                                                     |
| Article Type:                   | Original research                                                                                                                                                                                                                                                                                                                                                                                                                                                                                                                                                                                                                                                                                                                                                                                                          |
| Date Submitted by the Author:   | 15-May-2020                                                                                                                                                                                                                                                                                                                                                                                                                                                                                                                                                                                                                                                                                                                                                                                                                |
| Complete List of Authors:       | Cheng, Linlin; Peking Union Medical College Hospital, Peking Union Medical College and Chinese Academy of Medical Sciences, Department of Clinical Laboratory<br>Li, Liubing; Peking Union Medical College Hospital, Peking Union Medical College and Chinese Academy of Medical Sciences, Department of Clinical Laboratory<br>Liu, Chenxi; Peking Union Medical College Hospital, Peking Union Medical College and Chinese Academy of Medical Sciences, Department of Clinical Laboratory<br>Yan, Songxin; Peking Union Medical College Hospital, Peking Union Medical College and Chinese Academy of Medical Sciences, Department of Clinical Laboratory<br>Li, Yongzhe; Peking Union Medical College Hospital, Peking Union Medical College and Chinese Academy of Medical Sciences, Department of Clinical Laboratory |
| <b>Primary Subject Heading</b>: | Rheumatology                                                                                                                                                                                                                                                                                                                                                                                                                                                                                                                                                                                                                                                                                                                                                                                                               |
| Secondary Subject Heading:      | Diagnostics, Epidemiology, Gastroenterology and hepatology, Immunology (including allergy)                                                                                                                                                                                                                                                                                                                                                                                                                                                                                                                                                                                                                                                                                                                                 |
| Keywords:                       | Behçet's disease, Anti-saccharomyces cerevisiae antibodies, autoimmune diseases, meta-analysis, autoantibodies                                                                                                                                                                                                                                                                                                                                                                                                                                                                                                                                                                                                                                                                                                             |
|                                 |                                                                                                                                                                                                                                                                                                                                                                                                                                                                                                                                                                                                                                                                                                                                                                                                                            |

SCHOLARONE™  
Manuscripts





I, the Submitting Author has the right to grant and does grant on behalf of all authors of the Work (as defined in the below author licence), an exclusive licence and/or a non-exclusive licence for contributions from authors who are: i) UK Crown employees; ii) where BMJ has agreed a CC-BY licence shall apply, and/or iii) in accordance with the terms applicable for US Federal Government officers or employees acting as part of their official duties; on a worldwide, perpetual, irrevocable, royalty-free basis to BMJ Publishing Group Ltd ("BMJ") its licensees and where the relevant Journal is co-owned by BMJ to the co-owners of the Journal, to publish the Work in this journal and any other BMJ products and to exploit all rights, as set out in our [licence](#).

The Submitting Author accepts and understands that any supply made under these terms is made by BMJ to the Submitting Author unless you are acting as an employee on behalf of your employer or a postgraduate student of an affiliated institution which is paying any applicable article publishing charge ("APC") for Open Access articles. Where the Submitting Author wishes to make the Work available on an Open Access basis (and intends to pay the relevant APC), the terms of reuse of such Open Access shall be governed by a Creative Commons licence – details of these licences and which [Creative Commons](#) licence will apply to this Work are set out in our licence referred to above.

Other than as permitted in any relevant BMJ Author's Self Archiving Policies, I confirm this Work has not been accepted for publication elsewhere, is not being considered for publication elsewhere and does not duplicate material already published. I confirm all authors consent to publication of this Work and authorise the granting of this licence.

1  
2  
3  
4 1 **Meta-analysis of anti- *Saccharomyces cerevisiae* antibodies as diagnostic**  
5  
6  
7 2 **markers of Behçet's disease with gastrointestinal involvement**  
8  
9  
10 3

11  
12  
13  
14 4 **Linlin Cheng, MD,<sup>a</sup> Liubing Li, MD,<sup>a</sup> Chenxi Liu, MD,<sup>a</sup> Songxin Yan, MS,<sup>a</sup> Yongzhe**  
15  
16 5 **Li, PhD<sup>a\*</sup>.**

17  
18  
19  
20 6 **<sup>a</sup>Department of Clinical Laboratory, Peking Union Medical College Hospital, Peking**  
21  
22 7 **Union Medical College and Chinese Academy of Medical Sciences, Beijing, China**

23  
24  
25  
26 8 **For correspondence: Yongzhe Li\***

27  
28  
29  
30 9 **Email address: [yongzhelipumch@126.com](mailto:yongzhelipumch@126.com)**  
31  
32  
33  
34 10  
35  
36  
37 11  
38  
39  
40  
41 12  
42  
43  
44 13  
45  
46  
47  
48 14  
49  
50  
51 15  
52  
53  
54  
55 16  
56  
57  
58  
59  
60

1  
2  
3  
4 17 **Meta-analysis of anti- *Saccharomyces cerevisiae* antibodies as diagnostic**  
5  
6  
7 18 **markers of Behçet's disease with gastrointestinal involvement**  
8  
9  
10  
11  
12  
13

14 20 **Abstract**

15  
16  
17 21 **Objective:** Due to common exposure to yeast in the alcoholic and baking industry, positive  
18  
19  
20 22 rate of anti-*Saccharomyces cerevisiae* antibodies (ASCA) is reportedly high in patients  
21  
22  
23 23 with Behçet's disease (BD) who have gastrointestinal symptoms (gastrointestinal BD  
24  
25  
26 24 [GIBD]). We performed a meta-analysis to assess the diagnostic value of ASCA in  
27  
28 25 differentiating patients with BD from those with other chronic inflammatory bowel  
29  
30  
31 26 diseases.

32  
33  
34 27 **Methods:** The meta-analysis is compliant with the PRISMA and MOOSE checklist.

35  
36  
37 28 Relevant studies that investigated ASCA levels in BD patients were retrieved from  
38  
39  
40 29 PubMed, EMBASE, Web of Science, SCOPUS, and the Cochrane Library on July 12,  
41  
42  
43 30 2019; the search was rerun on February 12, 2020. Stata/SE 12.0 and Meta-DiSc 1.4 were  
44  
45  
46 31 used to perform the meta-analysis and sensitivity analysis, disaggregated by isotypes of  
47  
48  
49 32 ASCA.

50  
51  
52 33 **Results:** Nine studies were included in the meta-analysis. The results revealed a strong  
53  
54  
55 34 association between ASCA and GIBD, especially ASCA-IgG [odds ratio (OR)=5.50 (95%

1  
2  
3  
4 35 CI 2.58–11.55, p=0.000) and ASCA-IgG+IgA [OR=5.36 (95% CI 1.40–20.45), p=0.014].  
5  
6

7 36 The positivity rate of ASCA in GIBD was significantly higher than that in ulcerative colitis:  
8

9 37 IgA [OR=2.13 (95% CI 1.30–3.50), p=0.003]; IgG+IgA [OR=2.19 (95% CI 1.03–4.66),  
10

11 38 p=0.042]; IgG/IgA [OR=2.03 (95% CI 1.30–3.17), p=0.002]. However, the frequency of  
12

13 39 ASCA-IgG was significantly higher in patients with Crohn's disease than GIBD [OR=5.36  
14

15 40 (95% CI 1.40–20.45), p=0.009]. There was no significant difference in ASCA positivity  
16

17 41 between BD without gastrointestinal involvement and healthy controls and between GIBD  
18

19 42 and intestinal tuberculosis (p>0.05).  
20  
21  
22  
23  
24  
25

26 43 **Conclusion:** ASCA may play a role in the pathogenesis of gastrointestinal involvement.  
27

28 44 Negative result of IgG favors the diagnosis of GIBD/BD when differentiated from Crohn's  
29

30 45 disease. ASCA-IgA showed moderate diagnostic performance in distinguishing GIBD and  
31

32 46 ulcerative colitis and the diagnostic performance was better in combination with IgG.  
33

34 47 However, ASCA may not be a useful serologic marker distinguishing GIBD and intestinal  
35

36 48 tuberculosis.  
37  
38  
39  
40  
41  
42  
43

44 49 Key words: Behçet's disease; Anti-*Saccharomyces cerevisiae* antibodies; autoimmune  
45

46 50 diseases; meta-analysis; autoantibodies  
47  
48  
49  
50  
51  
52  
53  
54  
55  
56  
57  
58  
59  
60

53

**54 Strengths and limitations of this study**

- 55 • In addition to the healthy controls, we included patients with other gastrointestinal  
56 diseases that are considered in the differential diagnosis of gastrointestinal Behcet's  
57 disease in clinical settings (such as ulcerative colitis, Crohn's disease, and intestinal  
58 tuberculosis), in order to improve the clinical awareness of ASCA.
- 59 • Inclusion of both categorical data (positivity rate) and continuous data (serum  
60 concentration) pertaining to anti-*Saccharomyces cerevisiae* antibodies (ASCA)  
61 increases the reliability of the results of meta-analysis.
- 62 • We separately performed meta-analysis of IgG, IgA, and IgG+IgA, which provides  
63 insights into their ability to differentiate BD from other gastrointestinal diseases.
- 64 • Comprehensive summary of evidence linking ASCA and autoimmune diseases  
65 provides preliminary insights into the pathogenicity of *Saccharomyces cerevisiae*.
- 66 • Analysis of too many subgroups contributed to potential heterogeneity due to the small  
67 number of studies included in each subgroup.

68

69

1  
2  
3  
4 70  
5  
6  
78 71 **Introduction**  
9

10  
11 72 Behçet's disease (BD) is a chronic systemic vascular autoimmune/inflammatory disease  
12  
13 73 with a high propensity for recurrence; the pathogenetic mechanisms of this disease are not  
14  
15  
16 74 well elucidated [1]. Virtually no specific histological or laboratory features of BD have  
17  
18  
19 75 been identified. Therefore, the diagnosis of BD is typically challenging as it is mainly based  
20  
21  
22 76 on clinical features [2, 3]. The diagnosis is frequently delayed until the development of  
23  
24  
25 77 clinical manifestations that qualify the diagnostic criteria. The estimated duration between  
26  
27  
28 78 the onset of symptoms and the fulfilment of diagnostic criteria is approximately 4 years  
29  
30 79 [4].

31  
32  
33  
34 80 Moreover, patients with prominent involvement of a particular organ system are easily  
35  
36  
37 81 misdiagnosed. For example, patients who have gastrointestinal symptoms as the main  
38  
39  
40 82 manifestation are liable to be misdiagnosed as having Crohn's disease (CD), ulcerative  
41  
42  
43 83 colitis (UC), or intestinal tuberculosis (iTb). These features make formulating disease  
44  
45 84 criteria difficult, causing deleterious effects on the patients.

46  
47  
48 85 Several recent studies (but not all) have reported the diagnostic value of anti-  
49  
50  
51 86 *Saccharomyces cerevisiae* antibody (ASCA) in BD. *Saccharomyces cerevisiae*, also  
52  
53  
54 87 known as the baker's or brewer's yeast, has long been utilized to ferment the sugars in  
55  
56  
57

1  
2  
3  
4 88 cereals to produce alcoholic beverages; it is also used in the baking industry to raise dough.  
5  
6  
7 89 As a consequence, we are now commonly exposed to yeast [5]. IgG and IgA antibodies  
8  
9  
10 90 against the phosphopeptidomannan of the *S. cerevisiae* cell wall have been discovered as  
11  
12 91 autoantibodies in the sera of patients with BD, especially those with gastrointestinal  
13  
14  
15 92 involvement. This suggests a role of environmental stimuli in the pathogenesis of BD.  
16  
17  
18 93 However, patients with inflammatory bowel disease such as Crohn's disease (CD) also  
19  
20  
21 94 have a high prevalence rate of ASCA due to their similarities [6, 7, 8, 9, 10, 11]. In this  
22  
23  
24 95 context, identification of ASCA as a diagnostic marker for BD is a key imperative. The  
25  
26  
27 96 objectives of this study were to summarize the findings pertaining to the relevance of  
28  
29  
30 97 ASCA in BD and other gastrointestinal diseases and to perform a meta-analysis to assess  
31  
32  
33 98 its diagnostic accuracy for BD.  
34  
35  
36  
37  
38  
39  
40  
41  
42  
43  
44  
45  
46  
47  
48  
49  
50  
51  
52  
53  
54  
55  
56  
57  
58  
59  
60

## 100 **Methods**

### 101 Study design

102 The Preferred Reporting Items for Systematic Reviews and Meta-Analysis Diagnostic Test  
103 Accuracy (PRISMA-DTA) guidelines [12] (supplementary file 1) and Meta-analysis of  
104 Observational Studies in Epidemiology (MOOSE) [13] (supplementary file 2) were  
105 followed throughout the literature search process to structure and design the framework for

1  
2  
3  
4 106 the review [14]. Besides, a predefined protocol was registered with PROSPERO  
5  
6  
7 107 (Registration No. CRD42020115245).  
8  
9  
10  
11 108

#### 109 Literature search

110 A comprehensive literature search was performed to identify studies pertaining to ASCA  
111 as biomarkers for BD in 5 biomedical databases, i.e., PubMed, EMBASE, Web of Science,  
112 SCOPUS, and the Cochrane Library on July 12, 2019. The search terms for Behçet's  
113 disease were: Behçet, triple symptom complex, triple symptom complices, Adamantiades  
114 Behçet and old silk route disease; the search terms for *Saccharomyces cerevisiae* were: *S.*  
115 *cerevisiae*, *Saccaromyces cerevisiae*, *Saccharomyces capensis*, *Saccharomyces*  
116 *diastaticus*, *Saccharomyces italicus*, *Saccharomyces oviformis*, *Saccharomyces uvarum*,  
117 brewer yeast or baker yeast, mannan, manna, polymannan, glucomannan, yeast mannan,  
118 dicoman, humamil, ASCA. Combination of keywords using "AND" was used to retrieve  
119 studies in the range of "all fields" or "all text". The search was rerun on February 12, 2020  
120 to ensure inclusion of recent studies. No restrictions were imposed with respect to time of  
121 publication, region, or ethnicity of the study population. In addition, the reference list of  
122 obtained articles was also examined to identify possible relevant studies. The full search  
123 strategy for EMBASE is shown in supplementary file 3.



1  
2  
3  
4 124  
5  
6  
7

8 125 Eligibility and exclusion criteria  
9

10  
11 126 The inclusion criteria were: (1) studies that evaluated the diagnostic accuracy of ASCA in  
12  
13  
14 127 BD; (2) availability of adequate data pertaining to the prevalence rate or serum levels of  
15  
16  
17 128 ASCA in patients with BD; (3) studies with healthy population and/or disease controls; (4)  
18  
19 129 meeting abstracts or letters to the editor were also included.  
20

21  
22  
23 130 The exclusion criteria were: (1) studies with incomplete data; (2) review articles; (3) non-  
24  
25  
26 131 English articles; (4) in case of studies with overlapping study population, studies with  
27  
28  
29 132 smaller sample size were excluded. Two investigators independently performed the  
30  
31  
32 133 literature search, screened the titles and abstracts, followed by full-text review of eligible  
33  
34 134 studies.  
35

36  
37 135  
38  
39

40  
41 136 Data extraction and quality assessment  
42

43  
44 137 Two independent investigators reviewed the full-text articles, extracted the data, and  
45  
46  
47 138 assessed the study quality using the Quality Assessment of Diagnostic Accuracy Studies  
48  
49  
50 139 (QUADAS-2); The included items were evaluated as yes, no, or uncertain. Inter-researcher  
51  
52  
53 140 disagreements were resolved by consensus, or by a third investigator. Data pertaining to  
54  
55  
56 141 the following variables were extracted: publication year, article type, first author's name,  
57  
58  
59  
60

1  
2  
3  
4 142 country, isotypes of ASCA detected, age and sex, research design, sample size,  
5  
6  
7 143 experimental method, trade names of experimental materials, cut-off values, diagnostic  
8  
9  
10 144 criteria, and serum titers and/or prevalence rate of ASCA in BD, gastrointestinal BD  
11  
12 145 (GIBD), healthy controls (HC), patients with Crohn's disease (CD), ulcerative colitis (UC),  
13  
14  
15 146 and intestinal tuberculosis (iTb). The data were either obtained directly from the article,  
16  
17  
18 147 calculated, or requested from the author via e-mail.  
19  
20

21 148

#### 24 149 Statistical analysis

25  
26  
27  
28 150 Pooled odds ratios (OR) with 95% confidence intervals (CI) were calculated to evaluate  
29  
30  
31 151 the association between ASCA and BD (without gastrointestinal  
32  
33  
34 152 involvement)/GIBD/CD/UC/iTB using Stata/SE 12.0. Meta-DiSc 1.4 was used to calculate  
35  
36  
37 153 the sensitivity, specificity, AUC values, and the area under the summary receiver operating  
38  
39  
40 154 characteristic (SROC) curve to assess the overall diagnostic performance of ASCA.  
41  
42 155 Heterogeneity among the included studies was evaluated using the Cochran's Q-statistic.  
43  
44  
45 156 P values > 0.10 were considered indicative of lack of significant heterogeneity. We chose  
46  
47  
48 157 the random effects models (REM) since REM tends to generalize findings beyond the  
49  
50  
51 158 included studies by assuming that the selected studies are random samples from a larger  
52  
53  
54 159 population [15]. Subgroup analysis was performed disaggregated by the isotypes of ASCA  
55  
56  
57 160 and different disease controls. The isotypes of ASCA were classified and defined as

1  
2  
3  
4 161 follows: IgG, IgA, IgG/IgA (positive results of either IgG or IgA), and IgG+IgA (positive  
5  
6  
7 162 results of both IgG and IgA).  
8  
9

10 163 In order to increase the robustness of the meta-analysis, we also extracted the data  
11  
12  
13 164 pertaining to serum levels of ASCA from five studies and performed meta-analysis using  
14  
15  
16 165 the Continuous data module of Stata/SE 12.0. The REM was used for the analysis and  
17  
18  
19 166 weighted mean difference (WMD) was used as the effect measure if the same unit was  
20  
21  
22 167 used in these studies and there were minor differences with respect to the serum levels of  
23  
24 168 ASCA. Sensitivity analysis was performed using Stata/SE 12.0 to evaluate stability of the  
25  
26  
27 169 results after sequential exclusion of one study at a time.  
28  
29

30 170  
31  
32

### 33 171 Patient and public involvement 34 35 36

37 172 The present study was a meta-analysis and systematic review based on published data.  
38  
39  
40 173 Patients and public were not involved in the study design, conduct, data analysis, and result  
41  
42  
43 174 dissemination.  
44  
45

46 175  
47  
48

### 49 176 Relationship between ASCA and autoimmune disease 50 51 52

53 177 We searched the PubMed for studies pertaining to the relationship between ASCA and  
54  
55  
56 178 autoimmune diseases. The two search terms used were autoimmune disease and  
57  
58

1  
2  
3  
4 179 *Saccharomyces cerevisiae*. We performed an interval statistic of four indicators of ASCA–  
5  
6  
7 180 sensitivity, specificity, positive likelihood (LR+) and negative likelihood (LR-) based on  
8  
9  
10 181 the included studies sorted by diseases.

11  
12  
13 182

## 14 15 16 183 **Results**

### 17 18 19 20 184 Literature search and characteristics of studies

21  
22  
23 185 A total of 625 documents were retrieved on database and manual search. Fifty-one  
24  
25  
26 186 duplicate publications were excluded using the document management software. A total of  
27  
28  
29 187 127 records were retained after screening of titles and/or abstracts; the excluded records  
30  
31  
32 188 included review articles, animal model studies, therapeutic or drug research, genetic  
33  
34  
35 189 research, book chapters, duplicate publications not recognized by software, and other  
36  
37  
38 190 irrelevant records. After full-text review for eligibility, 22 records were selected. Finally,  
39  
40  
41 191 we included 9 available studies with adequate data in the meta-analysis (Figure 1). Two  
42  
43  
44 192 studies were included after obtaining the relevant data by contacting the respective authors  
45  
46  
47 193 [9, 10]. In addition, we also verified 2 studies [16, 17] with overlapping study population;  
48  
49  
50 194 of these, only 1 study was included in the meta-analysis. Three studies [6, 8, 18] were  
51  
52  
53 195 presented as meeting abstracts without adequate data to allow the construction of a 2×2  
54  
55  
56 196 table. One article[7] was a letter to the editor and only reported the prevalence rate of

1  
2  
3  
4 197 ASCA antibody in patients with BD, without information about the control group. One  
5  
6  
7 198 study [19] had employed a unique calculation method and could not be included in the  
8  
9  
10 199 meta-analysis. Among the included studies, there were 326 cases of BD, 294 cases of  
11  
12 200 GIBD, 520 cases of CD, 598 cases of UC, 112 cases of iTB, and 428 HCs (Table 1 and  
13  
14  
15 201 supplementary file 4).

16  
17  
18 202

### 21 203 Quality assessment

22  
23  
24  
25 204 There were 8 case-control studies and 1 retrospective study [9]. The results of quality  
26  
27  
28 205 assessment by QUADAS-2 including the risk of bias and applicability concerns pertaining  
29  
30  
31 206 to each domain [20] are shown in supplementary file 5. The results indicated that the  
32  
33  
34 207 included studies were of high quality in general. Overall, none of the 9 included studies  
35  
36  
37 208 showed any major methodological bias or flaws, which indicates robustness of our meta-  
38  
39 209 analysis.

40  
41  
42  
43 210

### 44 45 46 211 Meta-analysis

47  
48  
49  
50 212 Association between ASCA and BD (without gastrointestinal involvement), GIBD and  
51  
52 213 other intestinal diseases

53  
54  
55  
56 214 Data pertaining to correlation between ASCA and BD (without gastrointestinal  
57

1  
2  
3  
4 215 involvement)/GIBD/CD/UC/iTB are listed in Table 2. No substantial heterogeneity  
5  
6  
7 216 ( $p>0.1$  for all) was observed by using REM to calculate the OR. The results revealed a  
8  
9  
10 217 strong association between all detection types of ASCA and GIBD, especially for ASCA-  
11  
12 218 IgG [OR=5.50 (95% CI 2.58–11.55,  $p=0.000$ ) and ASCA-IgG+IgA [OR=5.36 (95% CI  
13  
14  
15 219 1.40–20.45),  $p=0.014$ ]. When comparing GIBD and UC, of the positivity rate for ASCA  
16  
17  
18 220 in GIBD was significantly higher than that for UC: IgA [OR=2.13 (95% CI 1.30–3.50),  
19  
20 221  $p=0.003$ ], IgG+IgA [OR=2.19 (95% CI 1.03–4.66),  $p=0.042$ ], and IgG/IgA [OR=2.03  
21  
22 222 (95% CI 1.30–3.17),  $p=0.002$ ]. Conversely, the frequency of only ASCA-IgG in patients  
23  
24  
25 223 with CD was significantly higher than that in the GIBD [OR=5.36 (95% CI 1.40–20.45),  
26  
27  
28 224  $p=0.009$ ]. Further, on stratified analysis according to detection method, ASCA-IgG was  
29  
30  
31 225 associated with GIBD using both the ELISA method (OR = 3.83, 95% CI 1.37–10.70,  $p$   
32  
33 226 = 0.010) and the immunoprecipitation method (IIF) (OR = 8.17, 95% CI 2.73–24.43,  $p$  =  
34  
35  
36 227 0.000) (Figure 2). However, no significant difference was observed with respect to  
37  
38  
39 228 ASCA positivity between BD without gastrointestinal involvement and HC and between  
40  
41  
42 229 GIBD and iTB ( $p>0.05$ ).

#### 230 Diagnostic ability of ASCA for GIBD

43  
44  
45  
46  
47  
48  
49 231 The overall sensitivity for ASCA-IgG in patients with GIBD detected by IIF was 0.44,  
50  
51  
52 232 which is much higher than that of ELISA [0.20 (95%CI 0.12–0.31)] (Table 3). Combined  
53  
54  
55 233 detection of IgG and IgA by ELISA increased the sensitivity to 0.33 (95% CI 0.23–0.44).

1  
2  
3  
4 234 However, we observed a low level of sensitivity of ASCA-IgG/IgA by IIF, which may be  
5  
6  
7 235 attributable to the inclusion of only one study with few GIBD patients (n=13).  
8  
9

10 236 Difference in serum levels of ASCA in GIBD and other intestinal diseases  
11  
12

13  
14 237 Serum levels of ASCA-IgA observed in GIBD were significantly greater than that in HC  
15  
16 238 [WMD=7.02 (95% CI 2.23–11.81), p=0.004] and UC [WMD=5.28 (95% CI 0.39–10.17),  
17  
18  
19 239 p=0.034] in contrast to ASCA-IgG (p>0.05) (Figure 3). On the contrary, serum levels of  
20  
21  
22 240 ASCA-IgG in CD were significantly greater than that in GIBD [WMD=-11.04 (95% CI -  
23  
24  
25 241 16.74--5.34), p=0.000] (Figure 3). However, we found no significant difference in serum  
26  
27  
28 242 levels of ASCA between BD without gastrointestinal symptoms and HC (p>0.05) (Figure  
29  
30  
31 243 3).  
32  
33

34 244

35  
36  
37 245 Heterogeneity and sensitivity analysis  
38  
39

40  
41 246 We performed sensitivity analysis to assess the stability of the results. The results showed  
42  
43  
44 247 that the studies by Krause et al (2002), Zhang et al (2018), Kocazeybe et al (2010), and  
45  
46 248 Fresko et al (2005) were the key contributors to the heterogeneity (supplementary file 6).  
47  
48  
49 249 Thus, the results of related subgroup analysis are considered to be less stable.  
50  
51

52 250

53  
54  
55  
56 251 Summary of the relationship of ASCA with autoimmune disease  
57  
58

1  
2  
3  
4 252 Sixteen studies reporting the relevance of ASCA and autoimmune diseases were included  
5  
6  
7 253 in the summary. The sensitivity, specificity, LR+, and LR- of ASCA for different  
8  
9  
10 254 autoimmune diseases are summarized in Table 4. Although the diagnostic results of ASCA  
11  
12 255 reported by different studies vary, the summary revealed an overall association between  
13  
14  
15 256 ASCA and autoimmune diseases especially in patients with scleroderma, juvenile  
16  
17 257 idiopathic arthritis, Crohn's disease, and systemic lupus erythematosus with high SEN  
18  
19  
20 258 (>40%), high SPE (>95), high LR+ (>5) (Table 4).  
21  
22  
23  
24 259  
25  
26

## 27 260 **Discussion**

28  
29  
30  
31 261 **Serological markers in BD.** The diagnosis of BD is typically challenging prior to the  
32  
33 262 appearance of clinical symptoms necessary to qualify the diagnostic criteria. Currently,  
34  
35 263 there are no specific laboratory biomarkers of BD; however, some specific autoantibodies  
36  
37 264 in the context of BD have been reported. Therefore, identification of non-invasive specific  
38  
39 265 diagnostic and prognostic biomarkers of BD is of much clinical relevance and a key focus  
40  
41  
42 266 area of research.  
43  
44  
45  
46  
47

48 267 **ASCA in BD and autoimmune diseases.** Several recent studies have investigated the  
49  
50 268 relationship of ASCA with BD or other autoimmune diseases. *Saccharomyces cerevisiae*  
51  
52 269 has long been utilized in alcoholic and baking industry, and for the production of vaccines  
53  
54  
55  
56  
57  
58  
59  
60



1  
2  
3  
4 270 owing to its antigenic component. However, during long-term and ubiquitous presence,  
5  
6  
7 271 even the commensal and classically non-pathogenic microbiota can trigger autoimmunity  
8  
9  
10 272 due to loss of immune tolerance towards the resident bacterial flora, like in gastrointestinal  
11  
12 273 tract [21, 22]. The reported similarity of sequences involving the eukaryotic microorganism  
13  
14  
15 274 and self-antigens suggest a mechanism of molecular mimicry and also the plausibility of  
16  
17  
18 275 shared epitopes in different autoimmune diseases. The production of ASCA by the  
19  
20  
21 276 subsequent activation of the humoral immune response may lead to a direct pathogenic role  
22  
23  
24 277 through a costimulatory CD80/86-CD28-mediated effect [21]. Moreover, healthy family  
25  
26  
27 278 members but not spouses of BD patients were also found to have increased levels of ASCA,  
28  
29  
30 279 which indicated a role of genetic factors in addition to environmental stimuli [17, 22]. A  
31  
32  
33 280 large number of studies have assessed the role of ASCA in the context of several systemic  
34  
35  
36 281 and organ-specific autoimmune diseases, such as BD, scleroderma, systemic lupus  
37  
38  
39 282 erythematosus, primary Sjögren's syndrome, and rheumatoid arthritis (Table 4). The  
40  
41  
42 283 results suggest that the relation of ASCA with BD or other autoimmune diseases may  
43  
44  
45 284 represent a potential pathogenic mechanism between ASCA and autoimmunity; this  
46  
47  
48 285 underlines the importance of ASCA as a valuable serologic marker for autoimmune  
49  
50  
51 286 diseases including BD.

51 287 **Results of the meta-analysis.** To the best of our knowledge, this is the second meta-  
52  
53  
54 288 analysis of evidence pertaining to autoantibodies in patients with BD after anticardiolipin  
55  
56  
57  
58  
59  
60

1  
2  
3  
4 289 antibodies [23]. ASCA have been widely researched in BD, Crohn's disease and other  
5  
6  
7 290 autoimmune disease; in order to investigate the diagnostic value and possible pathogenetic  
8  
9  
10 291 role of ASCA in BD, we included 9 studies in this meta-analysis. Among these, some  
11  
12 292 studies included BD patients with systemic involvement including or excluding  
13  
14  
15 293 gastrointestinal involvement, while others included only BD patients with gastrointestinal  
16  
17  
18 294 involvement. Therefore, in order to reduce the impact of differences with respect to  
19  
20  
21 295 frequency distribution of gastrointestinal symptoms in each study, we disaggregated  
22  
23  
24 296 patients with BD into those with gastrointestinal involvement only and those without  
25  
26  
27 297 gastrointestinal manifestations. The isotype antibodies of ASCA tested and the results  
28  
29  
30 298 presented by the studies are also different. The meta-analysis revealed a strong association  
31  
32  
33 299 of ASCA with GIBD and not with BD with no gastrointestinal involvement; this suggests  
34  
35  
36 300 the role of ASCA in the pathogenesis of gastrointestinal involvement. ASCA showed a  
37  
38  
39 301 moderate diagnostic performance as a biomarker for the differential diagnosis between  
40  
41  
42 302 GIBD and CD, and the negative result of ASCA-IgG may slightly favor the diagnosis of  
43  
44  
45 303 GIBD/BD when compared with CD, especially with concomitant positive HLA-B51 tests  
46  
47  
48 304 [24]. In addition, ASCA-IgA showed a moderate diagnostic value for distinguishing GIBD  
49  
50  
51 305 and UC and would perform better with concomitant detection of IgG. However, ASCA  
52  
53  
54 306 failed to distinguish between GIBD and iTB. Besides, the concomitant evaluation of both  
55  
56  
57 307 continuous data (sensitivity and specificity) and discontinuous data (serum levels) helped  
58  
59  
60 308 increase the credibility of our results.

1  
2  
3  
4 309 **Heterogeneity.** Combined with the results of QUADAS-2, we found that the heterogeneity  
5  
6  
7 310 in this meta-analysis was largely attributable to the following reasons (see Table 1,  
8  
9  
10 311 supplementary file 5). 1) The different diagnostic criteria used in the included studies.  
11  
12 312 Different criteria may have different thresholds for diagnosis or place more weight on some  
13  
14  
15 313 symptoms than others. Specifically, the 1990 ISG criteria requires the presence of oral  
16  
17  
18 314 ulceration plus any two of the following: genital ulceration, typical eye lesions, typical skin  
19  
20  
21 315 lesions, or positive pathergy test for diagnosis of BD [2]. In contrast, the 1987 Japan criteria  
22  
23  
24 316 require all four characteristics for the diagnosis of BD, i.e., oral ulceration, typical eye  
25  
26  
27 317 lesions, typical skin lesions, and genital ulceration [25]. The ISG criteria and the Japanese  
28  
29  
30 318 criteria often fail to classify some patients with BD; in addition, the Japanese criteria may  
31  
32  
33 319 also cause misclassified diagnosis. This may have caused the different diagnostic  
34  
35  
36 320 sensitivity and specificity for BD [26]. 2) Differences in demographic characteristics of  
37  
38  
39 321 included studies. The clinical features and laboratory findings tend to exhibit wide  
40  
41  
42 322 variability in different populations and clinical settings [27, 28]. However, we failed to  
43  
44  
45 323 perform subgroup analysis disaggregated by ethnicity owing to the small sample size in  
46  
47  
48 324 each subgroup. 3) Different antibody assays and cut-off values. Commercial kits and in-  
49  
50  
51 325 house tests from different laboratories have variable performance, which may affect the  
52  
53  
54 326 diagnosis and management of patients. We found that different methods and cut-off values  
55  
56  
57 327 were adopted by the studies included in this meta-analysis. Notably, there was significant  
58  
59  
60 328 association between ASCA-IgG and GIBD using both methods; however, it seems that IIF

1  
2  
3  
4 329 has a higher sensitivity than ELISA. Nonetheless, further investigations with larger study  
5  
6  
7 330 population are required to provide more definitive evidence. Although previous studies  
8  
9  
10 331 have shown that IIF has a better performance, ELISA provides the titer change of serum  
11  
12 332 antibodies and could have an equal performance to IIF by changing cut-off values to  
13  
14  
15 333 optimize the overall diagnostic performance [29]. 4) According to the QUADAS-2, there  
16  
17  
18 334 are certain concerns that most studies have risk of bias (internal validity) in patient  
19  
20  
21 335 selection, which, to some extent, would cause the the distorted estimation in diagnostic  
22  
23  
24 336 accuracy [20].

25  
26 337 **Limitations of the meta-analysis.** In order to fully evaluate the value of ASCA for  
27  
28  
29 338 differential diagnosis of BD, we included patients with CD, UC, and iTB as the comparison  
30  
31  
32 339 objects in our meta-analysis. However, there are some limitations of this meta-analysis. (1)  
33  
34  
35 340 Gray literature database, paper database, and other language databases were not used for  
36  
37  
38 341 the literature search. Quite a few non-English studies were excluded due to incomplete data  
39  
40  
41 342 or unavailability of full text. (2) Our primary goal was to assess the diagnostic efficacy of  
42  
43  
44 343 ASCA in BD, and therefore we did not include all studies pertaining to ASCA in  
45  
46  
47 344 inflammatory bowel disease and iTB. (3) Restricted by the number of included studies and  
48  
49  
50 345 the isotypes of ASCA, we could not perform subgroup analysis disaggregated by different  
51  
52  
53 346 populations and diagnostic criteria. (4) Some studies with incomplete data were excluded  
54  
55  
56 347 after lack of response from the author. (5) There are some inherent statistical shortcomings

1  
2  
3  
4 348 using Meta-DiSc during the separate pooling of sensitivity and specificity, as the between-  
5  
6  
7 349 study variance is not included. More advanced methods are not implemented [30].  
8  
9

10 350 **Conclusion.** Our study demonstrated the relationship between *ASCA/Saccharomyces*  
11  
12  
13 351 *cerevisiae* and gastrointestinal involvement in BD. Furthermore, ASCA may be detectable  
14  
15  
16 352 years before the diagnosis of some autoimmune diseases as they were retrospectively found  
17  
18  
19 353 in the preserved blood samples of soldiers who were affected by Crohn's disease years  
20  
21  
22 354 later [31]. However, detection of only ASCA may have a limited value for clinical  
23  
24  
25 355 diagnosis due to its moderate sensitivity and the presence in several other autoimmune  
26  
27  
28 356 diseases. In the future, further studies are needed to explore the role of ASCA and  
29  
30 357 *Saccharomyces cerevisiae* in BD.  
31

32 358  
33  
34  
35  
36  
37  
38  
39  
40  
41  
42  
43  
44  
45  
46  
47  
48  
49  
50  
51  
52  
53  
54  
55  
56  
57  
58  
59  
60

359 **Compliance with Ethical Standards:**

360 **Contributorship statement:** Study concept and design: Linlin Cheng, Yongzhe Li.  
361 Acquisition of data: Linlin Cheng, Liubing Li, Chenxi Liu, Songxin Yan. Statistical  
362 analysis and interpretation of data: Linlin Cheng, Liubing Li, Chenxi Liu. Drafting of the  
363 manuscript: Linlin Cheng. Revision of manuscript: Yongzhe Li, Linlin Cheng, Liubing Li.  
364 Supervision of work: Yongzhe Li. All authors read and approved the final manuscript.

365 **competing interests:** None.

366 **Funding:** This research was supported by grants from the National Natural Science  
367 Foundation of China Grants (81671618, 81871302), CAMS Innovation Fund for Medical  
368 Sciences (CIFMS) (2017-I2M-3-001, 2017-I2M-B&R-01)

369 **Ethical approval:** This article does not contain any studies with human participants  
370 performed by any of the authors.

371 **Data availability statement:** All data relevant to the study are included in the article or  
372 uploaded as supplementary information.

373

374 **References**

- 375 1. Yazici H., Seyahi E., Hatemi G., Yazici Y. Behcet syndrome: a contemporary view.  
376 Nat Rev Rheumatol. 2018;14:107-19.
- 377 2. Criteria for diagnosis of Behcet's disease. International Study Group for Behcet's  
378 Disease. Lancet. 1990;335:1078-80.
- 379 3. Davatchi F., Assaad-Khalil S., Calamia K.T., Crook J.E., Sadeghi-Abdollahi B.,  
380 Schirmer M., Tzellos T., Zouboulis C.C., Akhlagi M., Al-Dalaan A., Alekberova Z.S.,  
381 Ali A.A., Altenburg A., Arromdee E., Baltaci M., Bastos M., Benamour S., Ben  
382 Ghorbel I., Boyvat A., Carvalho L., Chen W., Ben-Chetrit E., Chams-Davatchi C.,  
383 Correia J. A., Crespo J., Dias C., Dong Y., Paixão-Duarte F., Elmuntaser K., Elonakov  
384 A.V., Graña Gil J., Haghdoost A.-A., Hayani R.M., Houman H., Isayeva A.R.,  
385 Jamshidi A.R., Kaklamanis P., Kumar A., Kyrgidis A., Madanat W., Nadji A., Namba  
386 K., Ohno S., Olivieri I., Vaz Patto J., Pipitone N., De Queiroz M.V., Ramos F.,  
387 Resende C., Rosa C.M., Salvarani C., Serra M.J., Shahram F., Shams H., Sharquie  
388 K.E., Sliti-Khanfir M., Tribolet De Abreu T., Vasconcelos C., Vedes J., Wechsler B.,  
389 Cheng Y.K., Zhang Z., Ziaei N. The International Criteria for Behçet's Disease

- 1  
2  
3 390 (ICBD): a collaborative study of 27 countries on the sensitivity and specificity of the  
4 391 new criteria. *Journal of the European Academy of Dermatology and Venereology*.  
5 392 2014;28:338-47.
- 6  
7 393 4. Alpsy E., Donmez L., Bacanli A., Apaydin C., Butun B. Review of the chronology of  
8 394 clinical manifestations in 60 patients with Behcet's disease. *Dermatology*.  
9 395 2003;207:354-6.
- 10  
11 396 5. Sicard D., Legras J. L. Bread, beer and wine: yeast domestication in the  
12 397 *Saccharomyces sensu stricto* complex. *C R Biol*. 2011;334:229-36.
- 13  
14 398 6. Aslan M., Kocazeybek B., Celik A., Erzin Y., Hatemi I., Hatemi G., Yazici H. Anti-  
15 399 *Saccharomyces cerevisiae* (ASCA) antibody levels in a subgroup of patients with  
16 400 ulcerative colitis, Crohn's disease, GI Behcet, and GI tuberculosis: Correlations with  
17 401 disease duration, activity, and extension. *International Journal of Infectious Diseases*.  
18 402 2010;14:e117-e8.
- 19  
20  
21 403 7. Filik Levent, Biyikoglu Ibrahim. Differentiation of Behcet's disease from  
22 404 inflammatory bowel diseases: Anti-saccharomyces cerevisiae antibody and anti-  
23 405 neutrophilic cytoplasmic antibody. *World Journal of Gastroenterology*. 2008;14:7271.
- 24  
25 406 8. Kocazeybek B., Aslan M., Erzin Y., Celik A., Hatemi I., Hatemi G., Yazici H. Clinical  
26 407 utility of perinuclear antineutrophil cytoplasmic antibodies and anti-*Saccharomyces*  
27 408 *Cerevisiae* antibodies for discriminating specific intestinal inflammations. *International*  
28 409 *Journal of Infectious Diseases*. 2010;14:e118.
- 29  
30  
31 410 9. Zhang Shulan, Luo Jing, Li Ji, Wu Ziyang, Hu Chaojun, Li Ping, Deng Chuiwen, Zhang  
32 411 Fengchun, Qian Jiaming, Li Yongzhe. Retrospective evaluation of the clinical utility of  
33 412 serological biomarkers in Chinese patients with inflammatory bowel disease: 2-year  
34 413 clinical experience. *Clinical Chemistry and Laboratory Medicine (CCLM)*.  
35 414 2017;55:865-75.
- 36  
37 415 10. Zhang Shulan, Luo Jing, Wu Ziyang, Roggenbuck Dirk, Schierack Peter, Reinhold  
38 416 Dirk, Li Ji, Zeng Xiaofeng, Zhang Fengchun, Qian Jiaming, Li Yongzhe. Antibodies  
39 417 against glycoprotein 2 display diagnostic advantages over ASCA in distinguishing CD  
40 418 from intestinal tuberculosis and intestinal Behcet's disease. *Clinical and Translational*  
41 419 *Gastroenterology*. 2018;9:e133.
- 42  
43  
44 420 11. Lidar M., Langevitz P., Barzilai O., Ram M., Porat-Katz B. S., Bizzaro N., Tonutti E.,  
45 421 Maieron R., Chowers Y., Bar-Meir S., Shoenfeld Y. Infectious serologies and  
46 422 autoantibodies in inflammatory bowel disease: insinuations at a true pathogenic role.  
47 423 *Ann N Y Acad Sci*. 2009;1173:640-8.
- 48  
49  
50 424 12. McInnes M. D. F., Moher D., Thombs B. D., McGrath T. A., Bossuyt P. M., Clifford  
51 425 T., Cohen J. F., Deeks J. J., Gatsonis C., Hooft L., Hunt H. A., Hyde C. J., Korevaar D.  
52 426 A., Leeflang M. M. G., Macaskill P., Reitsma J. B., Rodin R., Rutjes A. W. S.,  
53 427 Salameh J. P., Stevens A., Takwoingi Y., Tonelli M., Weeks L., Whiting P., Willis B.  
54 428 H. Preferred Reporting Items for a Systematic Review and Meta-analysis of Diagnostic



- 1  
2  
3  
4 429 Test Accuracy Studies: The PRISMA-DTA Statement. *Jama*. 2018;319:388-96.
- 5 430 13. Stroup D. F., Berlin J. A., Morton S. C., Olkin I., Williamson G. D., Rennie D.,  
6 431 Moher D., Becker B. J., Sipe T. A., Thacker S. B. Meta-analysis of observational  
7 432 studies in epidemiology: a proposal for reporting. *Meta-analysis Of Observational  
8 433 Studies in Epidemiology (MOOSE) group*. *Jama*. 2000;283:2008-12.
- 9  
10 434 14. Liberati A., Altman D. G., Tetzlaff J., Mulrow C., Gotzsche P. C., Ioannidis J. P.,  
11 435 Clarke M., Devereaux P. J., Kleijnen J., Moher D. The PRISMA statement for  
12 436 reporting systematic reviews and meta-analyses of studies that evaluate healthcare  
13 437 interventions: explanation and elaboration. *Bmj*. 2009;339:b2700.
- 14  
15 438 15. Cheung M. W., Ho R. C., Lim Y., Mak A. Conducting a meta-analysis: basics and  
16 439 good practices. *Int J Rheum Dis*. 2012;15:129-35.
- 17  
18 440 16. Krause I., Monselise Y., Milo G., Weinberger A. Anti-Saccharomyces cerevisiae  
19 441 antibodies--a novel serologic marker for Behcet's disease. *Clin Exp Rheumatol*.  
20 442 2002;20:S21-4.
- 21  
22 443 17. Monselise A., Weinberger A., Monselise Y., Fraser A., Sulkes J., Krause I. Anti-  
23 444 Saccharomyces cerevisiae antibodies in Behcet's disease--a familial study. *Clin Exp  
24 445 Rheumatol*. 2006;24:S87-90.
- 25  
26 446 18. Prado L.L., Augusto K.L., Magalhães P.F., Viana V.T., Saad C.G.S., Gonçalves C.R.  
27 447 THU0219 Anti-saccharomyces cerevisiae antibodies (ASCA) in active behçet's  
28 448 disease: A marker of intestinal involvement? *Annals of the Rheumatic Diseases*.  
29 449 2013;71:229-.
- 30  
31 450 19. Oshitani N., Hato F., Jinno Y., Sawa Y., Nakamura S., Matsumoto T., Seki S.,  
32 451 Kitagawa S., Arakawa T. IgG subclasses of anti Saccharomyces cerevisiae antibody in  
33 452 inflammatory bowel disease. *Eur J Clin Invest*. 2001;31:221-5.
- 34  
35 453 20. Whiting P. F., Rutjes A. W., Westwood M. E., Mallett S., Deeks J. J., Reitsma J. B.,  
36 454 Leeflang M. M., Sterne J. A., Bossuyt P. M. QUADAS-2: a revised tool for the quality  
37 455 assessment of diagnostic accuracy studies. *Ann Intern Med*. 2011;155:529-36.
- 38  
39 456 21. Rinaldi M., Perricone R., Blank M., Perricone C., Shoenfeld Y. Anti-Saccharomyces  
40 457 cerevisiae autoantibodies in autoimmune diseases: from bread baking to autoimmunity.  
41 458 *Clin Rev Allergy Immunol*. 2013;45:152-61.
- 42  
43 459 22. Seibold F. ASCA: genetic marker, predictor of disease, or marker of a response to an  
44 460 environmental antigen? *Gut*. 2005;54:1212-3.
- 45  
46 461 23. Zouboulis C. C., Buttner P., Tebbe B., Orfanos C. E. Anticardiolipin antibodies in  
47 462 Adamantiades-Behcet's disease. *Br J Dermatol*. 1993;128:281-4.
- 48  
49 463 24. El-Lateef H. M. A. Behcet disease in pediatrics; a solitary sign can be enough.  
50 464 *Pediatric Rheumatology*. 2019;17.
- 51  
52 465 25. Mizushima Y., Inaba G., Mimura Y., Ono S. Diagnostic criteria for Behçet's disease  
53 466 in 1987, and guideline for treating Behçet's disease1988. 391-3 p.
- 54  
55 467 26. Chang H. K., Lee S. S., Bai H. J., Lee Y. W., Yoon B. Y., Lee C. H., Lee Y. H., Song



- 1  
2  
3  
4 468 G. G., Chung W. T., Lee S. W., Choe J. Y., Kim C. G., Chang D. K. Validation of the  
5 469 classification criteria commonly used in Korea and a modified set of preliminary  
6 470 criteria for Behcet's disease: a multi-center study. *Clin Exp Rheumatol.* 2004;22:S21-6.  
7  
8 471 27. Kramer M., Hasanreisoglu M., Weiss S., Kumova D., Schaap-Fogler M., Guntekin-  
9 472 Ergun S., Ozdek S., Gurelik G., Ergun M. A., Goldenberg-Cohen N., Cohen Y. Single-  
10 473 Nucleotide Polymorphisms in IL23R-IL12RB2 (rs1495965) Are Highly Prevalent in  
11 474 Patients with Behcet's Uveitis, and Vary between Populations. *Ocul Immunol Inflamm.*  
12 475 2018;1-8.  
13  
14 476 28. Fedrigo A., Skare T. L., Bortoluzzi A. L., Nisihara R. ASCA (Anti- *Saccharomyces*  
15 477 *cerevisiae* Antibody) in Patients with Scleroderma. *Journal of Clinical Rheumatology.*  
16 478 2019;25:24-7.  
17  
18 479 29. Holle J. U., Hellmich B., Backes M., Gross W. L., Csernok E. Variations in  
19 480 performance characteristics of commercial enzyme immunoassay kits for detection of  
20 481 antineutrophil cytoplasmic antibodies: what is the optimal cut off? *Ann Rheum Dis.*  
21 482 2005;64:1773-9.  
22  
23 483 30. Wang Junfeng, LeeFlang Mariska. Recommended software/packages for meta-  
24 484 analysis of diagnostic accuracy. *Journal of Laboratory and Precision Medicine.* 2019;4.  
25  
26 485 31. Israeli E., Grotto I., Gilburd B., Balicer R. D., Goldin E., Wiik A., Shoenfeld Y. Anti-  
27 486 *Saccharomyces cerevisiae* and antineutrophil cytoplasmic antibodies as predictors of  
28 487 inflammatory bowel disease. *Gut.* 2005;54:1232-6.  
29  
30 488 32. Zhang Shulan, Luo Jing, Wu Ziyang, Roggenbuck Dirk, Schierack Peter, Reinhold  
31 489 Dirk, Li Ji, Zeng Xiaofeng, Zhang Fengchun, Qian Jiaming, Li Yongzhe. Antibodies  
32 490 against glycoprotein 2 display diagnostic advantages over ASCA in distinguishing CD  
33 491 from intestinal tuberculosis and intestinal Behçet's disease. *Clin Transl Gastroenterol.*  
34 492 2018;9:e133.  
35  
36 493 33. Zhang Shulan, Luo Jing, Li Ji, Wu Ziyang, Hu Chaojun, Li Ping, Deng Chuiwen,  
37 494 Zhang Fengchun, Qian Jiaming, Li Yongzhe. Retrospective evaluation of the clinical  
38 495 utility of serological biomarkers in Chinese patients with inflammatory bowel disease:  
39 496 2-year clinical experience. *Clin Chem Lab Med.* 2017;55:865-75.  
40  
41 497 34. Vaiopoulos G., Lakatos P. L., Papp M., Kaklamanis F., Economou E., Zevgolis V.,  
42 498 Sourdis J., Konstantopoulos K. Serum anti-*Saccharomyces cerevisiae* antibodies in  
43 499 Greek patients with Behcet's disease. *Yonsei Med J.* 2011;52:347-50.  
44  
45 500 35. Kocazeybek B., Aslan M., Erzin Y., Celik A., Hatemi I., Hatemi G., Yazici H.  
46 501 Clinical utility of perinuclear antineutrophil cytoplasmic antibodies and anti-  
47 502 *Saccharomyces Cerevisiae* antibodies for discriminating specific intestinal  
48 503 inflammations. *Int J Infect Dis.* 2010;14:e118.  
49  
50 504 36. Choi C. H., Kim T. I., Kim B. C., Shin S. J., Lee S. K., Kim W. H., Kim H. S. Anti-  
51 505 *Saccharomyces cerevisiae* antibody in intestinal Behcet's disease patients: relation to  
52 506 clinical course. *Dis Colon Rectum.* 2006;49:1849-59.  
53  
54  
55  
56  
57  
58  
59  
60

- 1  
2  
3  
4 507 37. Fresko I., Ugurlu S., Ozbakir F., Celik A., Yurdakul S., Hamuryudan V., Yazici H.  
5 508 Anti-Saccharomyces cerevisiae antibodies (ASCA) in Behcet's syndrome. *Clin Exp*  
6 509 *Rheumatol.* 2005;23:S67-70.
- 7  
8 510 38. Rhee S. H., Kim Y. B., Lee E. S. Comparison of Behcet's disease and recurrent  
9 511 aphthous ulcer according to characteristics of gastrointestinal symptoms. *J Korean*  
10 512 *Med Sci.* 2005;20:971-6.
- 11  
12 513 39. Kim B. G., Kim Y. S., Kim J. S., Jung H. C., Song I. S. Diagnostic role of anti-  
13 514 *Saccharomyces cerevisiae* mannan antibodies combined with antineutrophil  
14 515 cytoplasmic antibodies in patients with inflammatory bowel disease. *Dis Colon*  
15 516 *Rectum.* 2002;45:1062-9.
- 17  
18 517 40. De Vries M., Van Der Horst-Bruinsma I., Van Hoogstraten I., Van Bodegraven A.,  
19 518 Von Blomberg B. M., Ratnawati H., Dijkmans B. pANCA, ASCA, and OmpC  
20 519 antibodies in patients with ankylosing spondylitis without inflammatory bowel disease.  
21 520 *J Rheumatol.* 2010;37:2340-4.
- 22  
23 521 41. Riente L., Chimenti D., Pratesi F., Delle Sedie A., Tommasi S., Tommasi C.,  
24 522 Bombardieri S., Migliorini P. Antibodies to tissue transglutaminase and  
25 523 *Saccharomyces cerevisiae* in ankylosing spondylitis and psoriatic arthritis. *J*  
26 524 *Rheumatol.* 2004;31:920-4.
- 28  
29 525 42. Mundwiler M. L., Mei L., Landers C. J., Reveille J. D., Targan S., Weisman M. H.  
30 526 Inflammatory bowel disease serologies in ankylosing spondylitis patients: a pilot  
31 527 study. *Arthritis Res Ther.* 2009;11:R177.
- 32  
33 528 43. Wallis Dinny, Asaduzzaman Arundip, Weisman Michael, Haroon Nigil, Anton  
34 529 Ammepa, MCGovern Dermot, Targan Stephan, Inman Robert. Elevated serum anti-  
35 530 flagellin antibodies implicate subclinical bowel inflammation in ankylosing  
36 531 spondylitis: an observational study. *Arthritis Research & Therapy.* 2013;15:R166.
- 37  
38 532 44. Krause I., Blank M., Cervera R., Font J., Matthias T., Pfeiffer S., Wies I., Fraser A.,  
39 533 Shoenfeld Y. Cross-reactive epitopes on beta2-glycoprotein-I and *Saccharomyces*  
40 534 *cerevisiae* in patients with the antiphospholipid syndrome. *Ann N Y Acad Sci.*  
41 535 2007;1108:481-8.
- 43  
44 536 45. Gonzalez T., Malagon C., Guarnizo P., Mosquera A. C., Chila-Moreno L., Romero-  
45 537 Sanchez C. Autoantibodies and Gastrointestinal Symptoms in Colombian Children  
46 538 with Juvenile Idiopathic Arthritis. *Curr Rheumatol Rev.* 2018;14:163-71.
- 47  
48 539 46. Muratori P., Muratori L., Guidi M., Maccariello S., Pappas G., Ferrari R., Gionchetti  
49 540 P., Campieri M., Bianchi F. B. Anti-Saccharomyces cerevisiae antibodies (ASCA) and  
50 541 autoimmune liver diseases. *Clin Exp Immunol.* 2003;132:473-6.
- 51  
52 542 47. Czaja A. J., Shums Z., Donaldson P. T., Norman G. L. Frequency and significance of  
53 543 antibodies to *Saccharomyces cerevisiae* in autoimmune hepatitis. *Dig Dis Sci.*  
54 544 2004;49:611-8.
- 55  
56 545 48. Papp M., Norman G. L., Vitalis Z., Tornai I., Altorjay I., Foldi I., Udvardy M., Shums

- 1  
2  
3 546 Z., Dinya T., Orosz P., Lombay B., Jr., Par G., Par A., Veres G., Csak T., Osztoivits J.,  
4 547 Szalay F., Lakatos P. L. Presence of anti-microbial antibodies in liver cirrhosis--a tell-  
5 548 tale sign of compromised immunity? PLoS One. 2010;5:e12957.
- 6  
7 549 49. Sakly W., Jeddi M., Ghedira I. Anti-Saccharomyces cerevisiae antibodies in primary  
8 550 biliary cirrhosis. Dig Dis Sci. 2008;53:1983-7.
- 9  
10 551 50. Main J., Mckenzie H., Yeaman G. R., Kerr M. A., Robson D., Pennington C. R.,  
11 552 Parratt D. Antibody to Saccharomyces cerevisiae (bakers' yeast) in Crohn's disease.  
12 553 Bmj. 1988;297:1105-6.
- 13  
14 554 51. Shor D. B., Orbach H., Boaz M., Altman A., Anaya J. M., Bizzaro N., Tincani A.,  
15 555 Cervera R., Espinosa G., Stojanovich L., Rozman B., Bombardieri S., Vita S. D.,  
16 556 Damoiseaux J., Villalta D., Tonutti E., Tozzoli R., Barzilai O., Ram M., Blank M.,  
17 557 Agmon-Levin N., Shoenfeld Y. Gastrointestinal-associated autoantibodies in different  
18 558 autoimmune diseases. Am J Clin Exp Immunol. 2012;1:49-55.
- 19  
20 559 52. Yazici D., Aydin S. Z., Yavuz D., Tarcin O., Deyneli O., Direskeneli H., Akalin S.  
21 560 Anti-Saccaromyces Cerevisiae antibodies (ASCA) are elevated in autoimmune thyroid  
22 561 disease ASCA in autoimmune thyroid disease. Endocrine. 2010;38:194-8.
- 23  
24 562 53. Mankai A., Thabet Y., Manoubi W., Achour A., Sakly W., Ghedira I. Anti-  
25 563 Saccharomyces cerevisiae antibodies are elevated in Graves' disease but not in  
26 564 Hashimoto's thyroiditis. Endocr Res. 2013;38:98-104.
- 27  
28 565 54. Dai H., Li Z., Zhang Y., Lv P., Gao X. M. Elevated levels of serum IgA against  
29 566 Saccharomyces cerevisiae mannan in patients with rheumatoid arthritis. Cell Mol  
30 567 Immunol. 2009;6:361-6.
- 31  
32 568 55. Dai H., Li Z., Zhang Y., Lv P., Gao X. M. Elevated levels of serum antibodies against  
33 569 Saccharomyces cerevisiae mannan in patients with systemic lupus erythematosus.  
34 570 Lupus. 2009;18:1087-90.
- 35  
36 571 56. Mankai A., Sakly W., Thabet Y., Achour A., Manoubi W., Ghedira I. Anti-  
37 572 Saccharomyces cerevisiae antibodies in patients with systemic lupus erythematosus.  
38 573 Rheumatol Int. 2013;33:665-9.
- 39  
40 574 57. Sakly W., Mankai A., Sakly N., Thabet Y., Achour A., Ghedira-Besbes L., Jeddi M.,  
41 575 Ghedira I. Anti-Saccharomyces cerevisiae antibodies are frequent in type 1 diabetes.  
42 576 Endocr Pathol. 2010;21:108-14.
- 43  
44 577 58. Alunno A., Bistoni O., Carubbi F., Valentini V., Cafaro G., Bartoloni E., Giacomelli  
45 578 R., Gerli R. Prevalence and significance of anti-saccharomyces cerevisiae antibodies in  
46 579 primary Sjogren's syndrome. Clin Exp Rheumatol. 2018;36 Suppl 112:73-9.
- 47  
48  
49  
50 580  
51  
52  
53 581  
54  
55 582  
56  
57  
58  
59  
60

1  
2  
3 584 Figure 1 PRISMA flow diagram illustrating the literature screening process and the  
4 585 criteria for inclusion of studies in the meta-analysis  
5  
6  
7

8 586 Figure 2 Forest plot of the association between the presence of ASCA-IgG and GIBD  
9  
10 587 stratified by detection methods  
11  
12  
13

14 588 Figure 3 Forest plot comparing serum levels of ASCA between BD without  
15  
16 589 gastrointestinal symptom/GIBD and HC/CD/UC  
17  
18  
19

20 590  
21  
22  
23

24 591  
25  
26  
27

28 592  
29  
30  
31

32 593  
33  
34  
35

36 594  
37  
38  
39

40 595  
41  
42  
43

44 596  
45  
46  
47

48 597  
49  
50  
51

52 598  
53  
54  
55

56 599  
57  
58  
59

60 600

1  
2  
3  
4 601 Table 1 Characteristics of studies included in the meta-analysis of Anti-*Saccharomyces*  
5  
6 602 *cerevisiae* antibodies in Behçet's disease, its main differential diagnoses, and healthy  
7  
8  
9 603 controls.  
10  
11

| Year and author             | Count<br>ries | Type                       | Type of article     | Design                 | Sample size |      |     |     |     |     | Methods | Brands of experimental<br>materials        | Cut-off<br>(U/ml)         | Diagnostic<br>criteria |
|-----------------------------|---------------|----------------------------|---------------------|------------------------|-------------|------|-----|-----|-----|-----|---------|--------------------------------------------|---------------------------|------------------------|
|                             |               |                            |                     |                        | BD          | GIBD | CD  | UC  | iTB | HC  |         |                                            |                           |                        |
| 2018 Shulan Zhang [32]      | China         | IgG; IgA; IgG/IgA; IgG+IgA | Original article    | case-control           | /           | 71   | 171 | 208 | 57  | 70  | ELISA   | Inova Diagnostic                           | 25                        | NR                     |
| 2017 Shulan Zhang [33]      | China         | IgG; IgA; IgG/IgA; IgG+IgA | Original article    | Retrospective<br>study | /           | 34   | 128 | 140 | 31  | /   | ELISA   | Euroimmun, Luebeck                         | 20                        | NR                     |
| 2011 George Vaiopoulos [34] | Greece        | IgG; IgA                   | Original article    | case-control           | 58          | 4*   | /   | /   | /   | 56  | ELISA   | Inova Diagnostic                           | NR                        | 1990 ISG criteria      |
| 2010 B. Kocazeybek. [35]    | Turkey        | IgG/IgA                    | conference Abstract | case-control           | /           | 13   | 63  | 102 | 10  | 165 | IIF     | Euroimmun, Luebeck                         | NR                        | NR                     |
| 2006 Chang Hwan Choi [36]   | Korea         | IgG                        | Original article    | case-control           | 30*         | 106  | /   | /   | /   | 45  | IIF     | Euroimmun, Luebeck                         | 1:1000                    | 1987 Japan criteria    |
| 2005 I. Fresko [37]         | Turkey        | IgG; IgA; IgG/IgA; IgG+IgA | Original article    | case-control           | 85          | 8    | 24  | 25  | /   | 21  | ELISA   | Inova Diagnostic                           | 28 for IgG;<br>25 for IgA | 1990 ISG criteria      |
| 2005 Seung-Ho Rhee [38]     | Korea         | IgG                        | Original article    | case-control           | /           | 16   | /   | /   | /   | 4   | ELISA   | Inova Diagnostic                           | 25                        | 1987 Japan criteria    |
| 2002 I. Krause [16]         | Israel        | IgG; IgA; IgG/IgA; IgG+IgA | Original article    | case-control           | 27*         | /    | /   | /   | /   | 10  | ELISA   | Inova Diagnostic                           | 25                        | 1990 ISG criteria      |
| 2002 Byeong Gwan Kim [39]   | Korea         | IgG+IgA+IgM                | Original article    | case-control           | /           | 36   | 85  | 77  | 14  | 20  | ELISA   | plate: Sigma Chemical<br>antibody: Biosoft | ROC curve                 | 1987 Japan criteria    |

604 /:no sample; ELISA: enzyme-linked immunosorbent assay; IIF: indirect immunofluorescence assay; NR: not reported;  
605 SD: standard deviation; \*: all without gastrointestinal manifestations; #: lack of corresponding data; 1990 ISG criteria:  
606 the 1990 criteria of Behçet's Disease International Study Group; 1987 Japan criteria: the 1987 criteria by the Behçet's  
607 Disease Research Committee of Japan; BD: Behçet's disease; GIBD: gastrointestinal Behçet's disease; CD: Crohn's  
608 disease; UC: ulcerative colitis; iTB: intestinal tuberculosis; HC: healthy control

609

610

611

612

613

614 Table 2. Association between the presence of ASCA and BD (without gastrointestinal  
615 symptom)/GIBD and other intestinal diseases

| Subgroup     | Antibody     | Number of studies | Diagnostic OR (95% CI) | Significance test (p) |
|--------------|--------------|-------------------|------------------------|-----------------------|
| BD vs. HC    | ASCA-IgG     | 4                 | 1.00 (0.28–3.53)       | 0.997                 |
|              | ASCA-IgA     | 2                 | 2.50 (0.63–9.96)       | 0.194                 |
|              | ASCA-IgG+IgA | 2                 | 1.06 (0.17–6.78)       | 0.954                 |
|              | ASCA-IgG/IgA | 2                 | 2.88 (0.62–13.44)      | 0.179                 |
| GIBD vs. HC  | ASCA-IgG     | 3                 | 5.50 (2.58–11.55)      | 0.000                 |
|              | ASCA-IgA     | 2                 | 2.65 (1.18–5.96)       | 0.018                 |
|              | ASCA-IgG+IgA | 2                 | 5.36 (1.40–20.45)      | 0.014                 |
|              | ASCA-IgG/IgA | 3                 | 2.90 (1.47–5.74)       | 0.002                 |
| GIBD vs. CD  | ASCA-IgG     | 3                 | 0.48(0.28–0.83)        | 0.009                 |
|              | ASCA-IgA     | 3                 | 0.91(0.56–1.46)        | 0.685                 |
|              | ASCA-IgG+IgA | 3                 | 0.58(0.30–1.11)        | 0.100                 |
|              | ASCA-IgG/IgA | 4                 | 0.57 (0.28–1.15)       | 0.117                 |
| GIBD vs. UC  | ASCA-IgG     | 3                 | 1.78 (0.98–3.22)       | 0.057                 |
|              | ASCA-IgA     | 3                 | 2.13 (1.30–3.50)       | 0.003                 |
|              | ASCA-IgG+IgA | 3                 | 2.19 (1.03–4.66)       | 0.042                 |
|              | ASCA-IgG/IgA | 4                 | 2.03 (1.30–3.17)       | 0.002                 |
| GIBD vs. iTB | ASCA-IgG     | 2                 | 1.08 (0.50–2.32)       | 0.854                 |
|              | ASCA-IgA     | 2                 | 1.51 (0.71–3.22)       | 0.290                 |
|              | ASCA-IgG+IgA | 2                 | 1.02 (0.40–2.62)       | 0.972                 |
|              | ASCA-IgG/IgA | 3                 | 1.05 (0.58–1.87)       | 0.883                 |

616 BD: Behçet's disease without gastrointestinal symptom; GIBD: gastrointestinal Behçet's disease; CD: Crohn's disease;  
617 UC: ulcerative colitis; iTB: intestinal tuberculosis; HC: healthy control

618

619

620

621

622

623 Table 3 Pooled sensitivity and specificity of ASCA-IgG and IgG/IgA for diagnosis of  
 624 GIBD assessed by ELISA and IIF

| Methods      | ELISA                          |                                | IIF         |             |
|--------------|--------------------------------|--------------------------------|-------------|-------------|
|              | Pooled sensitivity<br>(95% CI) | Pooled specificity<br>(95% CI) | Sensitivity | Specificity |
| ASCA-IgG     | 0.20 (0.12–0.31)               | 0.93 (0.86–0.98)               | 0.44        | 0.91        |
| ASCA-IgG/IgA | 0.33 (0.23–0.44)               | 0.85 (0.76–0.91)               | 0.15        | 0.96        |

625 ELISA: enzyme-linked immunosorbent assay; IIF: indirect immunofluorescence assay

626

627

628

629

630

631

632

633

634

635 Table 4 Summary of the diagnostic performance of ASCA in autoimmune disease

| Reference          | Autoimmune disease             | Type    | SEN (%)     | SPE (%)      | LR+        | LR-       | Supplementary information                                                                                                              |
|--------------------|--------------------------------|---------|-------------|--------------|------------|-----------|----------------------------------------------------------------------------------------------------------------------------------------|
| 7                  | Scleroderma                    | IgG     | 43.24       | 98.25        | 24.65      | 0.58      | African descendants showed higher positivity rates for ASCA-IgG. ASCA-IgA was less frequently detected in patients with severe disease |
| 8 [28]             |                                | IgA     | 16.22       | 94.74        | 3.08       | 0.88      |                                                                                                                                        |
| 10, 41, 42, 43     | Ankylosing spondylitis         | IgG     | 0–11.63     | 89.74–98.72  | 1.13–3.00  | 0.97–0.98 | ASCA IgA levels were significantly increased in patients with HLA-B27-associated SpA, particularly in AS and uSpA                      |
| 12                 |                                | IgA     | 1.28–23.26  | 91.03–100.00 | 2.59–3.71  | 0.84–0.99 |                                                                                                                                        |
| 13                 | Antiphospholipid syndrome      | IgG/IgA | 20.00       | 95.00        | /          | /         |                                                                                                                                        |
| 14 [44]            | Juvenile Idiopathic Arthritis  | IgA     | 0–50.00     | 94.74        | 9.50       | 0.53      |                                                                                                                                        |
| 16                 | Autoimmune hepatitis           | IgG     | 16.42–27.53 | 100.00       | /          | 0.84      |                                                                                                                                        |
| 17, 46, 47, 48     |                                | IgA     | 11.94       | 94.74        | 2.27       | 0.93      |                                                                                                                                        |
| 18                 |                                | IgG/IgA | 18.52       | 84.00        | 1.16       | 0.97      |                                                                                                                                        |
| 19                 | Primary biliary cirrhosis      | IgG     | 10.57–18.95 | 97.50–100.00 | 7.58       | 0.83–0.89 |                                                                                                                                        |
| 20, 48, 49         |                                | IgA     | 11.58–18.70 | 94.74–98.75  | 3.55–9.26  | 0.86–0.90 |                                                                                                                                        |
| 21                 |                                | IgG/IgA | 20.26–24.21 | 84.00–96.25  | 1.27–6.46  | 0.79–0.95 |                                                                                                                                        |
| 22                 | Primary sclerosing cholangitis | IgG     | 28.00       | 100.00       | /          | 0.72      |                                                                                                                                        |
| 23, 46, 48         |                                | IgA     | 32.00       | 94.74        | 6.08       | 0.72      |                                                                                                                                        |
| 24                 |                                | IgG/IgA | 30.51       | 84.00        | 1.91       | 0.83      |                                                                                                                                        |
| 25                 | Crohn's disease                | IgG     | 13.75–69.57 | 97.96–100    | 6.74       | 0.30–0.88 | Patients with more complicated disease course showed a trend for greater seroreactivity towards ASCA.                                  |
| 26, 40, 46, 50, 51 |                                | IgA     | 19.30–71.43 | 94.74–100.00 | 9.91–29.40 | 0.50–0.71 |                                                                                                                                        |
| 27                 | Cryoglobulinemia               | IgG     | 7.10        | 99.50        | /          | /         |                                                                                                                                        |
| 28, 52, 53         | Graves' disease                | IgG     | 5.70–12.50  | 94.17–99.50  | 2.15–3.76  | 0.91–0.93 | ASCA was elevated in Graves' disease but not in Hashimoto's thyroiditis                                                                |
| 29                 |                                | IgA     | 8.40–16.67  | 94.17–96.88  | 2.69–2.86  | 0.88–0.95 |                                                                                                                                        |
| 30                 | Rheumatoid arthritis           | IgG     | 10.13–20.00 | 89.74–91.45  | 0.99–2.34  | 0.87–1.00 | ASCA IgA levels strongly correlated with C-reactive protein levels and erythrocyte sedimentation rate                                  |
| 31, 54             |                                | IgA     | 17.72–40.00 | 91.03–94.74  | 1.97–7.60  | 0.63–0.90 |                                                                                                                                        |
| 32                 |                                | IgM     | 13.33       | 94.74        | 2.53       | 0.91      |                                                                                                                                        |
| 33                 | Systemic lupus erythematosus   | IgG     | 4.50–57.50  | 91.45–99.50  | 6.72–9.38  | 0.46–0.73 | ASCA IgG levels in SLE patients during remission were relatively lower, indicating a possible correlation with disease activity        |
| 34, 55, 56         |                                | IgA     | 7.50–12.07  | 94.74–99.38  | 1.43–19.31 | 0.88–0.98 |                                                                                                                                        |
| 35                 |                                | IgG/IgA | 31.90       | 96.25        | 8.51       | 0.71      |                                                                                                                                        |
| 36                 | Type 1 diabetes                | IgG     | 20.98       | 98.09        | 10.98      | 0.81      |                                                                                                                                        |
| 37, 57             |                                | IgA     | 9.82        | 98.73        | 7.71       | 0.91      |                                                                                                                                        |
| 38                 |                                | IgG/IgA | 24.55       | 97.45        | 9.64       | 0.77      |                                                                                                                                        |
| 39                 | Primary Sjögren's syndrome     | IgG/IgA | 4.81        | 100.00       | /          | 0.95      | ASCA positivity was associated with pSS specific clinical and serological features                                                     |
| 40                 | Vasculitides                   | IgG     | 6.50        | 99.50        | /          | /         |                                                                                                                                        |

636 SEN: sensitivity; SPE: specificity; LR+: positive likelihood; LR-: negative likelihood



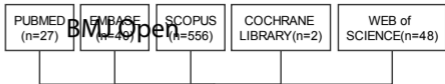

1 Additional records identified through  
2 other sources(n=0)

Records identified through  
database searching(n=625)

3  
4 Records after duplicates  
removed by software(n=574)

5  
6 Records after title and/or  
abstract screening(n=127)

Records excluded by manual  
search and the irrelevant(n=447)

7  
8 Full-text articles assessed for  
eligibility (n=22)

Full-text articles excluded with  
reasons(n=105)

9  
10  
11 Studies included in the  
qualitative synthesis(meta-  
analysis)(n=9)  
12



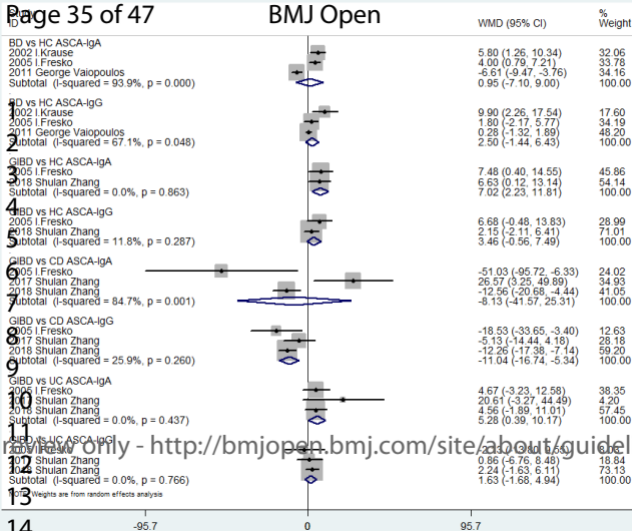

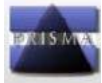

# PRISMA-DTA Checklist

| Section/topic                   | #  | PRISMA-DTA Checklist Item                                                                                                                                                                                                                                                                                                                                     | Reported on page #  |
|---------------------------------|----|---------------------------------------------------------------------------------------------------------------------------------------------------------------------------------------------------------------------------------------------------------------------------------------------------------------------------------------------------------------|---------------------|
| <b>TITLE / ABSTRACT</b>         |    |                                                                                                                                                                                                                                                                                                                                                               |                     |
| Title                           | 1  | Identify the report as a systematic review (+/- meta-analysis) of diagnostic test accuracy (DTA) studies.                                                                                                                                                                                                                                                     | 1                   |
| Abstract                        | 2  | Abstract: See PRISMA-DTA for abstracts.                                                                                                                                                                                                                                                                                                                       | 1                   |
| <b>INTRODUCTION</b>             |    |                                                                                                                                                                                                                                                                                                                                                               |                     |
| Rationale                       | 3  | Describe the rationale for the review in the context of what is already known.                                                                                                                                                                                                                                                                                | 4                   |
| Clinical role of index test     | D1 | State the scientific and clinical background, including the intended use and clinical role of the index test, and if applicable, the rationale for minimally acceptable test accuracy (or minimum difference in accuracy for comparative design).                                                                                                             | 4, 5                |
| Objectives                      | 4  | Provide an explicit statement of question(s) being addressed in terms of participants, index test(s), and target condition(s).                                                                                                                                                                                                                                | 4, 5                |
| <b>METHODS</b>                  |    |                                                                                                                                                                                                                                                                                                                                                               |                     |
| Protocol and registration       | 5  | Indicate if a review protocol exists, if and where it can be accessed (e.g., Web address), and, if available, provide registration information including registration number.                                                                                                                                                                                 | 5<br>CRD42020115245 |
| Eligibility criteria            | 6  | Specify study characteristics (participants, setting, index test(s), reference standard(s), target condition(s), and study design) and report characteristics (e.g., years considered, language, publication status) used as criteria for eligibility, giving rationale.                                                                                      | 6, 7                |
| Information sources             | 7  | Describe all information sources (e.g., databases with dates of coverage, contact with study authors to identify additional studies) in the search and date last searched.                                                                                                                                                                                    | 6, 7                |
| Search                          | 8  | Present full search strategies for all electronic databases and other sources searched, including any limits used, such that they could be repeated.                                                                                                                                                                                                          | 6                   |
| Study selection                 | 9  | State the process for selecting studies (i.e., screening, eligibility, included in systematic review, and, if applicable, included in the meta-analysis).                                                                                                                                                                                                     | 6                   |
| Data collection process         | 10 | Describe method of data extraction from reports (e.g., piloted forms, independently, in duplicate) and any processes for obtaining and confirming data from investigators.                                                                                                                                                                                    | 7                   |
| Definitions for data extraction | 11 | Provide definitions used in data extraction and classifications of target condition(s), index test(s), reference standard(s) and other characteristics (e.g. study design, clinical setting).                                                                                                                                                                 | 7                   |
| Risk of bias and applicability  | 12 | Describe methods used for assessing risk of bias in individual studies and concerns regarding the applicability to the review question.                                                                                                                                                                                                                       | 7                   |
| Diagnostic accuracy measures    | 13 | State the principal diagnostic accuracy measure(s) reported (e.g. sensitivity, specificity) and state the unit of assessment (e.g. per-patient, per-lesion).                                                                                                                                                                                                  | 7, 8                |
| Synthesis of results            | 14 | Describe methods of handling data, combining results of studies and describing variability between studies. This could include, but is not limited to: a) handling of multiple definitions of target condition. b) handling of multiple thresholds of test positivity, c) handling multiple index test readers, d) handling of indeterminate test results, e) | 7, 8                |

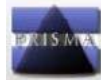

# PRISMA-DTA Checklist

grouping and comparing tests, f) handling of different reference standards

Page 1 of 2

| Section/topic                  | #  | PRISMA-DTA Checklist Item                                                                                                                                                                                                                                                                         | Reported on page # |
|--------------------------------|----|---------------------------------------------------------------------------------------------------------------------------------------------------------------------------------------------------------------------------------------------------------------------------------------------------|--------------------|
| Meta-analysis                  | D2 | Report the statistical methods used for meta-analyses, if performed.                                                                                                                                                                                                                              | 7, 8               |
| Additional analyses            | 16 | Describe methods of additional analyses (e.g., sensitivity or subgroup analyses, meta-regression), if done, indicating which were pre-specified.                                                                                                                                                  | 7-9                |
| <b>RESULTS</b>                 |    |                                                                                                                                                                                                                                                                                                   |                    |
| Study selection                | 17 | Provide numbers of studies screened, assessed for eligibility, included in the review (and included in meta-analysis, if applicable) with reasons for exclusions at each stage, ideally with a flow diagram.                                                                                      | 9, 10              |
| Study characteristics          | 18 | For each included study provide citations and present key characteristics including: a) participant characteristics (presentation, prior testing), b) clinical setting, c) study design, d) target condition definition, e) index test, f) reference standard, g) sample size, h) funding sources | 9, 10              |
| Risk of bias and applicability | 19 | Present evaluation of risk of bias and concerns regarding applicability for each study.                                                                                                                                                                                                           | 10                 |
| Results of individual studies  | 20 | For each analysis in each study (e.g. unique combination of index test, reference standard, and positivity threshold) report 2x2 data (TP, FP, FN, TN) with estimates of diagnostic accuracy and confidence intervals, ideally with a forest or receiver operator characteristic (ROC) plot.      | 10                 |
| Synthesis of results           | 21 | Describe test accuracy, including variability; if meta-analysis was done, include results and confidence intervals.                                                                                                                                                                               | 10-12              |
| Additional analysis            | 23 | Give results of additional analyses, if done (e.g., sensitivity or subgroup analyses, meta-regression; analysis of index test: failure rates, proportion of inconclusive results, adverse events).                                                                                                | 12                 |
| <b>DISCUSSION</b>              |    |                                                                                                                                                                                                                                                                                                   |                    |
| Summary of evidence            | 24 | Summarize the main findings including the strength of evidence.                                                                                                                                                                                                                                   | 14                 |
| Limitations                    | 25 | Discuss limitations from included studies (e.g. risk of bias and concerns regarding applicability) and from the review process (e.g. incomplete retrieval of identified research).                                                                                                                | 16, 17             |
| Conclusions                    | 26 | Provide a general interpretation of the results in the context of other evidence. Discuss implications for future research and clinical practice (e.g. the intended use and clinical role of the index test).                                                                                     | 17                 |
| <b>FUNDING</b>                 |    |                                                                                                                                                                                                                                                                                                   |                    |
| Funding                        | 27 | For the systematic review, describe the sources of funding and other support and the role of the funders.                                                                                                                                                                                         | 18                 |

Adapted From: McInnes MDF, Moher D, Thoms BD, McGrath TA, Bossuyt PM, The PRISMA-DTA Group (2018). Preferred Reporting Items for a Systematic Review and Meta-analysis of Diagnostic Test Accuracy Studies: The PRISMA-DTA Statement. JAMA. 2018 Jan 23;319(4):388-396. doi: 10.1001/jama.2017.19163.

For more information, visit: [www.prisma-statement.org](http://www.prisma-statement.org).

# Reporting checklist for meta-analysis of observational studies.

Based on the MOOSE guidelines.

## Instructions to authors

Complete this checklist by entering the page numbers from your manuscript where readers will find each of the items listed below.

Your article may not currently address all the items on the checklist. Please modify your text to include the missing information. If you are certain that an item does not apply, please write "n/a" and provide a short explanation.

Upload your completed checklist as an extra file when you submit to a journal.

In your methods section, say that you used the MOOSE reporting guidelines, and cite them as:

Stroup DF, Berlin JA, Morton SC, Olkin I, Williamson GD, Rennie D, Moher D, Becker BJ, Sipe TA, Thacker SB. Meta-analysis of observational studies in epidemiology: a proposal for reporting. Meta-analysis Of Observational Studies in Epidemiology (MOOSE) group. JAMA. 2000; 283(15):2008-2012.

|                   | Reporting Item                                                                                                                                                                                                                                                                                                                                        | Page Number |
|-------------------|-------------------------------------------------------------------------------------------------------------------------------------------------------------------------------------------------------------------------------------------------------------------------------------------------------------------------------------------------------|-------------|
| <b>Title</b>      |                                                                                                                                                                                                                                                                                                                                                       |             |
|                   | <a href="#">#1</a> Identify the study as a meta-analysis of observational research                                                                                                                                                                                                                                                                    | 1           |
| <b>Abstract</b>   |                                                                                                                                                                                                                                                                                                                                                       |             |
|                   | <a href="#">#2</a> Provide a structured summary including, as applicable: background; objectives; data sources; study eligibility criteria, participants, and interventions; study appraisal and synthesis methods; results; limitations; conclusions and implications of key findings; systematic review registration number (From PRISMA checklist) | 1-2         |
| <b>Background</b> |                                                                                                                                                                                                                                                                                                                                                       |             |
|                   | <a href="#">#3a</a> Problem definition                                                                                                                                                                                                                                                                                                                | 4           |

|    |                |                     |                                                            |                       |
|----|----------------|---------------------|------------------------------------------------------------|-----------------------|
| 1  |                | <a href="#">#3b</a> | Hypothesis statement                                       | 4-5                   |
| 2  |                |                     |                                                            |                       |
| 3  |                | <a href="#">#3c</a> | Description of study outcomes                              | n/a                   |
| 4  |                |                     |                                                            |                       |
| 5  |                |                     |                                                            |                       |
| 6  |                |                     |                                                            | The study outcomes    |
| 7  |                |                     |                                                            | were reported in the  |
| 8  |                |                     |                                                            | section of Results an |
| 9  |                |                     |                                                            | d Discussion.         |
| 10 |                |                     |                                                            |                       |
| 11 |                | <a href="#">#3d</a> | Type of exposure or intervention used                      | 4                     |
| 12 |                |                     |                                                            |                       |
| 13 |                | <a href="#">#3e</a> | Type of study designs used                                 | 4                     |
| 14 |                |                     |                                                            |                       |
| 15 |                | <a href="#">#3f</a> | Study population                                           | 4, 5                  |
| 16 |                |                     |                                                            |                       |
| 17 |                |                     |                                                            |                       |
| 18 |                |                     |                                                            |                       |
| 19 | <b>Methods</b> |                     |                                                            |                       |
| 20 |                |                     |                                                            |                       |
| 21 |                |                     |                                                            |                       |
| 22 | Search         | <a href="#">#4a</a> | Qualifications of searchers (eg, librarians and            | 6, 7                  |
| 23 | strategy       |                     | investigators)                                             |                       |
| 24 |                |                     |                                                            |                       |
| 25 |                |                     |                                                            |                       |
| 26 | Search         | <a href="#">#4b</a> | Search strategy, including time period included in the     | 5, 6                  |
| 27 | strategy       |                     | synthesis and keywords                                     |                       |
| 28 |                |                     |                                                            |                       |
| 29 |                |                     |                                                            |                       |
| 30 | Search         | <a href="#">#4c</a> | Effort to include all available studies, including contact | 7                     |
| 31 | strategy       |                     | with authors                                               |                       |
| 32 |                |                     |                                                            |                       |
| 33 |                |                     |                                                            |                       |
| 34 | Search         | <a href="#">#4d</a> | Databases and registries searched                          | 5, 6                  |
| 35 | strategy       |                     |                                                            |                       |
| 36 |                |                     |                                                            |                       |
| 37 | Search         | <a href="#">#4e</a> | Search software used, name and version, including          | n/a                   |
| 38 | strategy       |                     | special features used (eg, explosion)                      |                       |
| 39 |                |                     |                                                            | The search was perf   |
| 40 |                |                     |                                                            | ormed on website of   |
| 41 |                |                     |                                                            | databases             |
| 42 |                |                     |                                                            |                       |
| 43 |                |                     |                                                            |                       |
| 44 |                |                     |                                                            |                       |
| 45 | Search         | <a href="#">#4f</a> | Use of hand searching (eg, reference lists of obtained     | 6                     |
| 46 | strategy       |                     | articles)                                                  |                       |
| 47 |                |                     |                                                            |                       |
| 48 |                |                     |                                                            |                       |
| 49 | Search         | <a href="#">#4g</a> | List of citations located and those excluded, including    | 6, 7                  |
| 50 | strategy       |                     | justification                                              |                       |
| 51 |                |                     |                                                            |                       |
| 52 |                |                     |                                                            |                       |
| 53 | Search         | <a href="#">#4h</a> | Method of addressing articles published in languages       | 6                     |
| 54 | strategy       |                     | other than English                                         |                       |
| 55 |                |                     |                                                            |                       |
| 56 | Search         | <a href="#">#4i</a> | Method of handling abstracts and unpublished studies       | 6                     |
| 57 | strategy       |                     |                                                            |                       |
| 58 |                |                     |                                                            |                       |
| 59 |                |                     |                                                            |                       |
| 60 |                |                     |                                                            |                       |

|    |                |                     |                                                             |       |
|----|----------------|---------------------|-------------------------------------------------------------|-------|
| 1  | Search         | <a href="#">#4j</a> | Description of any contact with authors                     | 7     |
| 2  | strategy       |                     |                                                             |       |
| 3  |                |                     |                                                             |       |
| 4  |                |                     |                                                             |       |
| 5  |                | <a href="#">#5a</a> | Description of relevance or appropriateness of studies      | 7     |
| 6  |                |                     | gathered for assessing the hypothesis to be tested          |       |
| 7  |                |                     |                                                             |       |
| 8  |                |                     |                                                             |       |
| 9  |                | <a href="#">#5b</a> | Rationale for the selection and coding of data (eg,         | 7     |
| 10 |                |                     | sound clinical principles or convenience)                   |       |
| 11 |                |                     |                                                             |       |
| 12 |                | <a href="#">#5c</a> | Documentation of how data were classified and coded         | 7     |
| 13 |                |                     | (eg, multiple raters, blinding, and interrater reliability) |       |
| 14 |                |                     |                                                             |       |
| 15 |                |                     |                                                             |       |
| 16 |                | <a href="#">#5d</a> | Assessment of confounding (eg, comparability of cases       | 7     |
| 17 |                |                     | and controls in studies where appropriate)                  |       |
| 18 |                |                     |                                                             |       |
| 19 |                |                     |                                                             |       |
| 20 |                | <a href="#">#5e</a> | Assessment of study quality, including blinding of quality  | 7     |
| 21 |                |                     | assessors; stratification or regression on possible         |       |
| 22 |                |                     | predictors of study results                                 |       |
| 23 |                |                     |                                                             |       |
| 24 |                |                     |                                                             |       |
| 25 |                | <a href="#">#5f</a> | Assessment of heterogeneity                                 | 8     |
| 26 |                |                     |                                                             |       |
| 27 |                |                     |                                                             |       |
| 28 |                | <a href="#">#5g</a> | Description of statistical methods (eg, complete            | 8     |
| 29 |                |                     | description of fixed or random effects models,              |       |
| 30 |                |                     | justification of whether the chosen models account for      |       |
| 31 |                |                     | predictors of study results, dose-response models, or       |       |
| 32 |                |                     | cumulative meta-analysis) in sufficient detail to be        |       |
| 33 |                |                     | replicated                                                  |       |
| 34 |                |                     |                                                             |       |
| 35 |                |                     |                                                             |       |
| 36 |                |                     |                                                             |       |
| 37 |                | <a href="#">#5h</a> | Provision of appropriate tables and graphics                | n/a   |
| 38 |                |                     |                                                             |       |
| 39 |                |                     |                                                             |       |
| 40 |                |                     |                                                             |       |
| 41 |                |                     |                                                             |       |
| 42 |                |                     |                                                             |       |
| 43 |                |                     |                                                             |       |
| 44 |                |                     |                                                             |       |
| 45 |                |                     |                                                             |       |
| 46 |                |                     |                                                             |       |
| 47 | <b>Results</b> |                     |                                                             |       |
| 48 |                |                     |                                                             |       |
| 49 |                | <a href="#">#6a</a> | Graphic summarizing individual study estimates and          | 10-12 |
| 50 |                |                     | overall estimate                                            |       |
| 51 |                |                     |                                                             |       |
| 52 |                |                     |                                                             |       |
| 53 |                | <a href="#">#6b</a> | Table giving descriptive information for each study         | 9, 10 |
| 54 |                |                     | included                                                    |       |
| 55 |                |                     |                                                             |       |
| 56 |                |                     |                                                             |       |
| 57 |                | <a href="#">#6c</a> | Results of sensitivity testing (eg, subgroup analysis)      | 12    |
| 58 |                |                     |                                                             |       |
| 59 |                |                     |                                                             |       |
| 60 |                |                     |                                                             |       |

The methods were described in text instead of tables and graphics.



|    |                     |                                                            |                    |
|----|---------------------|------------------------------------------------------------|--------------------|
| 1  | <a href="#">#6d</a> | Indication of statistical uncertainty of findings          | 12                 |
| 2  |                     |                                                            |                    |
| 3  | <b>Discussion</b>   |                                                            |                    |
| 4  |                     |                                                            |                    |
| 5  |                     |                                                            |                    |
| 6  | <a href="#">#7a</a> | Quantitative assessment of bias (eg. publication bias)     | n/a                |
| 7  |                     |                                                            |                    |
| 8  |                     |                                                            | Small number of    |
| 9  |                     |                                                            | studies in each    |
| 10 |                     |                                                            | subgroup prevented |
| 11 |                     |                                                            | publication bias   |
| 12 |                     |                                                            | analysis           |
| 13 |                     |                                                            |                    |
| 14 |                     |                                                            |                    |
| 15 |                     |                                                            |                    |
| 16 | <a href="#">#7b</a> | Justification for exclusion (eg, exclusion of non–English- | 16                 |
| 17 |                     | language citations)                                        |                    |
| 18 |                     |                                                            |                    |
| 19 |                     |                                                            |                    |
| 20 | <a href="#">#7c</a> | Assessment of quality of included studies                  | 15, 16             |
| 21 |                     |                                                            |                    |
| 22 | <b>Conclusion</b>   |                                                            |                    |
| 23 |                     |                                                            |                    |
| 24 |                     |                                                            |                    |
| 25 | <a href="#">#8a</a> | Consideration of alternative explanations for observed     | 17                 |
| 26 |                     | results                                                    |                    |
| 27 |                     |                                                            |                    |
| 28 |                     |                                                            |                    |
| 29 | <a href="#">#8b</a> | Generalization of the conclusions (ie, appropriate for the | 17                 |
| 30 |                     | data presented and within the domain of the literature     |                    |
| 31 |                     | review)                                                    |                    |
| 32 |                     |                                                            |                    |
| 33 |                     |                                                            |                    |
| 34 | <a href="#">#8c</a> | Guidelines for future research                             | 17                 |
| 35 |                     |                                                            |                    |
| 36 | <a href="#">#8d</a> | Disclosure of funding source                               | 18                 |
| 37 |                     |                                                            |                    |

Reproduced with permission from JAMA. 2000. 283(15):2008-2012. Copyright © 2000 American Medical Association. All rights reserved. This checklist was completed on 26. August 2019 using <https://www.goodreports.org/>, a tool made by the [EQUATOR Network](#) in collaboration with [Penelope.ai](#)

### Supplementary file 3 The full search strategy for EMBASE

#1 yeast?, AND baker? OR (baker? AND yeast?) OR (yeast?, AND brewer?) OR (brewer? AND yeast?) OR (s AND cerevisiae) OR (s. AND cerevisiae) OR (saccharomyces AND cerevisiae) OR (saccharomyces AND capensis) OR (saccharomyces AND cerevisia) OR (saccharomyces AND cerevisiae) OR (saccharomyces AND cerevisial) OR (saccharomyces AND cervisiae) OR (saccharomyces AND diastaticus) OR (saccharomyces AND italicus) OR (saccharomyces AND oviformis) OR (saccharomyces AND uvarum AND var. AND melibiosus) OR asca

#2 behcet? OR ('triple symptom' AND complex) OR (triple AND symptom AND complex) OR (complex, AND triple AND symptom) OR (complices, AND triple AND symptom) OR (symptom AND complex, AND triple) OR (symptom AND complices, AND triple) OR (triple AND symptom AND complices) OR 'adamantiades behcet' OR (old AND silk AND route AND disease) OR behçet

#3 #1 AND #2

Supplementary file 4 Demographic characteristics of patients and healthy controls included in the  
meta-analysis

BD: Behçet's disease; GIBD: gastrointestinal Behçet's disease; CD: Crohn's disease; UC: ulcerative colitis; iTB: intestinal tuberculosis; HC: healthy control; /: No such group included; Blank: no such information in the article

|                                       | <b>BD</b>        | <b>GIBD</b>      | <b>CD</b>           | <b>UC</b>           | <b>iTB</b> | <b>HC</b>           |
|---------------------------------------|------------------|------------------|---------------------|---------------------|------------|---------------------|
| <b>Female, n (%)</b>                  |                  |                  |                     |                     |            |                     |
| 2018 Shulan Zhang                     | /                |                  |                     |                     |            | /                   |
| 2017 Shulan Zhang                     |                  |                  | 37 (28.9)           | 69 (49.3)           |            |                     |
| 2011 George Vaiopoulos                | 28 (48.3)        | /                | /                   | /                   | /          |                     |
| 2010 B. Kocazeybek                    | /                | 5 (38.5)         | 39 (61.9)           | 51 (50.0)           | 3 (30.0)   | 99 (60.0)           |
| 2006 Chang Hwan Choi                  | 16 (86.6)        | 47 (44.3)        | /                   | /                   | /          | 24 (53.3)           |
| 2005 I. Fresko                        | 20 (23.5)        | 2 (25.0)         | 10 (41.7)           | 10 (40.0)           | /          | 9 (42.9)            |
| 2005 Seung-Ho Rhee                    | /                | 28 (63.6)        | /                   | /                   | /          |                     |
| 2002 I. Krause                        | 20 (74.1)        |                  |                     |                     |            |                     |
| 2002 Byeong Gwan Kim                  | /                | 20               | 28                  | 36                  | 7          |                     |
| <b>Median age at study (max, min)</b> |                  |                  |                     |                     |            |                     |
| 2018 Shulan Zhang                     | /                |                  |                     |                     |            |                     |
| 2017 Shulan Zhang                     | /                |                  | 33 (69,13)          | 42 (76,13)          |            | /                   |
| 2011 George Vaiopoulos                | 38.5 (17,70)     | /                | /                   | /                   | /          |                     |
| 2010 B. Kocazeybek                    | /                | 32.11 (23.22,41) | 37.56 (24.91,50.21) | 40.72 (27.28,54.16) | SD 9.96    | 35.07 (24.58,45.56) |
| 2006 Chang Hwan Choi                  | 38 (18,65)       | 37               | /                   | /                   | /          | 39 (16,69)          |
| 2005 I. Fresko                        | 34.3 (32.0,36.7) | 26.9 (24.1,29.6) | 38.9 (34.6,43.2)    | 35.6 (33.0,38.3)    | /          | 33.7 (30.4,37.0)    |
| 2005 Seung-Ho Rhee                    | /                | 37.6             | /                   | /                   | /          |                     |
| 2002 I. Krause                        | 41.6 (36.9,46.2) |                  |                     |                     |            |                     |
| 2002 Byeong Gwan Kim                  | /                | 43.2             | 40.9                | 30.6                | 33.6       |                     |

Supplementary file 5 Results of quality assessment of the included studies based on the QUADAS-1 tool

|                        | <u>Risk of Bias</u> |            |                    |                 | <u>Applicability Concerns</u> |            |                    |
|------------------------|---------------------|------------|--------------------|-----------------|-------------------------------|------------|--------------------|
|                        | Patient Selection   | Index Test | Reference Standard | Flow and Timing | Patient Selection             | Index Test | Reference Standard |
| 2002 Byeong Gwan Kim   | -                   | ?          | +                  | +               | +                             | +          | +                  |
| 2002 I. Krause         | -                   | +          | +                  | +               | +                             | +          | +                  |
| 2005 I. Fresko         | -                   | ?          | +                  | +               | +                             | ?          | +                  |
| 2005 Seung Ho Rhee     | -                   | -          | +                  | ?               | +                             | +          | ?                  |
| 2006 Chang Hwan Choi   | -                   | +          | +                  | +               | ?                             | +          | +                  |
| 2010 B. Kocazeybe      | -                   | ?          | ?                  | ?               | ?                             | ?          | ?                  |
| 2011 George Vaiopoulos | -                   | ?          | +                  | +               | ?                             | ?          | +                  |
| 2017 Shulan Zhang      | +                   | ?          | -                  | ?               | ?                             | ?          | +                  |
| 2018 Shulan Zhang      | -                   | +          | +                  | +               | +                             | +          | +                  |

- High     
 ? Unclear     
 + Low

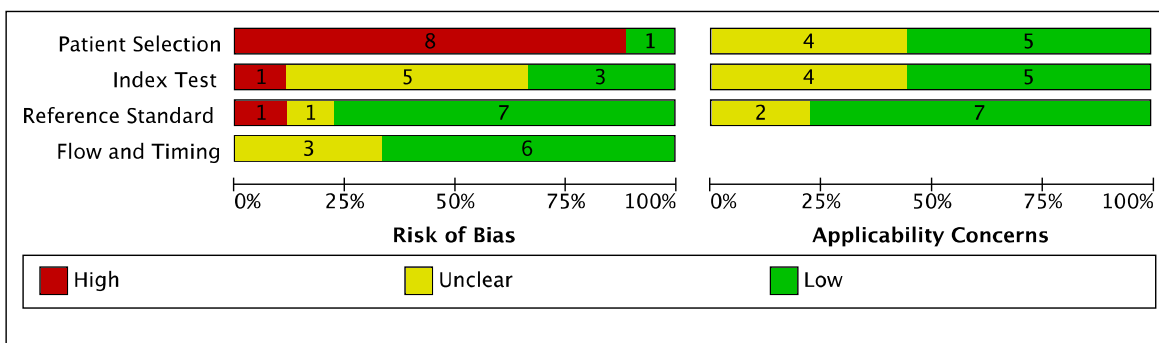

1  
2  
3  
4  
5  
6  
7  
8  
9  
10  
11  
12  
13  
14  
15  
16  
17  
18  
19  
20  
21  
22  
23  
24  
25  
26  
27  
28  
29  
30  
31  
32  
33  
34  
35  
36  
37  
38  
39  
40  
41  
42  
43  
44  
45  
46  
47  
48  
49  
50  
51  
52  
53  
54  
55  
56  
57  
58  
59  
60

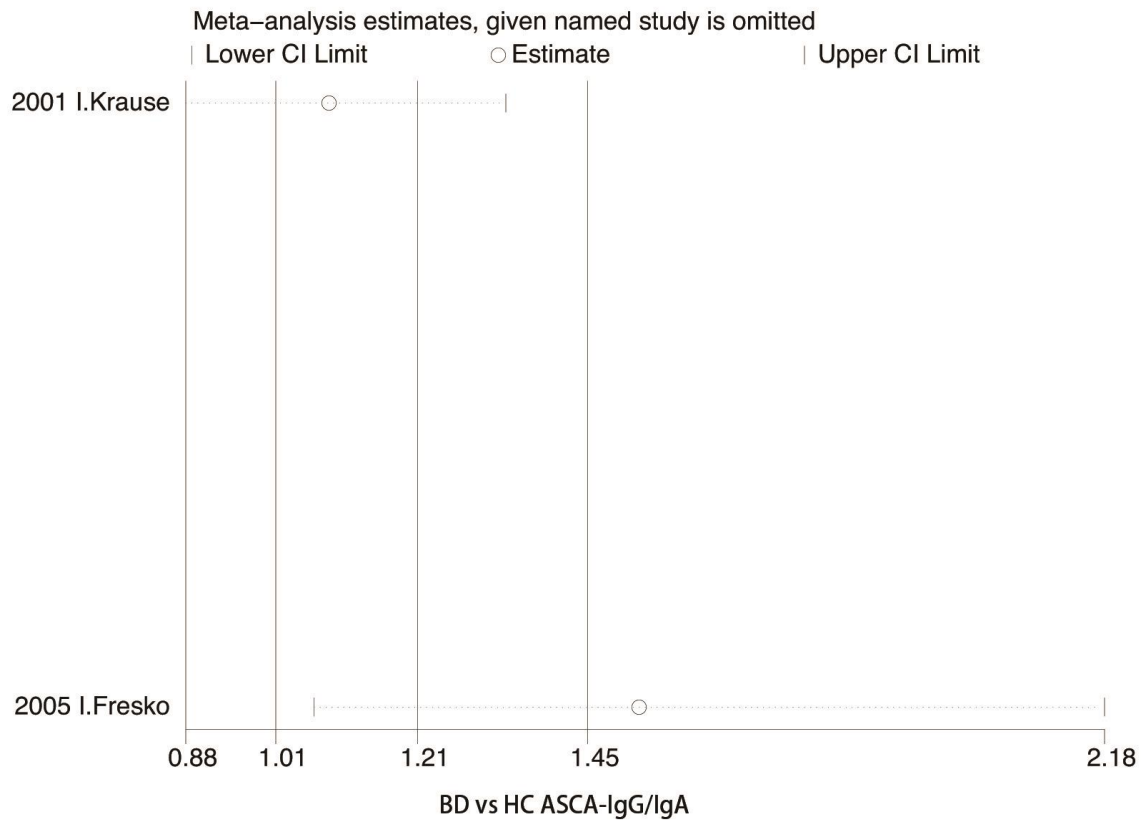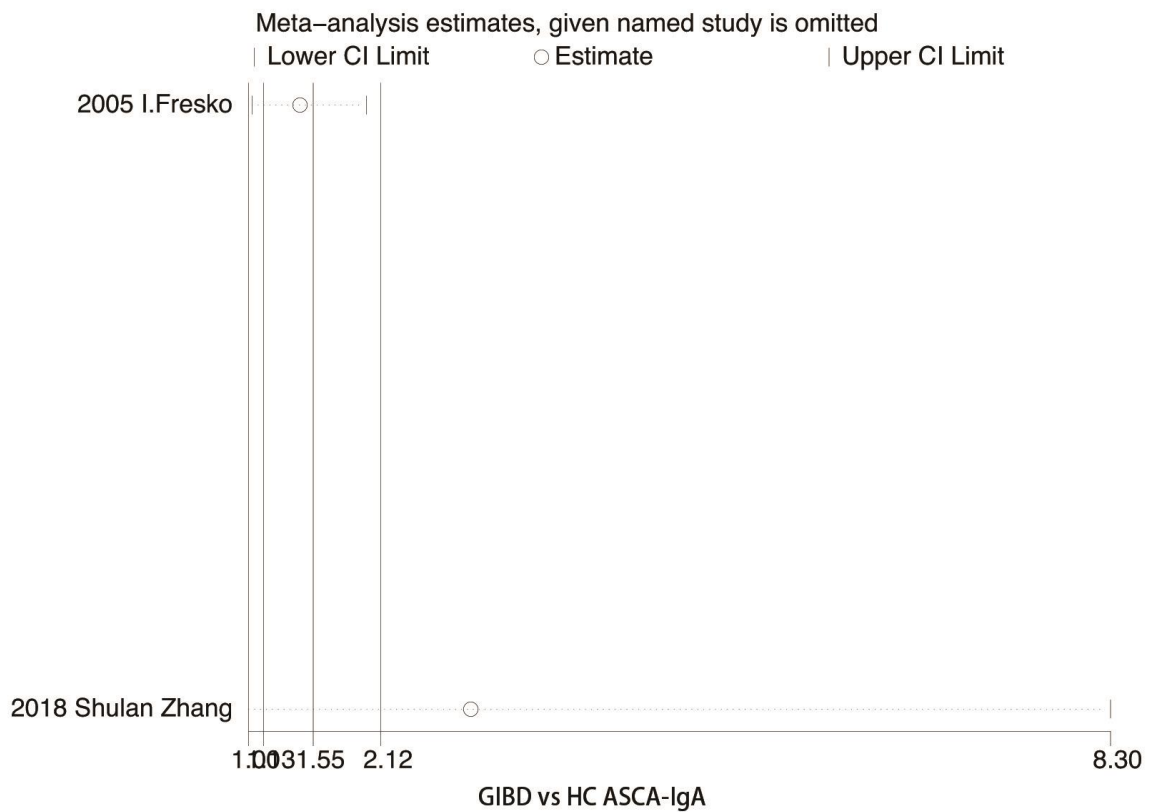

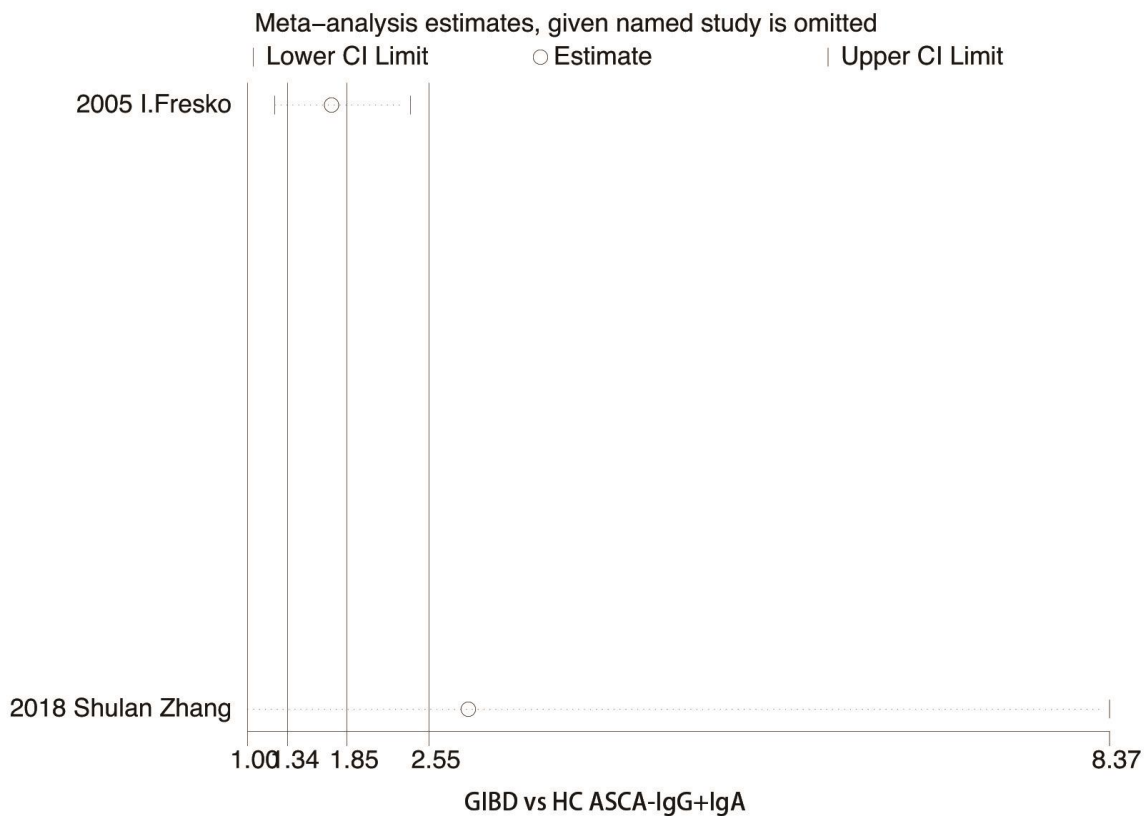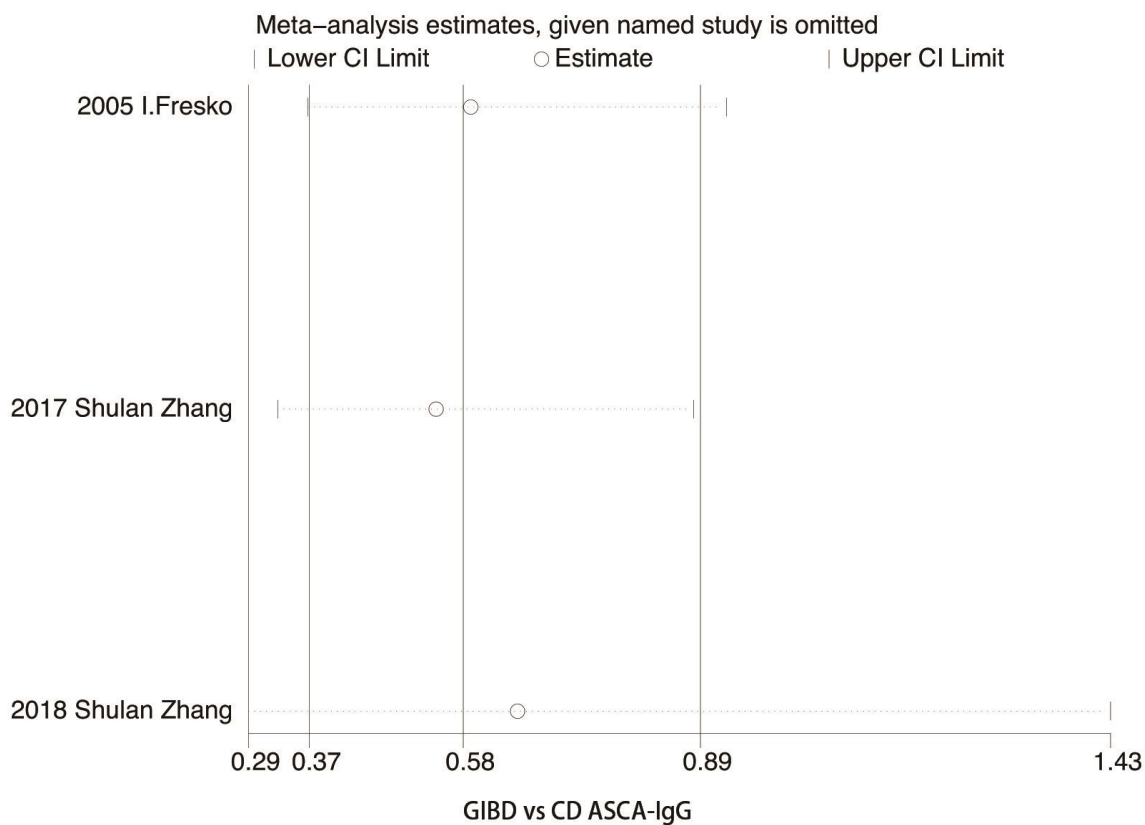

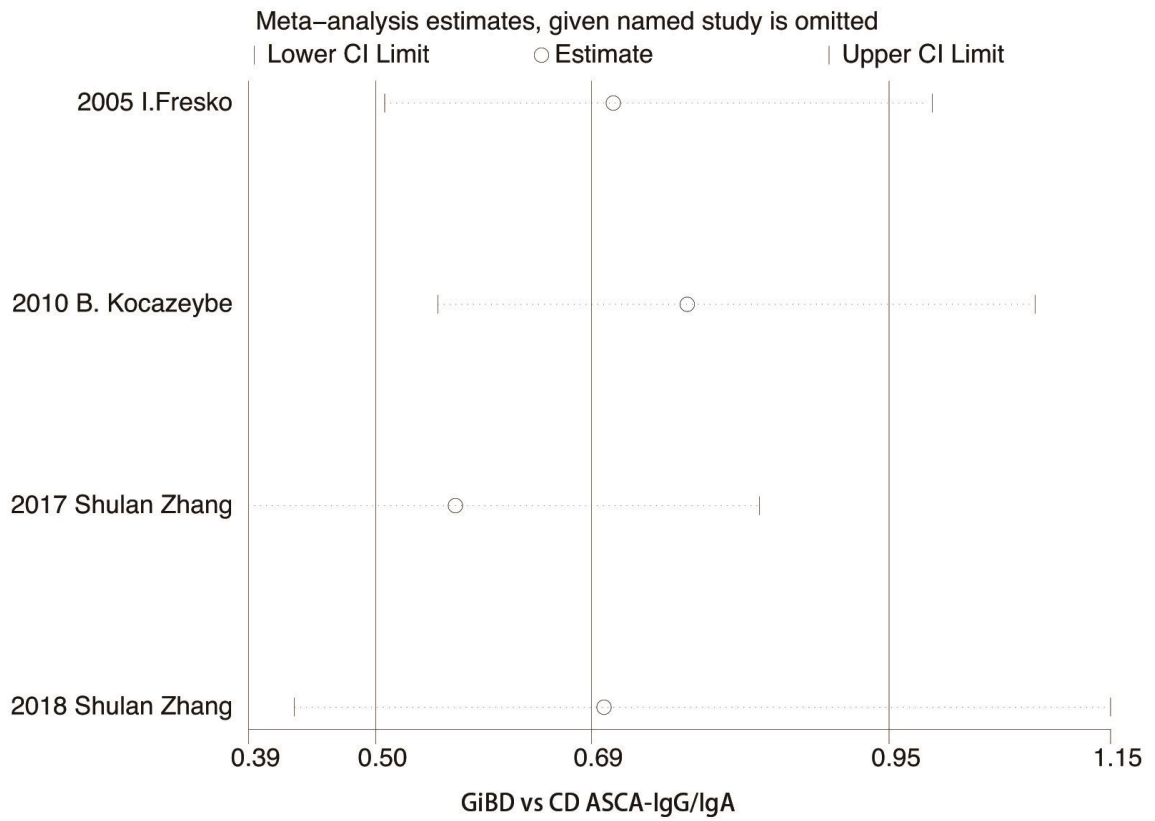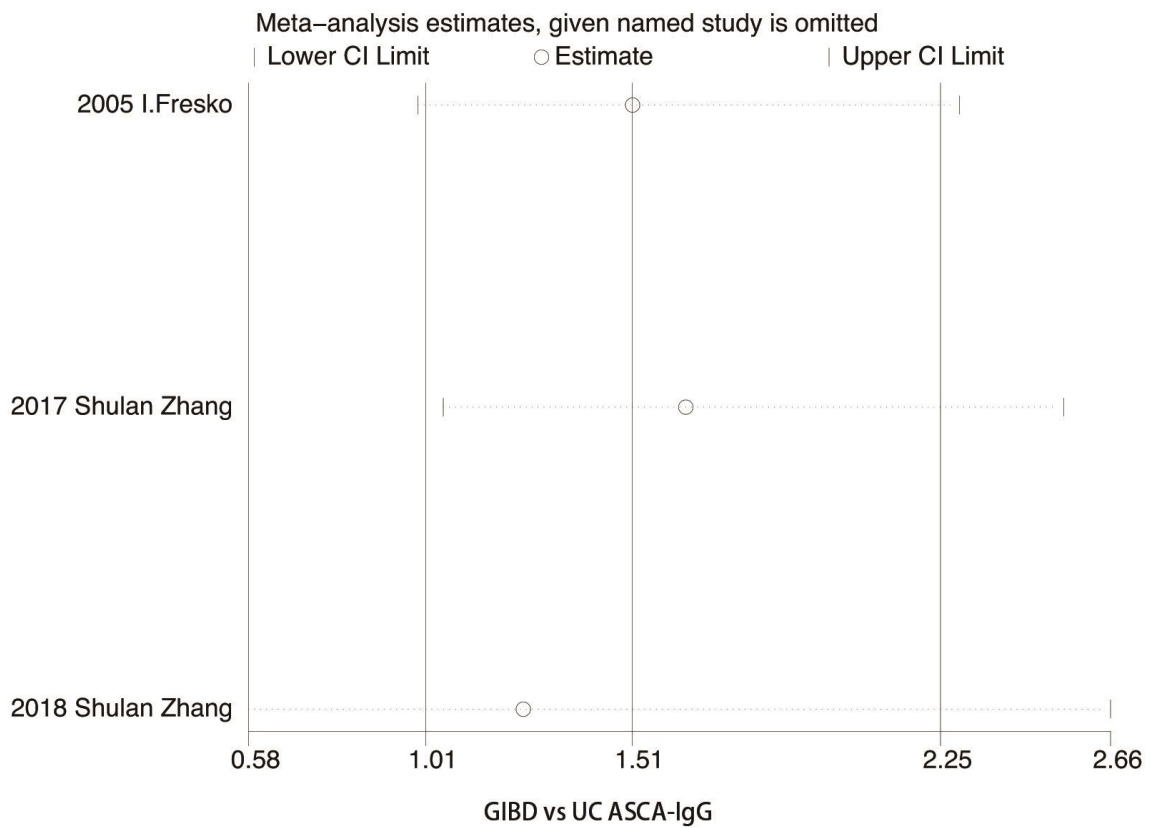

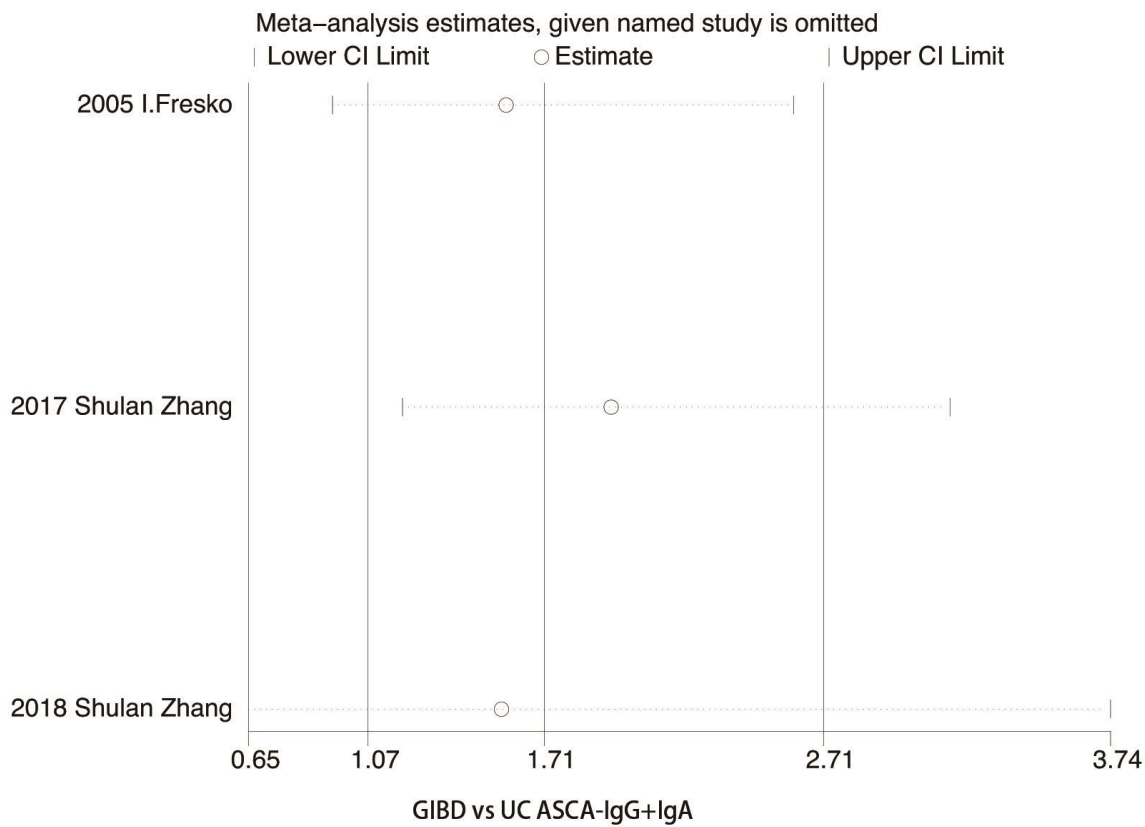

Supplement: bmjopen-2019-033880.draft_revisions.pdf [file bmjopen-2019-033880.draft_revisions.pdf]
