# Supplementary material for: Meta-analysis of anti-Saccharomyces cerevisiae antibodies as diagnostic markers of Behçet’s disease with gastrointestinal involvement
Source: PubMed Central journal article supplement — BMJ Open. 2020 Oct 6;10(10):e033880. doi: 10.1136/bmjopen-2019-033880 (PMC7539584; doi:10.1136/bmjopen-2019-033880), 2020-10-06
Supplement: bmjopen-2019-033880supp003.pdf [file bmjopen-2019-033880supp003.pdf]

**Supplementary file 3 The full search strategy for EMBASE**

#1 yeast?, AND baker? OR (baker? AND yeast?) OR (yeast?, AND brewer?) OR (brewer? AND yeast?) OR (s AND cerevisiae) OR (s. AND cerevisiae) OR (saccharomyces AND cerevisiae) OR (saccharomyces AND capensis) OR (saccharomyces AND cerevisia) OR (saccharomyces AND cerevisiae) OR (saccharomyces AND cerevisial) OR (saccharomyces AND cervisiae) OR (saccharomyces AND diastaticus) OR (saccharomyces AND italicus) OR (saccharomyces AND oviformis) OR (saccharomyces AND uvarum AND var. AND melibiosus) OR asca

#2 behcet? OR ('triple symptom' AND complex) OR (triple AND symptom AND complex) OR (complex, AND triple AND symptom) OR (complices, AND triple AND symptom) OR (symptom AND complex, AND triple) OR (symptom AND complices, AND triple) OR (triple AND symptom AND complices) OR 'adamantiades behcet' OR (old AND silk AND route AND disease) OR behçet

#3 #1 AND #2
