# Supplementary material for: Meta-analysis of anti-Saccharomyces cerevisiae antibodies as diagnostic markers of Behçet’s disease with gastrointestinal involvement
Source: PubMed Central journal article supplement — BMJ Open. 2020 Oct 6;10(10):e033880. doi: 10.1136/bmjopen-2019-033880 (PMC7539584; doi:10.1136/bmjopen-2019-033880), 2020-10-06
Supplement: bmjopen-2019-033880supp004.pdf [file bmjopen-2019-033880supp004.pdf]

Supplementary file 4 Demographic characteristics of patients and healthy controls included in the meta-analysis

BD: Behçet's disease; GIBD: gastrointestinal Behçet's disease; CD: Crohn's disease; UC: ulcerative colitis; iTB: intestinal tuberculosis; HC: healthy control; /: No such group included; Blank: no such information in the article

|                                       | BD                  | GIBD                | CD                     | UC                     | iTB                    | HC                     |
|---------------------------------------|---------------------|---------------------|------------------------|------------------------|------------------------|------------------------|
| <b>Female, n (%)</b>                  |                     |                     |                        |                        |                        |                        |
| 2018 Shulan Zhang                     | /                   |                     |                        |                        |                        | /                      |
| 2017 Shulan Zhang                     |                     |                     | 37 (28.9)              | 69 (49.3)              |                        |                        |
| 2011 George Vaiopoulos                | 28 (48.3)           | /                   | /                      | /                      | /                      |                        |
| 2010 B. Kocazeybek                    | /                   | 5 (38.5)            | 39 (61.9)              | 51 (50.0)              | <sup>3</sup><br>(30.0) | 99 (60.0)              |
| 2006 Chang Hwan Choi                  | 16 (86.6)           | 47 (44.3)           | /                      | /                      | /                      | 24 (53.3)              |
| 2005 I. Fresko                        | 20 (23.5)           | 2 (25.0)            | 10 (41.7)              | 10 (40.0)              | /                      | 9 (42.9)               |
| 2005 Seung-Ho Rhee                    | /                   | 28 (63.6)           | /                      | /                      | /                      |                        |
| 2002 I. Krause                        | 20 (74.1)           |                     |                        |                        |                        |                        |
| 2002 Byeong Gwan Kim                  | /                   | 20                  | 28                     | 36                     | 7                      |                        |
| <b>Median age at study (max, min)</b> |                     |                     |                        |                        |                        |                        |
| 2018 Shulan Zhang                     | /                   |                     |                        |                        |                        |                        |
| 2017 Shulan Zhang                     | /                   |                     | 33 (69,13)             | 42 (76,13)             |                        | /                      |
| 2011 George Vaiopoulos                | 38.5<br>(17,70)     | /                   | /                      | /                      | /                      |                        |
| 2010 B. Kocazeybek                    | /                   | 32.11<br>(23.22,41) | 37.56<br>(24.91,50.21) | 40.72<br>(27.28,54.16) | SD<br>9.96             | 35.07<br>(24.58,45.56) |
| 2006 Chang Hwan Choi                  | 38 (18,65)          | 37                  | /                      | /                      | /                      | 39 (16,69)             |
| 2005 I. Fresko                        | 34.3<br>(32.0,36.7) | 26.9<br>(24.1,29.6) | 38.9<br>(34.6,43.2)    | 35.6<br>(33.0,38.3)    | /                      | 33.7<br>(30.4,37.0)    |
| 2005 Seung-Ho Rhee                    | /                   | 37.6                | /                      | /                      | /                      |                        |
| 2002 I. Krause                        | 41.6<br>(36.9,46.2) |                     |                        |                        |                        |                        |
| 2002 Byeong Gwan Kim                  | /                   | 43.2                | 40.9                   | 30.6                   | 33.6                   |                        |
