# Supplementary material for: Meta-analysis of anti-Saccharomyces cerevisiae antibodies as diagnostic markers of Behçet’s disease with gastrointestinal involvement
Source: PubMed Central journal article supplement — BMJ Open. 2020 Oct 6;10(10):e033880. doi: 10.1136/bmjopen-2019-033880 (PMC7539584; doi:10.1136/bmjopen-2019-033880), 2020-10-06

Supplementary file 5 Results of quality assessment of the included studies based on the QUADAS-1 tool

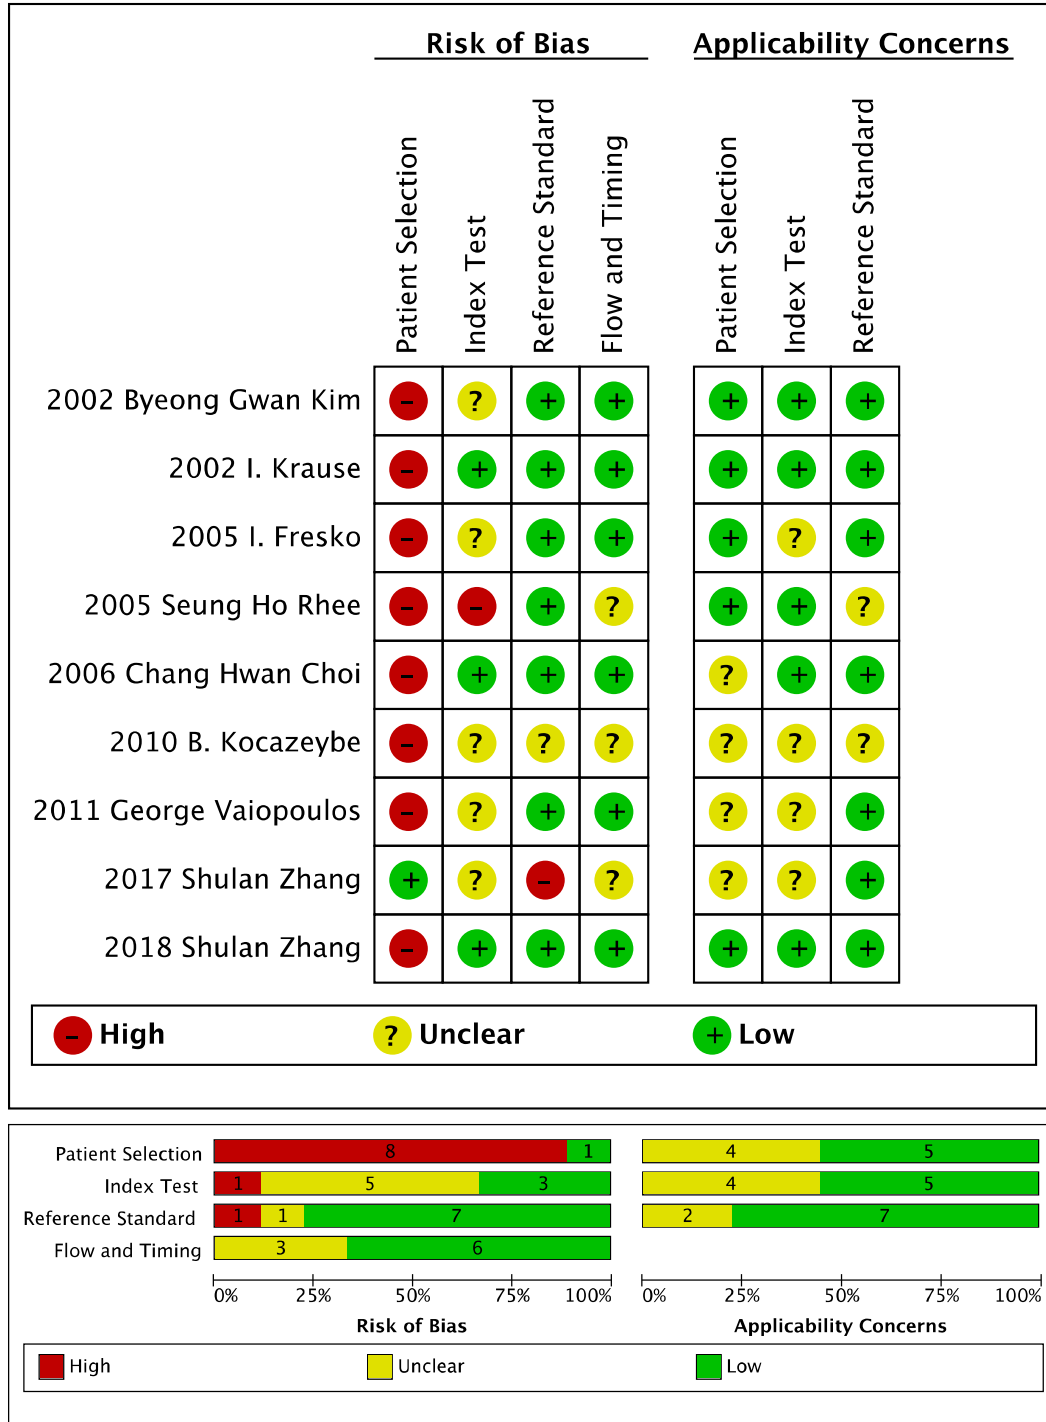

Supplement: bmjopen-2019-033880supp005.pdf [file bmjopen-2019-033880supp005.pdf]
